# Supplementary material
Source: publisher figshare collection journal article supplement (https://tandf.figshare.com/ndownloader/files/17256548)
Supplement: Supplementary file 1 [file 17256548]

## Sheet: Contents
	This workbook contains supplementary results for the paper
	The structure and drivers of the European carbon footprint, 1995-2016
	Wood et al, 2019, Climate Policy

## Sheet: ProdCons
Absolute quantities			1995	1996	1997	1998	1999	2000	2001	2002	2003	2004	2005	2006	2007	2008	2009	2010	2011	2012	2013	2014	2015	2016	Total change for 2015	Total change	Since 2007	ProdVsCons
Total	Production GHG (Gt CO2-eq)		5.12141	5.25497	5.17786	5.17611	5.13138	4.98669	5.02007	5.00253	5.09512	5.16506	5.15904	5.18712	5.15575	5.06866	4.74783	4.88073	4.71622	4.62754	4.53655	4.36013	4.43166	4.44506	0.134679	0.132062	0.862156	1.27045
Total	Consumption GHG (Gt CO2-eq)		6.10815	6.21932	6.0564	6.28959	6.3321	6.31846	6.38122	6.30262	6.57113	6.69591	6.78821	6.91237	6.93802	6.87319	6.17438	6.30812	6.14214	5.82643	5.66984	5.51029	5.59366	5.64721	0.0842308	0.0754626	0.813952
Total	Production CO2 (Gt)		4.05008	4.17224	4.09477	4.09851	4.05299	4.05404	4.10512	4.0891	4.18075	4.25508	4.26003	4.29002	4.25995	4.1787	3.8766	4.01033	3.86315	3.80641	3.7277	3.55376	3.61399	3.61776	0.107675	0.106743	0.849249	1.17796
Total	Consumption CO2 (Gt)		4.56027	4.66162	4.50498	4.66804	4.70013	4.78875	4.83404	4.76825	4.98154	5.08743	5.13797	5.2361	5.27142	5.21008	4.65152	4.79407	4.66286	4.43812	4.3474	4.19339	4.24449	4.26157	0.0692452	0.0654991	0.80843
Percap	Production GHG (Gt CO2-eq)		10.303	10.4489	10.2783	10.2408	10.1255	9.82193	9.86787	9.83192	10.0402	10.1034	10.0355	10.0865	10.0141	9.82177	9.16519	9.42086	9.1497	8.96463	8.77889	8.30676	8.26478	8.23679	0.19783	0.200546	0.82252	1.23017
Percap	Consumption GHG (Gt CO2-eq)		11.917	12.0227	11.6852	12.0648	12.0709	11.9295	12.0749	11.9319	12.4159	12.5852	12.7563	12.983	13.0172	12.9288	11.568	11.7498	11.5288	10.9634	10.6931	10.1955	10.1198	10.1326	0.150811	0.149734	0.778401
Percap	Production CO2 (Gt)		8.0581	8.1969	8.03733	8.02335	7.90906	7.89681	7.97648	7.94646	8.15346	8.23244	8.18403	8.23347	8.15507	7.97778	7.35744	7.61382	7.37342	7.25576	7.09765	6.67344	6.64449	6.61577	0.175428	0.178991	0.811246	1.153
Percap	Consumption CO2 (Gt)		8.87661	8.97975	8.6654	8.94125	8.94774	9.0301	9.11715	8.99891	9.39176	9.5387	9.62558	9.79049	9.83412	9.7348	8.65728	8.89517	8.71678	8.31419	8.15517	7.72853	7.6534	7.62795	0.137802	0.140668	0.775662
Rates of change			1995	1996	1997	1998	1999	2000	2001	2002	2003	2004	2005	2006	2007	2008	2009	2010	2011	2012	2013	2014	2015	2016
Total	Production - GHG (Gt CO2-eq)		1	1.02608	1.01102	1.01068	1.00195	0.973695	0.980214	0.976788	0.994868	1.00852	1.00735	1.01283	1.00671	0.989701	0.927056	0.953006	0.920883	0.903569	0.885802	0.851354	0.865321	0.867938	0.134679	0.132062	0.137844
Total	Consumption GHG (Gt CO2-eq)		1	1.0182	0.991528	1.0297	1.03666	1.03443	1.04471	1.03184	1.0758	1.09623	1.11134	1.13166	1.13586	1.12525	1.01084	1.03274	1.00556	0.953878	0.928242	0.902121	0.915769	0.924537	0.0842308	0.0754626	0.186048
Total	Production CO2 (Gt)		1	1.03016	1.01103	1.01196	1.00072	1.00098	1.01359	1.00963	1.03226	1.05062	1.05184	1.05924	1.05182	1.03176	0.957167	0.990187	0.953846	0.939836	0.920401	0.877454	0.892325	0.893257	0.107675	0.106743	0.150751
Total	Consumption CO2 (Gt)		1	1.02223	0.987876	1.02363	1.03067	1.0501	1.06003	1.04561	1.09238	1.1156	1.12668	1.1482	1.15594	1.1425	1.02001	1.05127	1.0225	0.973215	0.953321	0.919549	0.930755	0.934501	0.0692452	0.0654991	0.19157
Percap	Production - GHG (Gt CO2-eq)		1	1.01416	0.997602	0.993957	0.982769	0.953305	0.957764	0.954275	0.974492	0.980626	0.974033	0.97898	0.971956	0.95329	0.889563	0.914378	0.888059	0.870097	0.852069	0.806245	0.80217	0.799454	0.19783	0.200546	0.17748
Percap	Consumption GHG (Gt CO2-eq)		1	1.00887	0.980544	1.0124	1.01291	1.00105	1.01325	1.00125	1.04186	1.05607	1.07043	1.08945	1.09232	1.0849	0.970716	0.985966	0.967424	0.919978	0.897293	0.855539	0.849189	0.850266	0.150811	0.149734	0.221599
Percap	Production CO2 (Gt)		1	1.01722	0.997422	0.995688	0.981504	0.979985	0.989871	0.986145	1.01183	1.02164	1.01563	1.02176	1.01203	0.990032	0.913049	0.944866	0.915032	0.900431	0.88081	0.828165	0.824572	0.821009	0.175428	0.178991	0.188754
Percap	Consumption CO2 (Gt)		1	1.01162	0.976206	1.00728	1.00801	1.01729	1.0271	1.01378	1.05803	1.07459	1.08438	1.10295	1.10787	1.09668	0.975291	1.00209	0.981994	0.93664	0.918725	0.870662	0.862198	0.859332	0.137802	0.140668	0.224338
																		1.29245
	GHG
	GHG
	CO2

## Sheet: Table1
	Table 1 of the paper: This data is an extract from the ProdCons sheet
		1995	2000	2005	2010	2015	2016
	CO2 only:
	Production CO2 (Gt)	4.05008	4.05404	4.26003	4.01033	3.61399	3.61776
	Consumption CO2 (Gt)	4.56027	4.78875	5.13797	4.79407	4.24449	4.26157
	Net CO2 imports relative to consumption	0.111877	0.153425	0.170872	0.163481	0.148546	0.151074
	Non-CO2 GHGs
	Production non-CO2 (Gt)	1.07133	0.932649	0.899006	0.870398	0.817675	0.827306
	Consumption non-CO2 (Gt)	1.54789	1.52971	1.65024	1.51404	1.34917	1.38564
	Net non-CO2 imports relative to consumption	0.307876	0.390309	0.455227	0.425116	0.393941	0.402944
	All Greenhouse gases:
	Production GHG (Gt CO2-eq)	5.12141	4.98669	5.15904	4.88073	4.43166	4.44506
	Consumption GHG (Gt CO2-eq)	6.10815	6.31846	6.78821	6.30812	5.59366	5.64721
	Net GHG imports relative to consumption	0.161546	0.210775	0.24	0.226278	0.207735	0.212875

## Sheet: Decoupling
Full column descriptors: EU28 production account; consumption account; % net transfer (difference between consumption and production account, relative to production account); Emissions intensity of production account Gg CO2-eq per Million GDP (PPP 2011 international dollars); Emissions intensity of consumption account Mt CO2 per Million GDP (PPP 2011 international dollars); Rate of decoupling, pr…
	Prod Account (Gt CO2-eq)	Cons Account (Gt CO2-eq)	Prod-per unit GDP (Gt/MUSD)	Cons-per unit GDP (Gt/MUSD)	Prod decoupling	Cons decoupling
1995	5.12141	6.10815	0.434964	0.503102
1996	5.25497	6.21932	0.432841	0.498036	0.00488003	0.0100699
1997	5.17786	6.0564	0.414557	0.471299	0.0422425	0.0536838
1998	5.17611	6.28959	0.401287	0.472762	0.0320089	-0.00310325
1999	5.13138	6.3321	0.386301	0.460521	0.0373458	0.0258921
2000	4.98669	6.31846	0.360754	0.438163	0.0661317	0.0485486
2001	5.02007	6.38122	0.3543	0.433542	0.0178907	0.0105467
2002	5.00253	6.30262	0.34825	0.422633	0.0170772	0.025162
2003	5.09512	6.57113	0.350824	0.433834	-0.00739202	-0.0265021
2004	5.16506	6.69591	0.343739	0.428174	0.0201958	0.0130471
2005	5.15904	6.78821	0.33455	0.425254	0.0267306	0.00681814
2006	5.18712	6.91237	0.325201	0.41859	0.0279477	0.0156711
2007	5.15575	6.93802	0.312896	0.406731	0.0378374	0.0283318
2008	5.06866	6.87319	0.305074	0.401581	0.0249971	0.0126608
2009	4.74783	6.17438	0.298527	0.376792	0.0214614	0.0617288
2010	4.88073	6.30812	0.30113	0.375572	-0.00872063	0.00323682
2011	4.71622	6.14214	0.287766	0.362592	0.044379	0.0345627
2012	4.62754	5.82643	0.282752	0.345794	0.0174271	0.0463269
2013	4.53655	5.66984	0.276554	0.336854	0.0219204	0.0258539
2014	4.36013	5.51029	0.260931	0.32026	0.0564884	0.0492621
2015	4.43166	5.59366	0.257762	0.315617	0.0121449	0.0144968
2016	4.44506	5.64721	0.255041	0.313743	0.0105583	0.00593723

## Sheet: Trade
Gt CO2-eq
Row	Import1995	Import1996	Import1997	Import1998	Import1999	Import2000	Import2001	Import2002	Import2003	Import2004	Import2005	Import2006	Import2007	Import2008	Import2009	Import2010	Import2011	Import2012	Import2013	Import2014	Import2015
North America	0.196856	0.193283	0.159254	0.194811	0.204992	0.220664	0.221964	0.200423	0.19023	0.20068	0.20279	0.218658	0.243134	0.257904	0.215022	0.196721	0.209845	0.17885	0.181106	0.206936	0.21537
South America	0.0668416	0.067764	0.066361	0.069384	0.0771714	0.0805716	0.0816527	0.111573	0.114807	0.119794	0.119424	0.125029	0.121062	0.122612	0.103881	0.0953665	0.0917692	0.0853424	0.0781824	0.0823389	0.0862263
Australia	0.0228899	0.0235479	0.0243301	0.0267718	0.02755	0.0307737	0.0324939	0.0276367	0.0285198	0.0281181	0.0304275	0.0292523	0.0311933	0.0370346	0.0261313	0.0273236	0.0213085	0.0180701	0.0181892	0.0177328	0.0191146
Asia	0.38946	0.402651	0.438585	0.507812	0.495303	0.545933	0.577095	0.599595	0.699691	0.83677	0.933727	1.01292	1.05703	1.10923	0.90411	0.926126	0.952502	0.859052	0.834844	0.819854	0.783437
Africa	0.118909	0.123287	0.128279	0.131698	0.140703	0.155798	0.161533	0.159897	0.165272	0.16646	0.172221	0.189711	0.179745	0.197321	0.1615	0.171847	0.169373	0.190375	0.156789	0.152109	0.164273
Middle east	0.176415	0.192409	0.198152	0.189847	0.19754	0.212198	0.209159	0.216224	0.228056	0.250105	0.264945	0.270051	0.262299	0.270682	0.259866	0.261804	0.28985	0.279797	0.281513	0.2685	0.293063
Russia	0.496908	0.458053	0.381526	0.474733	0.521326	0.567534	0.560659	0.495069	0.528974	0.46127	0.478331	0.457158	0.450248	0.44692	0.347833	0.395261	0.402121	0.354508	0.332455	0.323486	0.310275
Row	Export1995	Export1996	Export1997	Export1998	Export1999	Export2000	Export2001	Export2002	Export2003	Export2004	Export2005	Export2006	Export2007	Export2008	Export2009	Export2010	Export2011	Export2012	Export2013	Export2014	Export2015
North America	0.152616	0.160428	0.180833	0.197748	0.216984	0.241551	0.237905	0.231816	0.212766	0.224204	0.23138	0.233549	0.209245	0.211216	0.171677	0.186858	0.189943	0.200142	0.189549	0.182974	0.193436
South America	0.0339242	0.0347978	0.0425766	0.0425291	0.0380709	0.0395557	0.0404278	0.0353478	0.0306736	0.0316898	0.0351328	0.037373	0.0414222	0.0443758	0.039864	0.0483953	0.0481566	0.0563279	0.0577208	0.0574318	0.0534962
Australia	0.0109268	0.0117375	0.0134968	0.0124394	0.0137161	0.0125461	0.0114604	0.0126591	0.013748	0.0151212	0.0156589	0.0152087	0.0175753	0.0160469	0.013351	0.0161829	0.0181394	0.0184372	0.0169675	0.0152039	0.0155925
Asia	0.153856	0.161692	0.166126	0.134864	0.147804	0.160073	0.157049	0.167302	0.165959	0.181647	0.185616	0.188139	0.189312	0.205781	0.207813	0.250824	0.277685	0.306435	0.302215	0.284267	0.295025
Africa	0.0278145	0.0274811	0.0298928	0.0312625	0.0284286	0.0262538	0.0315127	0.0340135	0.0314208	0.0338706	0.0366236	0.0366608	0.0396763	0.0459578	0.0524672	0.0539748	0.0533522	0.0597862	0.0604594	0.0569178	0.0560462
Middle east	0.0595687	0.0684203	0.0745701	0.072876	0.0699292	0.0732951	0.0663142	0.0760002	0.0685107	0.081688	0.0873533	0.0887414	0.0922888	0.0955322	0.0942199	0.106569	0.107001	0.121089	0.112491	0.108961	0.111654
Russia	0.0971391	0.081041	0.0874275	0.0707608	0.0544837	0.0684649	0.063358	0.0547117	0.062361	0.0628838	0.0562463	0.0565521	0.061163	0.0656319	0.0529981	0.0711376	0.0803782	0.0839546	0.0821786	0.0685433	0.0468055
Total Imports	1.46828	1.461	1.39649	1.59506	1.66459	1.81347	1.84456	1.81042	1.95555	2.0632	2.20187	2.30278	2.34471	2.4417	2.01834	2.07445	2.13677	1.96599	1.88308	1.87096	1.87176
Total Exports	0.535845	0.545599	0.594922	0.56248	0.569417	0.62174	0.608027	0.611851	0.585439	0.631104	0.648011	0.656224	0.650682	0.684541	0.632391	0.733941	0.774656	0.846172	0.821581	0.774298	0.772055
Imports as % of CBA	0.24038	0.234913	0.23058	0.253603	0.262881	0.287012	0.28906	0.287248	0.297597	0.308128	0.324366	0.333139	0.337951	0.35525	0.32689	0.328854	0.347887	0.337427	0.332122	0.339539	0.334622
Exports as % of PBA	0.104629	0.103825	0.114897	0.108668	0.110968	0.12468	0.121119	0.122308	0.114902	0.122187	0.125607	0.12651	0.126205	0.135054	0.133196	0.150375	0.164254	0.182856	0.181102	0.177586	0.174214

## Sheet: SDA
Table 2 Drivers of annual changes in GHG footprints in the European Union. Full column descriptors: GHG intensity of production; Intermediate inputs to production; Trade in intermediate products; Consumption structure of final products; Trade in final products; Consumption per capita; Population; Direct emissions by final consumers; and Total annual changes in GHG emissions.
	Annual changes (Gt CO2eq)								Total annual changes
	GHG intensity	Int. inputs	Trade in int.	Final prod.	Trade in final prod.	Cons. per cap	Pop.	Direct emis.
1995-96	-0.09	0.04	0	-0.07	0.03	0.13	0.01	0.05	0.11
1996-97	-0.33	-0.03	0.01	0.07	-0.01	0.14	0.01	-0.02	-0.16
1997-98	0.09	0.03	-0.09	-0.05	0.03	0.21	0.01	0	0.23
1998-99	-0.12	-0.1	0.09	-0.01	0.01	0.17	0.01	0	0.04
1999-00	-0.92	0.08	0.37	0.17	0.04	0.23	0.01	0.01	-0.01
2000-01	-0.18	0.03	0.11	0.01	-0.01	0.07	0.02	0.02	0.06
2001-02	-0.03	0.02	-0.09	-0.05	0.04	0.03	0.02	-0.02	-0.08
2002-03	0.45	0.12	-0.5	-0.03	0.06	0.14	0.02	0	0.27
2003-04	-0.31	0.04	0.08	0.07	0.05	0.15	0.02	0.02	0.12
2004-05	-0.39	0.07	0.2	0.02	0.03	0.13	0.03	0.01	0.09
2005-06	-0.38	0.08	0.12	0.05	0.02	0.21	0.02	0	0.12
2006-07	-0.18	0.03	-0.02	0.01	0.03	0.19	0.03	-0.06	0.03
2007-08	-0.56	0.05	0.28	0.04	0.03	0.04	0.03	0.03	-0.06
2008-09	0.61	-0.07	-0.56	-0.27	-0.02	-0.36	0.02	-0.05	-0.7
2009-10	-0.43	0.04	0.21	0.15	0	0.14	0.01	0.01	0.13
2010-11	-0.25	0	0.11	0.01	0.01	0.06	0.02	-0.12	-0.17
2011-12	-0.17	0.04	-0.07	-0.02	0	-0.09	-0.01	0.01	-0.32
2012-13	-0.07	0.05	-0.11	-0.02	0.01	-0.03	0.01	0.02	-0.16
2013-14	-0.15	0.02	-0.05	0	0	0.06	0	-0.05	-0.16
2014-15	-0.06	0.01	0.02	0	0	0.09	0	0.02	0.08
Figure. Drivers for cumulative changes in CO2 footprints between 1995 and 2015. Solid line represents total cumulative CO2 emissions change in each year referent to 1995.

## Sheet: BySource
2015
			final good
			THIS IS THE PRODUCT IN WHICH THE EMISSIONS ARE EMBODED IN
		Region of Consumption	EU	EU	EU	EU	EU	EU	EU	NonEU	NonEU	NonEU	NonEU	NonEU	NonEU	NonEU
Source	Region of emission		Agric	Mining	Manufacturing	Electricity and utilities	Construction	Transport	Services	Agric	Mining	Manufacturing	Electricity and utilities	Construction	Transport	Services
THIS IS THE INDUSTRY IN WHICH THE EMISSIONS OCCURS IN	EU	Agric	0.101957	9.49323e-05	0.205007	0.000735787	0.00323624	0.000312566	0.0459509	0.00336093	0.000302845	0.0342699	0.000280244	0.00319507	0.00039543	0.0178972
	EU	Mining	0.000969837	0.0354911	0.0405455	0.0175695	0.0182031	0.000737796	0.0201479	0.000336176	0.00137826	0.0172832	0.000193785	0.00474821	0.000738405	0.00763326
	EU	Manufacturing	0.00499498	0.000391382	0.338379	0.00644659	0.158223	0.0039642	0.0930875	0.00186927	0.000756259	0.129936	0.00101039	0.0361722	0.00353914	0.0453315
	EU	Electricity and utilities	0.00745483	0.00143951	0.138307	0.564406	0.0326622	0.00204538	0.177225	0.000894923	0.000296141	0.0613979	0.000375016	0.0103084	0.00131907	0.0240265
	EU	Construction	0.000203683	1.14103e-05	0.00237116	0.000405809	0.0813442	5.49567e-05	0.0142462	2.66382e-05	1.34238e-05	0.00121299	2.33339e-05	0.00155581	3.48157e-05	0.00116648
	EU	Transport	0.00221499	0.000607224	0.0522866	0.00474862	0.0148228	0.130467	0.0809179	0.00184562	0.00062267	0.0610525	0.00109618	0.0312864	0.0380173	0.059916
	EU	Services	0.00306649	0.000336395	0.0573006	0.00472292	0.0270112	0.00975069	0.374185	0.00083879	0.000234621	0.0320527	0.000383878	0.00741282	0.00226862	0.0380883
	NonEU	Agric	0.0326094	0.000291375	0.136989	0.00118382	0.00733753	0.00251983	0.0534683	1.4498	0.00629314	2.27704	0.0269074	0.1721	0.021141	0.813762
	NonEU	Mining	0.00626129	0.0214974	0.259929	0.0635718	0.0343768	0.00898412	0.0966753	0.0329289	0.560362	1.76666	0.140201	0.989572	0.0554604	0.834359
	NonEU	Manufacturing	0.00644988	0.000599989	0.34428	0.00537411	0.0506598	0.00736004	0.0963316	0.0462532	0.0133298	4.2608	0.0298141	3.80548	0.050105	1.32749
	NonEU	Electricity and utilities	0.00663797	0.000401192	0.223885	0.00296166	0.0244038	0.00505334	0.0789053	0.232637	0.0224437	3.05234	4.08075	1.26441	0.0498287	2.53412
	NonEU	Construction	1.85929e-05	2.94731e-06	0.000372447	2.59244e-05	0.000985813	3.17438e-05	0.000747879	0.000234542	7.64081e-05	0.00301196	0.000296507	0.268341	0.000246088	0.0198148
	NonEU	Transport	0.00192097	0.0015401	0.0582239	0.00423333	0.0125978	0.0535886	0.0586222	0.0127124	0.00484546	0.322463	0.00892858	0.204546	0.425629	0.474343
	NonEU	Services	0.00107282	0.000276345	0.0250411	0.00110883	0.00578478	0.00355897	0.041638	0.0105057	0.00200919	0.207529	0.00676153	0.0991555	0.0228617	2.10511
			0.0127445	0.0437566	0.529068	0.129396	0.0699718	0.0182866	0.196776
		EU footprint by source sector								EU footprint by final good
			EU Production	EU emissions in exports	Emissions in EU Imports	EU Consumption					EU Production	EU emissions in exports	Emissions in EU Imports	EU Consumption
			0	3.74326	3.74326	0			THIS IS THE PRODUCT IN WHICH THE EMISSIONS ARE EMBODED IN		0	3.74326	3.74326	0
	THIS IS THE INDUSTRY IN WHICH THE EMISSIONS OCCURS IN	Agric	0.416996	0.0597016	0.234399	0.591694	0.396149	0.1009		Agric	0.130035	0.00917236	0.0549709	0.175833
		Mining	0.165976	0.0323113	0.491295	0.62496	0.786123	0.0517015		Mining	0.0419761	0.00360422	0.0246094	0.0629813
		Manufacturing	0.824101	0.218615	0.511056	1.11654	0.457713	0.195796		Manufacturing	1.1714	0.337205	1.04872	1.88292	0.199609	0.336616
		Electricity and utilities	1.02216	0.098618	0.342249	1.26579	0.270384	0.0779103		Electricity and utilities	0.602398	0.00336283	0.0784595	0.677495
		Construction	0.102671	0.00403349	0.00218535	0.100823	0.0216751	0.0400058		Construction	0.430182	0.094679	0.136146	0.471649
		Transport	0.479902	0.193837	0.190727	0.476792	0.400021	0.406543		Transport	0.193646	0.0463128	0.0810966	0.228429
		Services	0.557653	0.0812798	0.0784809	0.554854				Services	0.99982	0.194059	0.426389	1.23215
		Household	0.862202	0	0	0.862202	0	0	2.59033e-05	Household	0.862202			0.862202
		Total	4.43166	0.688396	1.85039	5.59366				Total	4.43166	0.688396	1.85039	5.59366
							0.111727
			Agric	Mining	Manufacturing	Electricity and utilities	Construction	Transport	Services
		Production	0.130035	0.0419761	1.1714	0.602398	0.430182	0.193646	0.99982
		NonEU consumption	0.00917236	0.00360422	0.337205	0.00336283	0.094679	0.0463128	0.194059
		NonEU production	0.0549709	0.0246094	1.04872	0.0784595	0.136146	0.0810966	0.426389

## Sheet: Product
Product level results (GHG)
Product #	Product group name	Code	Consumption account	GHG Intensity (products to final demand)	Import account	GHG Intensity (imported products)	Export account	GHG Intensity (exported products)
			Kt CO2-eq	Kt CO2-eq/M.Euro	Kt CO2-eq	Kt CO2-eq/M.Euro	Kt CO2-eq	Kt CO2-eq/M.Euro
1	Paddy rice	p01.a	3540	3.42	410	6.91	264	3.5
2	Wheat	p01.b	11900	1.19	9290	1.49	14800	1.1
3	Cereal grains nec	p01.c	5110	1.04	9590	1.13	7810	0.922
4	Vegetables, fruit, nuts	p01.d	40000	0.388	30300	0.434	13100	0.396
5	Oil seeds	p01.e	5800	1.01	11600	0.914	5700	1.16
6	Sugar cane, sugar beet	p01.f	372	0.64	143	2.98	144	2.93
7	Plant-based fibers	p01.g	718	1.28	578	1.21	316	0.685
8	Crops nec	p01.h	25300	1.69	37900	1.84	2150	1.04
9	Cattle	p01.i	13100	4.17	10900	5	14200	4.92
10	Pigs	p01.j	3170	0.951	1820	0.931	1880	0.934
11	Poultry	p01.k	14500	0.729	1230	0.805	1550	0.806
12	Meat animals nec	p01.l	19700	2.52	5500	3.42	6560	2.78
13	Animal products nec	p01.m	5650	2.52	3210	2.71	2200	2.27
14	Raw milk	p01.n	13300	2.53	0	0	0	0
15	Wool, silk-worm cocoons	p01.o	1170	10.8	4040	7.41	3930	45.8
16	Manure (conventional treatment)	p01.w.1	0	0	0	0	0	0
17	Manure (biogas treatment)	p01.w.2	0	0	0	0	0	0
18	Products of forestry, logging and related services (02)	p02	5020	0.469	2950	0.538	2870	0.593
19	Fish and other fishing products; services incidental of fishing (05)	p05	7590	0.582	5510	0.536	3790	0.716
20	Anthracite	p10.a	590	10.2	3280	10.8	248	2.63
21	Coking Coal	p10.b	50.3	5.72	4910	14.6	432	5.41
22	Other Bituminous Coal	p10.c	20000	7.59	68000	22.5	6260	4.7
23	Sub-Bituminous Coal	p10.d	288	10.8	6460	82.6	2.82	1.5
24	Patent Fuel	p10.e	468	8.86	26.7	1.84	28	1.82
25	Lignite/Brown Coal	p10.f	1730	2.23	937	3.49	723	3.07
26	BKB/Peat Briquettes	p10.g	985	2.23	448	1.87	481	1.71
27	Peat	p10.h	291	1.57	29.6	1.27	73.3	1.47
28	Crude petroleum and services related to crude oil extraction, excluding surveying	p11.a	5000	1.52	185000	1.89	16700	0.778
29	Natural gas and services related to natural gas extraction, excluding surveying	p11.b	38800	1.78	168000	2.35	39600	1.64
30	Natural Gas Liquids	p11.b.1	481	1.91	2520	1.01	299	1.31
31	Other Hydrocarbons	p11.c	348	4	1.73	2.25	0.271	1.3
32	Uranium and thorium ores (12)	p12	479	9.1	0.404	0.865	0.119	0.553
33	Iron ores	p13.1	769	12.9	2720	0.662	618	2.53
34	Copper ores and concentrates	p13.20.11	346	0.251	2660	0.301	496	0.289
35	Nickel ores and concentrates	p13.20.12	13	0.178	59.8	0.229	32.6	0.131
36	Aluminium ores and concentrates	p13.20.13	250	1.05	1970	1.27	44.1	1
37	Precious metal ores and concentrates	p13.20.14	73.8	0.108	42	0.0571	77.5	0.129
38	Lead, zinc and tin ores and concentrates	p13.20.15	116	0.176	1390	0.647	449	0.832
39	Other non-ferrous metal ores and concentrates	p13.20.16	43.6	0.305	1280	0.655	80.2	1.06
40	Stone	p14.1	1090	0.687	1490	1.01	832	0.432
41	Sand and clay	p14.2	1000	0.541	3810	1.18	2060	0.83
42	Chemical and fertilizer minerals, salt and other mining and quarrying products n.e.c.	p14.3	1210	0.667	2580	0.567	2250	0.624
43	Products of meat cattle	p15.a	52400	1.77	35400	2.63	18600	1.67
44	Products of meat pigs	p15.b	18400	0.559	6820	0.578	9110	0.567
45	Products of meat poultry	p15.c	23100	0.405	3670	0.452	3780	0.432
46	Meat products nec	p15.d	32400	0.451	4530	0.465	3300	0.425
47	products of Vegetable oils and fats	p15.e	3620	0.587	7410	0.59	6310	0.526
48	Dairy products	p15.f	76300	0.85	36500	0.931	50200	0.912
49	Processed rice	p15.g	2650	1.4	4820	2.44	556	0.534
50	Sugar	p15.h	5690	0.614	3810	0.788	2150	0.478
51	Food products nec	p15.i	182000	0.556	87400	0.631	90200	0.569
52	Beverages	p15.j	20100	0.415	15000	0.443	22000	0.389
53	Fish products	p15.k	34500	0.79	25000	0.992	11300	0.696
54	Tobacco products (16)	p16	12200	0.485	4800	0.511	5500	0.431
55	Textiles (17)	p17	52100	0.739	74700	0.957	27300	0.444
56	Wearing apparel; furs (18)	p18	81200	0.635	65600	0.82	22000	0.4
57	Leather and leather products (19)	p19	54300	1.01	56200	1.32	12500	0.337
58	Wood and products of wood and cork (except furniture); articles of straw and plaiting materials (20)	p20	12000	0.464	25400	0.668	19800	0.476
59	Wood waste to recycling	p20.w	0	0	0	0	0	0
60	Pulp	p21.1	491	0.463	5860	0.874	4400	0.494
61	Paper waste to recycling	p21.w.1	0	0	0	0	0	0
62	Paper and paper products	p21.2	15600	0.456	29000	0.507	29400	0.413
63	Printed matter and recorded media (22)	p22	26700	0.214	8620	0.334	6360	0.205
64	Coke Oven Coke	p23.1.a	2790	4.91	7080	4.05	6290	3.89
65	Gas Coke	p23.1.b	0	0	0	0	0	0
66	Coal Tar	p23.1.c	13.7	3.09	704	4.82	644	5.51
67	Motor Gasoline	p23.20.a	175000	1.53	72600	1.34	102000	1.42
68	Aviation Gasoline	p23.20.b	7.43	0.988	38.6	1.25	46.7	1.13
69	Gasoline Type Jet Fuel	p23.20.c	1.8	1.78	0	0	0	0
70	Kerosene Type Jet Fuel	p23.20.d	2330	1.39	7690	1.22	8340	1.19
71	Kerosene	p23.20.e	6660	1.11	1490	1.36	867	1.54
72	Gas/Diesel Oil	p23.20.f	97400	2.05	84200	1.44	74500	1.36
73	Heavy Fuel Oil	p23.20.g	3070	1.62	59400	1.67	28000	1.31
74	Refinery Gas	p23.20.h	7.38	0.946	4.83	0.678	4.88	0.675
75	Liquefied Petroleum Gases (LPG)	p23.20.i	7340	1.59	17400	1.32	7950	1.33
76	Refinery Feedstocks	p23.20.j	90.9	0.636	507	1.16	1200	1.36
77	Ethane	p23.20.k	0.61	0.47	194	1.49	13.5	0.954
78	Naphtha	p23.20.l	634	1.31	8970	1.29	8130	1.18
79	White Spirit & SBP	p23.20.m	127	1.42	2130	1.39	3320	1.49
80	Lubricants	p23.20.n	209	1.32	138	1.36	199	1.26
81	Bitumen	p23.20.o	252	1.25	2540	1.57	3910	1.67
82	Paraffin Waxes	p23.20.p	27.1	1.47	512	1.64	310	1.5
83	Petroleum Coke	p23.20.q	44.1	1.44	992	1.44	523	1.57
84	Non-specified Petroleum Products	p23.20.r	111	1.49	1780	1.63	1070	1.37
85	Nuclear fuel	p23.3	1330	0.427	2590	0.425	1900	0.358
86	Plastics, basic	p24.1	39000	0.36	20100	0.589	16200	0.4
87	Recycled waste plastic	p24.1.w	0	0	0	0	0	0
88	N-fertiliser	p24.2	533	1.18	922	1.37	589	1.09
89	P- and other fertiliser	p24.3	1940	1.07	5610	1.13	4390	0.987
90	Chemicals nec	p24.4	170000	0.944	267000	1.04	90000	0.585
91	Charcoal	p24.5	420	2.21	908	2.04	24.6	0.72
92	Additives/Blending Components	p24.6	402	2.59	1130	1.67	576	0.835
93	Biogasoline	p24.7	398	0.682	184	0.772	122	0.698
94	Biodiesels	p24.8	390	0.772	920	1.43	460	0.967
95	Other Liquid Biofuels	p24.9	169	0.786	23.2	0.876	17.8	0.767
96	Rubber and plastic products (25)	p25	20200	0.435	84900	0.582	49200	0.339
97	Glass and glass products	p26.a	674	0.772	18600	1	15600	0.785
98	Recycled glass waste	p26.w.1	0	0	0	0	0	0
99	Ceramic goods	p26.b	9840	0.967	12500	1.2	9850	0.856
100	Bricks, tiles and construction products, in baked clay	p26.c	370	0.721	845	1	1050	0.952
101	Cement, lime and plaster	p26.d	3780	1.77	24300	3.31	23100	2.32
102	Recycled ash	p26.d.w	0	0	0	0	0	0
103	Other non-metallic mineral products	p26.e	19700	1.25	21600	1.73	13600	0.94
104	Basic iron and steel and of ferro-alloys and first products thereof	p27.a	3880	1.31	131000	1.38	114000	1.05
105	Recycled steel scrap	p27.a.w	0	0	0	0	0	0
106	Precious metals	p27.41	480	0.413	3850	0.392	5380	0.467
107	Recycled pecious metals waste	p27.41.w	0	0	0	0	0	0
108	Aluminium and aluminium products	p27.42	1660	1	46600	1.19	28200	0.825
109	Recycled aluminium waste	p27.42.w	0	0	0	0	0	0
110	Lead, zinc and tin and products thereof	p27.43	485	0.504	3210	0.584	2370	0.497
111	Recycled lead, zinc and tin waste	p27.43.w	0	0	0	0	0	0
112	Copper products	p27.44	630	0.442	14500	0.477	16900	0.502
113	Recycled copper waste	p27.44.w	0	0	0	0	0	0
114	Other non-ferrous metal products	p27.45	444	0.67	8980	0.728	4440	0.606
115	Recycled other non-ferrous metals waste	p27.45.w	0	0	0	0	0	0
116	Foundry work services	p27.5	730	0.828	0	0	0	0
117	Fabricated metal products, except machinery and equipment (28)	p28	43100	0.467	91400	0.727	56600	0.391
118	Machinery and equipment n.e.c. (29)	p29	102000	0.424	159000	0.534	146000	0.32
119	Office machinery and computers (30)	p30	39200	0.508	44400	0.58	14600	0.295
120	Electrical machinery and apparatus n.e.c. (31)	p31	47300	0.51	106000	0.628	74700	0.376
121	Radio, television and communication equipment and apparatus (32)	p32	68000	0.489	86400	0.61	38700	0.341
122	Medical, precision and optical instruments, watches and clocks (33)	p33	33300	0.283	36900	0.346	33700	0.239
123	Motor vehicles, trailers and semi-trailers (34)	p34	146000	0.37	147000	0.405	185000	0.339
124	Other transport equipment (35)	p35	47200	0.454	54700	0.448	57800	0.326
125	Furniture; other manufactured goods n.e.c. (36)	p36	112000	0.467	66800	0.691	38800	0.369
126	Secondary raw materials	p37	528	0.522	0	0	0	0
127	Glass bottles directly reused	p37.w.1	0	0	0	0	0	0
128-148	Electricity and heat	p40	662000	3.03	15.3	1.32	20.9	1.36
149	Collected and purified water, distribution services of water (41)	p41	15800	0.521	0	0	0	0
150	Construction work (45)	p45	472000	0.339	24700	0.758	15500	0.361
151	Construction waste to recycling	p45.w	0	0	0	0	0	0
152	Sale, maintenance, repair of motor vehicles, motor vehicles parts, motorcycles, motor cycles parts and accessoiries	p50.a	13200	0.0936	1200	0.141	1350	0.0919
153	Retail trade services of motor fuel	p50.b	2130	0.265	757	0.678	893	0.504
154	Wholesale trade and commission trade services, except of motor vehicles and motorcycles (51)	p51	1600	0.0771	4560	0.135	4930	0.0878
155	Retail trade services, except of motor vehicles and motorcycles; repair services of personal and household goods (52)	p52	691	0.0597	3080	0.154	2700	0.0764
156	Hotel and restaurant services (55)	p55	106000	0.162	70300	0.276	49400	0.177
157	Railway transportation services	p60.1	25600	0.409	14500	0.632	6690	0.394
158	Other land transportation services	p60.2	24200	0.194	35000	0.306	19900	0.243
159	Transportation services via pipelines	p60.3	814	3.81	38500	7.17	9520	3.2
160	Sea and coastal water transportation services	p61.1	35900	2.36	122000	2.24	155000	2.82
161	Inland water transportation services	p61.2	16000	4.72	9270	3.58	4410	2.11
162	Air transport services (62)	p62	126000	1.5	129000	1.73	110000	1.33
163	Supporting and auxiliary transport services; travel agency services (63)	p63	37300	0.31	27000	0.411	18000	0.375
164	Post and telecommunication services (64)	p64	25200	0.116	6380	0.154	5110	0.117
165	Financial intermediation services, except insurance and pension funding services (65)	p65	19800	0.104	8200	0.138	11000	0.1
166	Insurance and pension funding services, except compulsory social security services (66)	p66	28100	0.151	6830	0.218	7680	0.136
167	Services auxiliary to financial intermediation (67)	p67	2290	0.114	2070	0.18	1480	0.127
168	Real estate services (70)	p70	125000	0.0842	12400	0.189	4930	0.0857
169	Renting services of machinery and equipment without operator and of personal and household goods (71)	p71	7060	0.186	6350	0.355	6000	0.236
170	Computer and related services (72)	p72	28900	0.135	12400	0.239	14400	0.159
171	Research and development services (73)	p73	12100	0.218	21300	0.458	7340	0.189
172	Other business services (74)	p74	44500	0.159	52000	0.2	46400	0.155
173	Public administration and defence services; compulsory social security services (75)	p75	166000	0.143	5070	0.343	3470	0.149
174	Education services (80)	p80	90800	0.0978	5480	0.396	1090	0.0975
175	Health and social work services (85)	p85	262000	0.16	9370	0.426	2770	0.155
176	Food waste to incineration	p90.1.a	1560	0.284	450	0.545	433	0.358
177	Paper waste to incineration	p90.1.b	1850	0.268	383	0.449	433	0.339
178	Plastic waste to incineration	p90.1.c	2590	0.447	493	0.88	546	0.599
179	Inert/metal waste to incineration	p90.1.d	5340	0.678	2360	0.704	2250	0.574
180	Textiles waste to incineration	p90.1.e	1080	0.842	377	1.86	251	0.916
181	Wood waste to incineration	p90.1.f	810	0.249	207	0.389	205	0.318
182	Oil/hazardous waste to incineration	p90.1.g	2180	0.326	609	0.525	636	0.412
183	Food waste to biogas treatment	p90.2.a	479	0.332	33.1	0.234	68.6	0.368
184	Paper waste to biogas treatment	p90.2.b	53.6	0.268	9.22	0.395	8.22	0.356
185	Sewage sludge to biogas treatment	p90.2.c	2020	0.262	527	0.595	405	0.349
186	Food waste to composting	p90.3.a	13800	1.49	1970	1.5	3490	1.47
187	Paper and wood to composting	p90.3.b	18.5	0.248	4.2	0.643	3.09	0.472
188	Food waste to waste water treatment	p90.4.a	5230	1.61	873	1.85	571	0.985
189	Other waste to waste water treatment	p90.4.b	8450	1.47	1160	1.44	1060	1.03
190	Food waste to Landfill	p90.5.a	19800	3.31	4340	3.03	5500	4.55
191	Paper waste to Landfill	p90.5.b	5560	1.24	1650	1.69	1350	1.48
192	Plastic waste to Landfill	p90.5.c	675	0.449	189	0.786	148	0.563
193	Inert/metal/hazardous waste to Landfill	p90.5.d	2410	0.349	721	0.598	479	0.382
194	Textiles waste to Landfill	p90.5.e	697	0.807	214	0.991	187	1.13
195	Wood waste to Landfill	p90.5.f	1020	0.695	302	1.02	185	0.756
196	Membership organisation services n.e.c. (91)	p91	60700	0.233	508	0.461	409	0.271
197	Recreational, cultural and sporting services (92)	p92	92100	0.183	6430	0.383	2420	0.192
198	Other services (93)	p93	19000	0.151	1040	0.423	338	0.157
199	Private households with employed persons (95)	p95	11100	0.189	8880	0.265	3890	0.0733
200	Extra-territorial organizations and bodies	p99	0	0	0	0	0	0
	Household		862000	0	0	0	0	0
			5.63982e+06		3.48583e+06		2.32425e+06

## Sheet: ProductBySource
			Final product:	EU	EU	EU	EU	EU	EU	EU	EU	EU	EU	EU	EU	EU	EU	EU	EU	EU	EU	EU	EU	EU	EU	EU	EU	EU	EU	EU	EU	EU	EU	EU	EU	EU	EU	EU	EU	EU	EU	EU	EU	EU	EU	EU	EU	EU	EU
				1	2	3	4	5	6	7	8	9	10	11	12	13	14	15	16	17	18	19	20	21	22	23	24	25	26	27	28	29	30	31	32	33	34	35	36	37	38	39	40	41	42	43	44	45	46
Source of emissions				Paddy rice	Wheat	Cereal grains nec	Vegetables, fruit, nuts	Oil seeds	Sugar cane, sugar beet	Plant-based fibers	Crops nec	Cattle	Pigs	Poultry	Meat animals nec	Animal products nec	Raw milk	Wool, silk-worm cocoons	Manure (conventional treatment)	Manure (biogas treatment)	Products of forestry, logging and related services (02)	Fish and other fishing products; services incidental of fishing (05)	Anthracite	Coking Coal	Other Bituminous Coal	Sub-Bituminous Coal	Patent Fuel	Lignite/Brown Coal	BKB/Peat Briquettes	Peat	Crude petroleum and services related to crude oil extraction, excluding surveying	Natural gas and services related to natural gas extraction, excluding surveying	Natural Gas Liquids	Other Hydrocarbons	Uranium and thorium ores (12)	Iron ores	Copper ores and concentrates	Nickel ores and concentrates	Aluminium ores and concentrates	Precious metal ores and concentrates	Lead, zinc and tin ores and concentrates	Other non-ferrous metal ores and concentrates	Stone	Sand and clay	Chemical and fertilizer minerals, salt and other mining and quarrying products n.e.c.	Products of meat cattle	Products of meat pigs	Products of meat poultry	Meat products nec
	Product #	Product group name	Code	p01.a	p01.b	p01.c	p01.d	p01.e	p01.f	p01.g	p01.h	p01.i	p01.j	p01.k	p01.l	p01.m	p01.n	p01.o	p01.w.1	p01.w.2	p02	p05	p10.a	p10.b	p10.c	p10.d	p10.e	p10.f	p10.g	p10.h	p11.a	p11.b	p11.b.1	p11.c	p12	p13.1	p13.20.11	p13.20.12	p13.20.13	p13.20.14	p13.20.15	p13.20.16	p14.1	p14.2	p14.3	p15.a	p15.b	p15.c	p15.d
EU	1	Paddy rice	p01.a	3.33195e+09	46547.1	29231.9	533497	18279.1	391.779	1520.37	210919	8.35636e+06	1.71683e+07	5.70228e+07	2.14161e+07	7.40489e+06	2.67993e+07	3117.82	0	0	514866	1.01788e+06	201.35	33.9011	9650.32	1234.38	184.457	152895	1525.2	745.383	29979.5	20008.7	110.857	1147.38	4562.84	216.431	2390.48	11.1126	402.046	841.737	595.294	231.53	4240.44	9031.81	32582	3.64647e+07	8.51716e+07	9.31482e+07	1.45775e+08
EU	2	Wheat	p01.b	42412.8	8.861e+09	594736	1.00739e+07	545815	11860.3	86466.1	4.04522e+07	6.4527e+07	2.89498e+07	7.39613e+07	7.2912e+07	1.54069e+07	2.86169e+07	91399.7	0	0	2.23486e+06	7.23349e+06	3962.22	1552.56	443893	1421.03	6126.51	69344.1	36709.7	29209.4	388069	496127	3782.27	17226.2	3667.66	6286.72	44553.5	1048.03	2.3708e+06	27006.9	23779.9	86957.1	127602	717505	2.48746e+06	2.25835e+08	1.54738e+08	3.83348e+08	7.08056e+08
EU	3	Cereal grains nec	p01.c	26790.2	1.22898e+06	3.48875e+09	5.98286e+06	503446	11516.8	33280.1	1.95054e+07	1.21354e+08	7.72092e+07	5.53155e+08	2.75161e+08	6.94678e+07	7.2372e+08	156406	0	0	2.10419e+06	7.76e+06	3563.32	2109.69	629089	1785.39	3391.06	156684	31151.5	71946.6	278059	347676	2196.96	14362.3	5077.57	4685.25	42866.4	320.138	26417.1	32066.7	11249.8	8084.9	79046	322480	1.11048e+06	5.26041e+08	3.64828e+08	6.57067e+08	8.23927e+08
EU	4	Vegetables, fruit, nuts	p01.d	7756.49	273784	140644	1.31272e+10	114305	2060.26	11145.2	1.96625e+06	6.48504e+06	8.68258e+06	2.9472e+07	1.06676e+07	3.42009e+06	9.30747e+06	12575.5	0	0	682266	2.38418e+06	1133.16	291.641	89375.3	895.824	1007.18	95186.2	9741.94	4802.05	87413.5	127335	683.876	2765.76	2929.73	3850.94	15065.9	73.3772	3591.71	4641.78	2484.46	1361.42	30190.7	147557	419016	4.38905e+07	6.0236e+07	2.17264e+08	3.21619e+08
EU	5	Oil seeds	p01.e	9305.52	1.01184e+06	336982	2.96769e+06	3.97827e+09	9991.98	25575.1	2.701e+06	6.67446e+06	5.7414e+06	3.61419e+07	1.5745e+07	4.36638e+06	8.43515e+06	11990	0	0	1.07199e+06	3.09603e+06	1697.18	778.967	170428	747.463	1983.34	69807.4	24944	11927.4	189432	265101	1589.18	6871.14	1689.83	4473.61	12506.9	320.848	5532.68	7805.3	4959.68	2861.6	51212.8	226036	565215	7.21856e+07	7.95444e+07	3.5883e+08	8.63019e+08
EU	6	Sugar cane, sugar beet	p01.f	27340.6	269606	104650	1.40203e+06	124763	3.35506e+08	19984.1	3.325e+06	4.23999e+06	3.65261e+06	2.25737e+07	9.22286e+06	2.22483e+06	8.5179e+06	6859.68	0	0	2.11961e+06	1.7883e+06	1474.16	322.828	104958	362.123	4532.67	2.31945e+06	28817.5	9513.27	191018	318058	341.093	3286.67	419.298	1074.99	4343.44	207.79	7624.06	3745.47	7218.85	788.763	15656.1	908785	286765	2.94353e+07	2.9329e+07	6.16292e+07	9.81032e+07
EU	7	Plant-based fibers	p01.g	376.269	16365.7	6334.3	157426	37626.1	141.692	5.05598e+08	43301.8	25706.5	15929.9	82169.1	40396.2	11715.4	19224.2	318.289	0	0	14190.9	137110	46.7112	11.1906	3427.52	243.46	53.7777	2207.63	379.981	153.455	3602.57	10254.1	59.4049	68.7908	61.8289	41.9243	149.093	11.4456	316.942	4358.96	7608.22	97.6533	3551.96	7062.29	18731.7	204728	156266	847581	1.77857e+06
EU	8	Crops nec	p01.h	4501.97	273342	109398	1.35874e+06	142467	2105.88	8001.55	4.66899e+09	6.16444e+07	7.6852e+06	4.87868e+07	1.17808e+08	2.42501e+07	7.76933e+07	35080.9	0	0	3.27543e+07	3.74673e+06	612.138	449.337	126038	192.706	641.64	30479.7	11712.6	8280.22	81564	68762.7	544.761	2049.34	493.505	1277.07	5772.97	65.1518	2184.91	2934.01	1652.27	1104.12	16801	21344	62440	2.90331e+08	6.16066e+07	8.68033e+07	1.43741e+08
EU	9	Cattle	p01.i	54592.9	2.19625e+06	826558	1.49251e+07	774315	22159.4	81303.1	2.4581e+07	1.1817e+10	5.70335e+07	2.30933e+08	9.01999e+07	2.64717e+07	5.35236e+07	761322	0	0	4.08703e+06	3.59983e+07	6865.81	2597.32	714030	4556.57	15369.9	150437	77962.4	66266.2	536062	1.34673e+06	7557.87	32808.2	5297.53	7470.39	52725.8	550.319	28417.1	40899.1	25991.4	11837.4	397467	2.91472e+06	7.90143e+06	3.16983e+10	4.29648e+08	1.62164e+09	2.85293e+09
EU	10	Pigs	p01.j	11310.9	755348	307958	4.46069e+06	275703	5862.37	10643.2	2.99367e+07	9.1716e+06	2.07902e+09	4.1579e+07	2.59576e+07	7.10628e+06	1.17994e+07	8041.95	0	0	2.1497e+06	1.22491e+07	2084.33	5591.2	1.82666e+06	990.694	2842.05	54515.3	25175.3	16962.2	131918	332467	1604.57	9661.26	1503.11	1663.03	11239.9	143.41	2723.95	10461.2	5210.31	2233.85	82239.3	501208	1.34186e+06	7.07773e+07	7.5112e+09	2.99811e+08	5.74418e+08
EU	11	Poultry	p01.k	16597.6	247835	85080.8	2.39407e+06	83691.7	2269.65	5627.96	3.57291e+06	3.13736e+06	3.55287e+06	8.08016e+09	5.72798e+06	1.90247e+06	4.22959e+06	3304.32	0	0	544101	1.32379e+06	646.618	340.732	81271.8	621.611	871.105	64101.3	7239.9	3757.78	89893.3	207949	1078.26	3620.36	1910.04	778.635	11464.3	58.0636	1354.9	6369.56	3279.01	1101.91	22925.9	101879	310651	3.27616e+07	3.39296e+07	1.65772e+09	1.77839e+08
EU	12	Meat animals nec	p01.l	10562	332981	117843	2.99704e+06	125793	2753.94	9986.68	2.264e+06	4.13649e+06	4.11452e+06	2.08405e+07	1.60114e+10	2.06064e+06	2.99587e+06	5871.31	0	0	642334	3.17429e+06	993.984	168.203	53010.3	604.067	1426.44	13004.8	38846	41834	76705.1	251284	1257.23	5469.54	490.095	1251.91	7955.13	174.379	8437.3	9477.22	6296.22	2966.26	49779.8	232324	589717	4.7883e+07	4.70958e+07	1.63152e+08	2.10264e+09
EU	13	Animal products nec	p01.m	1132.29	32355.2	12578.9	356220	14082.8	322.783	2040.16	94276.8	278136	1.2305e+06	1.46238e+06	726437	3.35789e+09	198810	89430.5	0	0	38467.8	260132	118.645	20.7946	6155.17	37.9943	87.9062	1686.04	2316.69	3131.79	8204.63	23448.1	253.918	571.118	62.2913	117.84	971.586	17.9664	386.486	1106.6	517.305	340.667	3668.2	3778.39	8447.16	2.63282e+06	5.84158e+06	1.08544e+07	3.14427e+07
EU	14	Raw milk	p01.n	61036.9	2.44071e+06	967350	1.44616e+07	847221	24090.7	75326.2	5.54826e+07	7.69845e+07	9.65067e+07	5.60312e+08	2.34953e+08	6.22485e+07	1.08925e+10	106456	0	0	6.95189e+06	4.60005e+07	8556.06	3300.84	1.15914e+06	7602.52	26082.2	436776	119272	109194	616828	1.44324e+06	5983.2	34047.7	13287	9718.57	78803.6	614.782	18722.2	59895.9	33920.5	15474.3	414496	1.9563e+06	1.53063e+07	5.31773e+08	6.26534e+08	1.94541e+09	3.78761e+09
EU	15	Wool, silk-worm cocoons	p01.o	23250.9	2.69166e+06	753729	1.41806e+07	506272	12261.5	155671	1.84095e+06	1.40614e+06	909619	4.80434e+06	2.82892e+06	1.09193e+06	5.24339e+06	6.34909e+08	0	0	1.67311e+06	1.56526e+06	3610.42	64234.3	299468	673.424	4144.74	68867.8	33879.2	8754.44	384365	340337	2460.92	6569.02	766.251	2802.51	13029.9	388.084	2861.1	16942.1	6828.26	2445.18	313109	2.91432e+06	2.44811e+07	5.91007e+06	6.41524e+06	1.19511e+07	1.06392e+07
EU	16	Manure (conventional treatment)	p01.w.1	0	0	0	0	0	0	0	0	0	0	0	0	0	0	0	0	0	0	0	0	0	0	0	0	0	0	0	0	0	0	0	0	0	0	0	0	0	0	0	0	0	0	0	0	0	0
EU	17	Manure (biogas treatment)	p01.w.2	0	0	0	0	0	0	0	0	0	0	0	0	0	0	0	0	0	0	0	0	0	0	0	0	0	0	0	0	0	0	0	0	0	0	0	0	0	0	0	0	0	0	0	0	0	0
EU	18	Products of forestry, logging and related services (02)	p02	14355.2	1.17026e+06	354519	1.16892e+07	285317	15361.1	11734.3	9.41373e+06	628237	755942	4.76737e+06	1.54505e+06	475519	2.31258e+06	2963.91	0	0	2.9007e+09	2.69266e+06	11237	2836.19	1.06542e+06	997.463	32780.9	98555.3	73979.6	52172.5	2.43132e+06	244929	570.074	2194.32	12019	4158.38	16023.7	109.386	2161.04	11203.9	4872.89	3618.82	51609.7	51267.2	346786	5.7859e+06	8.08515e+06	1.07234e+07	1.37731e+07
EU	19	Fish and other fishing products; services incidental of fishing (05)	p05	1549.94	42922	17918.5	326287	22377.3	373.051	4325.82	680846	394574	407841	3.05187e+06	1.11459e+06	314858	1.09417e+06	603.416	0	0	368160	2.9386e+09	118.563	64.2298	21384	84.4067	211.004	5260.34	1164.28	903.854	9029.79	30230.3	134.295	1286.35	242.758	147.795	3020.03	14.753	628.319	1189.85	703.548	252.13	6206.63	20517.5	98450.3	1.19383e+07	7.5674e+06	2.24563e+07	2.53695e+07
EU	20	Anthracite	p10.a	22181.7	585664	185683	7.97609e+06	207985	13216.8	9253.85	337185	406691	769437	3.18667e+06	548713	161982	337210	1545.91	0	0	358233	1.78763e+06	1.07422e+08	794.641	373598	2807.02	19652.7	33797.7	179421	5607.21	373516	130480	688.217	2582.94	11793.3	442.573	5210.28	169.512	4971.18	8293.76	2254.79	4231.63	15459.8	34708	1.67175e+06	1.90088e+06	4.98583e+06	5.2184e+06	5.51965e+06
EU	21	Coking Coal	p10.b	5274.27	2.38135e+06	1.27731e+06	9.99995e+06	1.40718e+06	34805.4	14203.7	2.05227e+06	357105	587685	4.954e+06	857242	341343	1.89356e+06	4224.35	0	0	824066	687052	52087.6	3.84877e+07	2.80961e+06	975.774	24114.1	675535	1.09457e+06	1.18382e+06	1.01576e+06	739247	11256.7	20896.8	1208.06	5680.48	80791	325.444	10342.3	71688.1	14345.6	2585.82	51965	46993.8	181319	2.98624e+06	5.54219e+06	5.88429e+06	7.5162e+06
EU	22	Other Bituminous Coal	p10.c	22080.1	8.94333e+06	3.7344e+06	8.55296e+07	3.16166e+06	56267.4	22230.1	8.43179e+06	1.1422e+06	2.04422e+06	2.84074e+07	3.90289e+06	1.52729e+06	9.95943e+06	6592.24	0	0	3.65572e+06	4.51049e+06	107514	195018	1.23657e+10	21177.5	1.43277e+06	3.65455e+06	1.01549e+06	93460.4	1.30348e+06	1.54943e+06	3990.11	5649.95	11867	37256.6	47150.4	2124.56	8775.18	43614.8	15901.3	7355.72	444326	371207	4.99134e+06	1.37928e+07	3.59014e+07	3.12778e+07	2.26802e+07
EU	23	Sub-Bituminous Coal	p10.d	878.993	24529.4	8409.85	303952	11532.7	68.8767	558.274	11362.4	17636	35304	101046	21964	5842.94	8194.13	67.2565	0	0	34240.1	72861.7	1261.67	24.9055	10104.3	1.75035e+07	211.805	301.781	221.19	64.1352	2809.21	1774.91	5.40126	39265.6	765.982	16.9026	58.9747	6.59405	85.7661	329.974	37.357	50.7968	224.874	1839.44	61442	80500.1	220908	253210	154096
EU	24	Patent Fuel	p10.e	57.4838	3.63699e+06	1.12184e+06	1.27916e+07	1.1753e+06	22945.3	342.733	2.55495e+06	78297.1	109656	4.3894e+06	861179	299553	6.73647e+06	104.643	0	0	1.00481e+06	327643	66.7695	94.1094	30972.4	684.099	4.34015e+08	771.834	7751.89	6229.96	2641.77	45809	10.7482	31.9546	15.6136	55.7726	176.075	1.24972	1033.57	148.474	121.317	62.7628	82956.4	26366.4	27624.1	1.34227e+06	4.3219e+06	3.15585e+06	565621
EU	25	Lignite/Brown Coal	p10.f	398274	5.30969e+06	2.47866e+06	2.01055e+07	3.30568e+06	74895.3	55222.9	3.51236e+06	782251	1.13978e+06	1.0799e+07	2.01246e+06	905460	5.49657e+06	3899.13	0	0	5.80352e+06	2.67218e+06	1.73669e+06	30666.9	1.19134e+07	144284	736246	1.23467e+09	1.07124e+07	13215.2	886324	269409	1246.62	4465.36	96024.7	19795.6	11717.8	1145.96	3500.92	8471.34	5596.92	3849.46	171183	81307.9	552107	5.03255e+06	1.18129e+07	1.32524e+07	1.86077e+07
EU	26	BKB/Peat Briquettes	p10.g	13082.2	726936	319157	2.97319e+06	261662	14540.7	16531.1	409302	353124	523001	1.82145e+06	481898	160338	926416	968.014	0	0	284329	508704	55570.7	210.508	224710	775.756	26912.7	37360.7	6.82955e+08	2332.71	2.44982e+06	435043	2058.18	453.883	644.388	563.422	1717.53	94.3193	1178.26	1690.36	24881.9	1083.14	13342.7	14404.1	180913	1.98469e+06	2.88496e+06	5.84865e+06	1.6004e+07
EU	27	Peat	p10.h	3796.6	220544	89399.1	3.83254e+06	24512.3	594.289	3385.74	567406	46139	365451	1.97043e+06	940349	10060	525231	149.241	0	0	131374	43395.2	1383.79	44.4978	23988.5	297.275	557.373	9703.29	230070	1.22754e+08	9578.28	25819	38.3453	4849.29	51.5745	254.056	2632.35	5.17366	152.666	4403.49	505.113	994.324	5610.64	9531.96	28478.4	232385	137560	213933	237190
EU	28	Crude petroleum and services related to crude oil extraction, excluding surveying	p11.a	130951	4.084e+07	1.94213e+07	5.02979e+07	9.86026e+06	289810	571837	1.05246e+07	3.29597e+06	2.78401e+06	1.87152e+07	9.7345e+06	2.438e+06	3.81207e+06	44311.9	0	0	1.39201e+07	2.95037e+07	13871	11085.8	3.8847e+06	41599.9	99300.2	1.02809e+06	301909	235994	1.53549e+09	1.19467e+07	22232.9	3.17267e+06	6265.46	54441.7	250515	8393.64	66193.3	163453	389053	48077.5	3.81244e+06	1.79162e+06	2.13703e+06	3.06643e+07	2.70263e+07	2.57196e+07	3.82008e+07
EU	29	Natural gas and services related to natural gas extraction, excluding surveying	p11.b	237222	9.77e+06	3.55001e+06	1.17234e+08	3.81802e+06	77704.7	322795	6.72179e+06	3.45027e+06	3.05994e+06	2.3526e+07	7.3903e+06	1.62749e+06	2.73482e+06	24538.8	0	0	8.34486e+06	1.86967e+07	38052.7	3406.71	1.3721e+06	7085.65	228160	1.10173e+07	333270	188973	2.36968e+07	1.4616e+10	96793.6	606178	17955.4	58040.5	32089.4	3392.57	55580.7	32424.1	607409	65034.6	419385	292654	5.92781e+06	3.10521e+07	2.34584e+07	5.27927e+07	6.38524e+07
EU	30	Natural Gas Liquids	p11.b.1	9193.04	2.49045e+06	1.03364e+06	4.43812e+06	1.62561e+06	7760.5	30118	1.44411e+06	163628	273627	1.30945e+06	480250	236607	957321	11383.7	0	0	1.48848e+06	631124	1692.82	678.38	201519	17331.7	142074	2.87602e+06	22931	5191.13	4.63255e+06	114405	4.38323e+08	132501	89981.6	1.80392e+06	138949	445.01	7160.37	11475.5	3215.34	26891	95289	101965	101361	1.24088e+06	3.01847e+06	4.80609e+06	3.10451e+06
EU	31	Other Hydrocarbons	p11.c	919.734	210823	88405.1	323252	58146.4	2095.81	3517.07	77861.9	37984.1	27063.4	149143	73305.5	16174.4	32808.9	351.003	0	0	193070	184448	1297.2	280.902	32129.6	977.715	301.577	12688	290504	233863	26743.9	119049	713.818	3.17421e+08	167.156	762.395	2549.38	41.4364	440.745	3941.59	4817.55	1233.21	28039.1	20293.4	8.2064e+06	260515	237986	249797	321256
EU	32	Uranium and thorium ores (12)	p12	6124.24	55188.1	20586.4	697584	17704.5	1074.08	3182.31	43303.2	25736.6	30762.2	128082	38501.7	12631.3	17214.2	214.011	0	0	39595.5	109329	563.898	25.6082	6453.69	114.51	196.956	2145.31	1641.56	1343.45	9562.64	20422.4	212.519	207.469	4.70625e+08	699.548	637.346	23.9964	564.289	1354.07	1002.61	455.542	4387.91	4695.32	29690	228268	300619	465212	446357
EU	33	Iron ores	p13.1	3187.21	136566	48853.3	935061	48430.2	1872.66	5008.46	196916	45561.2	33865.7	177906	73475.9	32323.2	71961.5	1216.47	0	0	171789	164890	1581.3	348.107	95150.1	157.713	945.586	15496.5	11176.4	2540.73	96952.1	157504	389.477	387.188	767.441	7.46155e+08	11106	196202	884255	5448.41	41028.9	2252.42	10522.7	357127	225987	303080	299817	663625	706038
EU	34	Copper ores and concentrates	p13.20.11	7466.94	1.04404e+06	665614	3.20145e+06	566216	8937.03	3797.69	1.01087e+06	81161.7	77426.9	814771	295624	119777	1.02749e+06	798.447	0	0	878912	325026	3551.86	4862.13	1.56492e+06	2533.36	83840.8	308089	25645.5	6798.96	110220	170049	646.158	20975.1	5445.09	37869.7	2.64032e+08	9154.49	1411.49	7.53835e+06	2.34799e+06	6708.7	103117	348528	1.49088e+06	865370	1.37136e+06	2.16414e+06	1.65793e+06
EU	35	Nickel ores and concentrates	p13.20.12	138.484	29224	15378.8	186759	12199.6	433.925	203.815	22926.2	14374.7	11215	54728.7	19062.1	10695.2	26529.2	47.4336	0	0	35297.1	21185.1	254.573	120.889	37480.8	23.9631	269.11	2462.15	1884.79	354.793	13938.5	24127.4	39.1786	81.5053	85.784	2162.03	10640.4	197182	932.201	12135.6	1746.01	388.477	3320.44	5944.58	16329.5	89368.2	88751.8	97761.3	143173
EU	36	Aluminium ores and concentrates	p13.20.13	360.682	31703.4	10952.2	256844	10520.4	380.395	278.621	22526.1	9083.74	9657.28	43658.2	25259.7	7589.43	14380.1	87.8771	0	0	31845.1	46265.6	227.58	72.0588	14359.6	46.6779	166.116	4543.69	2461.44	636.427	21785.1	12399.6	48.6561	326.449	113.463	454.217	908.119	720.304	3.43507e+06	727.31	637.032	201.817	1493.87	4064.41	18971	71162	78374.2	176567	171720
EU	37	Precious metal ores and concentrates	p13.20.14	186.587	27021.8	10690.6	87119.1	9098.38	199.442	212.027	19758.9	6297.47	5430.73	29458.8	9926.89	3655.27	19915.7	68.4537	0	0	23632.9	29920.4	145.956	105.634	23347.3	38.8676	979.7	2493.06	1235.27	662.917	7497.32	14946.5	40.7527	361.685	96.388	4062.13	305907	90.452	87.7734	2.34056e+07	36925.3	242.932	4180.4	7275	23123.8	35422	42878.1	76649.8	80020
EU	38	Lead, zinc and tin ores and concentrates	p13.20.15	1648.07	381341	121593	588857	86458.2	1656.89	1235.23	129475	23955.2	18354.3	125317	44053.1	16960.6	59974.3	230.361	0	0	73254.4	64581.7	726.601	296.924	59960.1	97.822	1027.01	7681.93	5779.95	1926.77	39715.9	59213.4	245.488	51891.8	232.021	2685.71	57352.6	59.2498	496.516	70431.5	6.22071e+07	2507.88	7881.26	10943.6	118964	195097	189603	288287	305326
EU	39	Other non-ferrous metal ores and concentrates	p13.20.16	3513.26	225487	103041	1.02857e+06	88906.6	1948.4	2119.85	392546	45556.2	120659	348081	483779	161655	131585	476.119	0	0	439723	126556	2023.82	660.45	221028	558.35	1598.48	71482.9	25014.7	2244.65	277364	44298.1	321.776	7582.22	1103.51	2870.46	41252.3	3901.63	5614.88	34258.4	11315.2	4.84812e+06	18568.3	23350.3	155130	371296	893660	2.0645e+06	740929
EU	40	Stone	p14.1	101575	4.19218e+06	1.06938e+06	2.9288e+07	975250	139846	30268	1.17253e+06	1.58494e+06	1.16032e+06	5.80601e+06	3.53145e+06	739755	1.21527e+06	5084.48	0	0	2.18023e+06	3.8805e+06	15454.7	1750.93	503171	367764	9090.27	193421	293449	205201	242124	257680	867.146	3701.71	3700.91	13412.3	23144	265.178	6240.82	20634.5	6670.27	6123.1	5.81786e+08	1.46406e+07	6.31012e+06	1.06488e+07	7.12143e+06	1.34017e+07	1.37546e+07
EU	41	Sand and clay	p14.2	171536	5.0237e+06	1.65408e+06	4.17818e+07	1.35254e+06	109360	49172.2	3.20313e+06	2.67755e+06	2.24699e+06	9.83731e+06	3.94517e+06	1.08332e+06	1.75222e+06	14316.8	0	0	3.47465e+06	6.03812e+06	35170.2	3320.7	805408	585570	34785	390645	309986	172272	1.02417e+06	679674	2736.18	36116	6211.04	22537.9	1.86749e+06	1118.1	11118.6	936699	106923	351986	1.06167e+08	6.99158e+08	7.03175e+07	2.17925e+07	2.18549e+07	6.25939e+07	4.89998e+07
EU	42	Chemical and fertilizer minerals, salt and other mining and quarrying products n.e.c.	p14.3	32613.2	1.80929e+06	563664	1.45276e+07	488186	24402.5	83489.9	970864	1.945e+06	988262	4.61456e+06	1.67022e+06	423004	812047	7288	0	0	1.21156e+06	4.23819e+06	2098.79	281.59	149498	427.736	10618.2	24702.3	24646.5	52816.6	107712	88995.2	605.159	1683.9	460.035	3516.04	23505.5	261.559	2389.68	9020.67	3478.04	2689.6	391086	360942	3.45723e+08	9.15104e+06	7.75004e+06	1.29688e+07	2.64565e+07
EU	43	Products of meat cattle	p15.a	881.785	28909.9	9588.67	194247	8773.92	408.056	801.964	79625.7	181646	146916	881757	367878	85413.1	157821	655.677	0	0	47451.8	744627	92.8443	25.3414	8127.73	119.43	115.327	1312.19	1734.12	1175.81	9095.6	24224.1	110.633	1137.11	38.0486	102.532	867.692	5.80367	135.24	826.207	511.405	133.738	8286.15	11389.1	32244.7	1.2989e+09	2.1346e+06	8.21712e+06	1.94913e+07
EU	44	Products of meat pigs	p15.b	1275.38	40438.7	15926.5	228990	14839.8	372.445	889.714	274826	167432	183026	935311	448439	140382	318768	359.822	0	0	103220	720070	127.206	118.218	37189.4	76.1229	118.654	2553.02	1463.76	762.97	11251.4	25921	94.8101	1412.38	52.2603	148.261	1485.81	12.4386	203.588	1034.71	563.186	162.157	5809.09	9882.93	24871.9	2.01061e+06	1.75773e+09	9.41061e+06	1.84544e+07
EU	45	Products of meat poultry	p15.c	292.212	10525	4495.48	116718	5397.44	119.854	1734.86	62002.9	42624.9	45877.7	228232	76296.1	22259.6	46476.1	476.662	0	0	18031	114405	37.6491	10.9033	3349.41	11.551	27.3664	431.553	257.95	185.798	6093.46	16314.2	88.4124	481.219	14.6752	49.3556	423.327	5.84115	138.308	427.26	212.552	103.523	1220.51	1405.81	3937	1.23078e+06	792154	2.83094e+09	2.82964e+06
EU	46	Meat products nec	p15.d	570.447	19556.4	8201.88	144544	7335.84	199.266	943.076	49373	38687.9	48002.1	231870	92760.8	32947.4	89312.7	306.658	0	0	63518.6	266919	74.5258	19.0273	5676.8	244.132	59.5788	787.692	3014.31	2301.05	6008.11	16581.3	77.9252	348.451	26.2771	63.4017	489.487	15.0131	216.287	800.363	496.23	116.905	15002.1	5707.48	7858.04	705267	710159	2.17819e+06	3.2911e+09
EU	47	products of Vegetable oils and fats	p15.e	766.947	31039.6	14561	200170	14592	290.724	2193.19	476374	1.33891e+06	1.05785e+06	5.91103e+06	2.26372e+06	719854	2.49321e+06	2293.28	0	0	85489.3	1.04205e+06	112.17	44.4676	15264.5	59.2983	273.168	3186.38	1087.34	874.623	22855.9	41672.8	139.906	870.41	100.21	149.768	1499.87	13.9059	643.698	667.892	444.149	198.425	5686.26	58316.2	138176	1.18946e+07	1.22638e+07	4.1695e+07	9.20838e+07
EU	48	Dairy products	p15.f	4140.1	150110	53456.7	889317	51508.8	1661.32	6605.13	1.59043e+06	1.44453e+06	4.97576e+06	5.13706e+07	9.10124e+06	2.60354e+06	1.75759e+07	8922.13	0	0	399429	2.53015e+06	470.15	305.935	95093.3	405.874	566.863	14951.6	6323.68	4707.27	38905.5	108724	430.167	2655.14	314.833	590.432	4771.1	39.8463	1115.11	3939.54	2166.96	1017.23	25574.3	31060.3	160435	1.08475e+07	3.0118e+07	3.47239e+07	5.03173e+07
EU	49	Processed rice	p15.g	233.761	8486.14	3282.42	48019.2	2737.32	113.33	537.187	90382.8	123978	106015	500773	198383	66217.4	91790.4	100.162	0	0	18070.9	244463	24.7192	7.80164	2663.95	12.2112	81.6902	342.48	276.95	172.544	2079.56	6548.75	45.0828	208.083	13.4865	32.7674	258.115	2.34428	76.3254	176.586	123.965	51.0019	1506.87	15700	39570.4	1.47693e+06	1.34491e+06	4.82402e+06	1.2049e+07
EU	50	Sugar	p15.h	360.663	11077.4	4167.69	173039	5009.51	126.529	1496.56	126400	590383	527491	3.48656e+06	1.41781e+06	341659	1.35756e+06	2633.25	0	0	28888.7	436930	43.88	21.1962	6580.86	15.2188	34.9595	719.956	367.273	219.254	3575.08	10009.2	38.446	290.049	26.4874	48.7746	560.705	3.39083	166.971	325.146	180.158	81.4616	1321.21	1840.71	5566.41	3.76205e+06	4.02328e+06	6.59813e+06	1.35805e+07
EU	51	Food products nec	p15.i	8135.15	319150	129741	1.96257e+06	112661	3584.77	9012.39	2.08067e+06	3.68006e+07	3.80102e+07	1.47293e+08	5.37223e+07	1.31231e+07	3.5119e+07	20254	0	0	1.09664e+06	7.62618e+06	1318.68	378.343	125568	840.319	2199.79	59495	10042.7	10388.8	152841	314769	1332.92	5605	1918.07	1573.04	9415.67	83.0161	1591.67	7286.58	4399.11	1630.07	54478.8	346885	843202	1.44611e+08	1.65888e+08	4.63266e+08	4.37632e+08
EU	52	Beverages	p15.j	10966.5	415589	178823	2.08355e+06	153872	3998.96	10240.4	1.45931e+06	2.25385e+07	1.8996e+07	8.72301e+07	2.53909e+07	6.99814e+06	2.26425e+07	4714.08	0	0	1.34956e+06	9.17914e+06	1633.03	872.613	283343	2035.86	2594.11	179323	15121.8	18901.8	204989	219347	1125.55	8872.03	7400.68	1454.46	110462	104.803	1562.36	19022.4	7969.82	2239.11	69003	145253	391615	4.38769e+07	6.306e+07	9.45828e+07	1.05519e+08
EU	53	Fish products	p15.k	1667.08	49244.7	21872.4	433606	17597.1	531.561	2683.15	213313	4.82699e+06	2.39343e+06	1.4673e+07	4.11462e+06	868538	1.33375e+06	1261.01	0	0	82818.3	2.06424e+06	213.149	31.8544	16925	127.684	982.468	1689.18	1803.14	1544.1	23096.2	33637.1	119.249	1520.06	95.956	156.881	1569.2	20.9817	4919.29	1124.05	876.19	477.314	13747.9	203340	500848	2.07437e+07	1.14357e+07	9.37023e+07	1.03496e+08
EU	54	Tobacco products (16)	p16	310.354	11685.2	6223.79	225568	16348.5	130.748	6706.24	52555.3	4261.83	3159.87	17276	12348.2	13186.1	5318.84	478.402	0	0	33674.6	49330.7	98.1023	8.76039	2635.4	74.2085	495.61	42599.6	13900.2	11224.1	9949.82	20873.4	146.794	188.604	25.809	54.2427	430.576	11.1241	233.811	308.356	159.282	118.998	3540.6	2032.64	5384	55635.8	35072.5	68613.6	81272.8
EU	55	Textiles (17)	p17	5414.53	315105	125235	2.23336e+06	106056	3725.93	13042.8	306376	100153	81530.2	447429	237396	82844	193213	1211.52	0	0	454866	3.61607e+06	626.887	407.769	123053	840.803	331.712	99405.9	5940.41	1853.06	31369	21814.3	129.638	879.577	2723.4	767.814	1432.1	53.0804	3196.64	1040.27	577.107	503.694	7998.8	9043.23	28511	942104	775800	1.33284e+06	1.4841e+06
EU	56	Wearing apparel; furs (18)	p18	5433.62	145983	57320.6	1.00434e+06	56426.3	536.971	16232.7	146601	20797.4	32539.9	181994	77363.7	33598.2	104771	4615.29	0	0	396470	445407	448.799	153.327	49885.4	392.85	144.651	44528.5	2234.02	1187.64	29199.9	24544.2	282.726	1062.65	734.532	228.381	1032.77	18.1568	1516.69	755.765	422.725	420.688	17623.3	6637.12	15015.5	172775	300237	547478	486637
EU	57	Leather and leather products (19)	p19	206.738	59749.8	12551	188816	10118.4	228.828	492.228	26920.5	6627.8	11771.3	48543.1	23061.3	10148.9	25726.7	129.727	0	0	25449	58523.2	101.9	68.8942	22843.2	33.6436	44.7121	3861.16	733.233	120.722	7132.23	1789.13	17.2344	83.8969	26.0365	30.6214	120.699	8.66344	137.142	69.8993	63.8449	37.5796	796.303	1185.77	2018.12	55084.1	73882	139283	129391
EU	58	Wood and products of wood and cork (except furniture); articles of straw and plaiting materials (20)	p20	48536.5	2.68071e+06	846090	2.59547e+07	617371	31335.8	21455.5	1.23642e+06	1.99503e+06	2.09383e+06	6.69442e+06	2.37551e+06	567737	1.47167e+06	5243.52	0	0	4.91634e+06	9.66309e+06	119036	2875.12	1.44734e+06	15579.1	66527.5	165964	182868	41819.8	349117	172253	772.594	4023.73	3830.44	4649.82	8621.47	428.29	4074.62	10920.1	5510.02	4869.66	63877.3	74733.3	568292	7.09831e+06	1.22408e+07	1.80261e+07	1.68865e+07
EU	59	Wood material for treatment, Re-processing of secondary wood material into new wood material	p20.w	0	0	0	0	0	0	0	0	0	0	0	0	0	0	0	0	0	0	0	0	0	0	0	0	0	0	0	0	0	0	0	0	0	0	0	0	0	0	0	0	0	0	0	0	0	0
EU	60	Pulp	p21.1	19060.7	1.66165e+06	828073	1.13141e+07	647818	17866	35804.9	1.61824e+06	1.22655e+06	1.15304e+06	5.41862e+06	2.0158e+06	634706	2.26247e+06	5348.32	0	0	2.2305e+06	2.36226e+06	13729.2	4145.05	1.38874e+06	7746.4	12200	596255	107241	45845.5	697608	759154	4084.85	5984.11	3664.02	4255.85	262500	287.523	8962.54	40858.3	35612.3	6213.52	91668	72544	526437	1.98725e+07	1.97407e+07	6.33343e+07	3.16048e+07
EU	61	Secondary paper for treatment, Re-processing of secondary paper into new pulp	p21.w.1	0	0	0	0	0	0	0	0	0	0	0	0	0	0	0	0	0	0	0	0	0	0	0	0	0	0	0	0	0	0	0	0	0	0	0	0	0	0	0	0	0	0	0	0	0	0
EU	62	Paper and paper products	p21.2	38384.2	1.89711e+06	990179	1.73561e+07	549530	16332.8	21792.1	1.43227e+06	2.69745e+06	2.82486e+06	9.84006e+06	3.53656e+06	987417	2.30625e+06	7615	0	0	2.52685e+06	4.07231e+06	5860.76	1571.2	485336	5543.12	3809.35	127676	38401.9	64879.2	376112	237066	944.148	4960.54	3153.75	4160.6	16979.5	210.076	5262.35	25938.1	8165.67	8644.85	127412	97395.8	879193	4.02192e+07	5.43843e+07	1.23842e+08	6.18044e+07
EU	63	Printed matter and recorded media (22)	p22	34124.1	2.27425e+06	703525	1.28742e+07	533151	40945.4	22487.7	1.06621e+06	701323	856192	3.64356e+06	1.49088e+06	474796	1.14335e+06	3431.51	0	0	2.08162e+06	2.16267e+06	11436.6	2223	698933	4923.03	5793.39	278393	77533.8	29992.1	485500	366589	1769.79	8330.44	2789.85	4470.5	13873.3	177.033	3066.58	26328.7	38165.4	8583.12	245780	112554	212756	7.61262e+06	9.2366e+06	1.30172e+07	1.90293e+07
EU	64	Coke Oven Coke	p23.1.a	78193.6	2.75449e+06	1.30887e+06	1.26084e+07	1.21132e+06	33099.6	47121	2.11264e+06	1.25965e+06	1.15231e+06	6.29242e+06	2.03579e+06	587955	2.17033e+06	19753.2	0	0	2.20633e+06	3.81319e+06	17475.9	6809.68	2.09196e+06	2868.73	13633.4	223558	167175	69416.5	2.44341e+06	3.23952e+06	51460.9	7594.04	4829.74	16211.6	144209	4610.38	30053.1	131943	29481.6	10971.3	293988	205420	893567	1.85565e+07	1.5065e+07	2.01928e+07	2.15458e+07
EU	65	Gas Coke	p23.1.b	0	0	0	0	0	0	0	0	0	0	0	0	0	0	0	0	0	0	0	0	0	0	0	0	0	0	0	0	0	0	0	0	0	0	0	0	0	0	0	0	0	0	0	0	0	0
EU	66	Coal Tar	p23.1.c	13565.4	702338	236076	2.61406e+06	213518	8728.26	19958.3	676052	174822	160505	842668	264016	71159.9	190274	1583.19	0	0	423675	695570	7663.5	1690.99	238900	579.196	2796.31	66170.6	77642.6	12908.6	84945.4	158877	1369.51	8834.62	733.383	2191.62	3009.75	526.21	2482.44	13059.8	3120.27	2784.04	21169.5	20331.1	79184.8	1.42832e+06	1.90335e+06	2.92726e+06	2.60259e+06
EU	67	Motor Gasoline	p23.20.a	169685	1.76033e+07	7.31399e+06	4.90084e+07	8.20329e+06	251534	373007	1.04435e+07	2.25496e+06	1.8422e+06	1.52709e+07	5.93177e+06	1.51961e+06	8.31077e+06	65720.6	0	0	1.01656e+07	2.27045e+07	10264.4	6499.95	1.66485e+06	18118.5	8480	156036	149820	92096.2	1.69591e+06	4.64246e+06	12805.5	41368.4	2913.31	32551.3	69724.8	4120.75	50177.9	61091.6	63781.5	28557.7	2.3546e+06	675896	636761	2.10218e+07	1.9887e+07	2.65108e+07	2.46946e+07
EU	68	Aviation Gasoline	p23.20.b	669	7343.61	3577.56	24085	4838.15	128.322	574.191	11825.7	1384.2	1359.25	9795.63	3412.04	1059.87	4743.45	28.8545	0	0	8574.9	67602.3	13.8794	10.5682	2966.6	7.07473	63.3197	1337.24	2197.27	1285.96	2611.41	4606.86	13.1762	38.9802	3.65926	21.5659	25.1725	0.553744	39.7272	40.9949	32.4298	18.619	534.659	475.554	1999.32	12794	13536.8	15637.5	19080.6
EU	69	Gasoline Type Jet Fuel	p23.20.c	12.5622	1754.25	14599.6	4419.76	7565.82	17.4379	391.163	1244.05	1446.85	1803.93	3438.11	1995.92	905.752	2608.68	6.34017	0	0	5551.26	4224.69	2.91667	0.822664	189.085	4.56612	1.97032	109.628	63.2966	74.1237	196.23	836.353	0.944902	8.86498	2.34045	13.4758	10.6785	0.157564	8.29861	14.8764	5.23321	29.4916	555.28	998.037	1072.01	5290.11	5842.99	6589.9	18274.6
EU	70	Kerosene Type Jet Fuel	p23.20.d	19800.3	1.25988e+06	560052	5.93105e+06	497577	15375.2	126090	1.05675e+06	227332	202270	1.40117e+06	451684	150385	531198	5972.83	0	0	1.18681e+06	1.26112e+06	3450.57	1508.02	504178	4350.72	10058.7	34534	35090.1	19841.9	539631	855720	3190.59	3163.32	936.848	1929.01	3993.88	97.4113	7502.94	9344.39	3072.44	2626.68	465047	205048	294161	2.07158e+06	2.08795e+06	2.78574e+06	3.36844e+06
EU	71	Kerosene	p23.20.e	137776	1.00013e+06	308768	6.52155e+06	297610	25604	83080.2	792791	298534	263867	1.31784e+06	524162	137665	255214	4139.11	0	0	497264	3.78794e+06	3084.1	129.244	30036.9	668.989	834.311	11939.5	45645.8	33851.8	69037.8	116586	805.114	3457.42	1077.77	2239.38	3224.66	2387.61	11803	5293.64	2366.28	3579.3	48510.5	42878.9	66584.9	1.93165e+06	1.74586e+06	2.69494e+06	2.83369e+06
EU	72	Gas/Diesel Oil	p23.20.f	837718	9.78328e+07	4.15179e+07	2.44023e+08	4.03779e+07	1.72312e+06	1.11908e+06	4.4054e+07	1.29376e+07	1.07927e+07	8.07255e+07	2.7135e+07	7.28156e+06	3.72224e+07	49800.3	0	0	3.65002e+07	4.6302e+07	35698.3	22062.1	5.77748e+06	30418.9	29324.9	328408	255184	90337.5	2.69345e+06	5.05139e+06	24328.1	41012.5	7194.43	40694.4	157981	2556.97	204695	146909	111990	78446.2	3.74709e+06	1.78349e+06	1.91639e+06	7.63262e+07	7.96312e+07	8.52436e+07	9.17054e+07
EU	73	Heavy Fuel Oil	p23.20.g	40407	3.26787e+06	1.63368e+06	1.44696e+07	1.53759e+06	49362.5	95539	3.37702e+06	1.04874e+06	934806	5.20147e+06	2.14334e+06	628209	1.6406e+06	17815.3	0	0	2.33313e+06	1.26897e+07	12847.1	1768.46	496921	28060	9126.29	99916.4	101792	74371.5	1.01325e+06	1.47472e+06	40958.8	26659.2	12300.8	35001.5	202746	2244.98	118485	205310	603250	37359.1	1.19208e+06	1.59859e+06	888513	1.29152e+07	1.26817e+07	1.61201e+07	1.95545e+07
EU	74	Refinery Gas	p23.20.h	3656.86	266254	113136	835354	105142	4866.48	6043.35	132145	37687.8	35785.1	246747	76509.4	22948.3	97822.1	431.166	0	0	105138	184214	208.111	89.3308	23471.1	152.648	366.032	3904	3731.83	2364.48	40054.9	74929.8	446.369	2548.58	120.013	287.805	832.401	151.694	999.569	806.182	1277.59	368.428	15310.2	8657.88	10393.7	262395	288254	331924	357261
EU	75	Liquefied Petroleum Gases (LPG)	p23.20.i	19023.9	1.96967e+06	770718	6.92647e+06	1.1054e+06	34242.4	430980	1.15779e+06	452161	362332	2.66323e+06	900004	281894	1.02653e+06	48525.4	0	0	682331	2.07828e+06	5360.39	1606.55	439599	615.824	5322.46	53474	54992.7	19834.5	837381	2.13153e+06	4292.33	12612.3	826.765	9537.11	144941	548.019	7586.45	23809.8	4810.69	17369.3	66366	81507	148225	3.96221e+06	4.06781e+06	7.04322e+06	8.01449e+06
EU	76	Refinery Feedstocks	p23.20.j	18592.6	2.18333e+06	929859	6.21741e+06	951136	40984.1	157980	1.24365e+06	287923	285719	1.86614e+06	602972	188443	880921	3658.13	0	0	891922	1.55193e+06	1651.61	744.495	199121	710.642	2073.31	33551.4	27866.3	17883.1	1.03016e+06	346798	1943.7	28516.3	556.668	3077.1	8072.76	1205.47	9695.39	5490.57	5644.58	3189.77	76252.3	56732.8	79617.8	2.72416e+06	2.80043e+06	3.54666e+06	3.24049e+06
EU	77	Ethane	p23.20.k	57.0957	7709.85	2875.56	15191.9	2997.07	27.2913	366.988	3766.27	638.932	822.36	3780.22	1571.59	616.826	1742.13	13.769	0	0	2934.79	2329.74	11.4943	4.61958	1194.1	3.28471	15.8175	924.364	98.6394	40.5864	2248.26	991.784	3.26371	55.5502	3.36008	52.7331	25.9733	2.72048	15.2639	24.2437	28.1295	8.9649	129.713	169.93	2280.85	9019.73	9094.82	18547.7	10656.2
EU	78	Naphtha	p23.20.l	123726	1.11002e+06	571003	6.25518e+06	416040	13733.1	43230.8	772902	255568	216907	1.09343e+06	401306	125781	359260	3920.21	0	0	530873	823308	4906.8	813.323	220223	820.527	3503.6	54273.6	34954.5	17828.5	207209	213328	2766.59	6765.25	1562.46	9678.82	11297	44809.5	7909.21	14118.4	16299.6	4505.13	811330	124942	206669	2.18646e+06	2.48717e+06	4.22557e+06	3.81697e+06
EU	79	White Spirit & SBP	p23.20.m	58818	555338	262342	2.56044e+06	160670	8167.04	10116.3	371614	111197	85607.5	503730	200667	68603.9	132931	1297.81	0	0	289088	616125	2228.49	617.521	204539	582.528	15118.2	70914.8	119958	55822.6	51988.9	161065	1255.46	5886.41	348.353	818.066	3168.03	196.097	8251.44	4252	5246.08	2348.1	120156	128460	59314.4	755719	728599	887850	1.0525e+06
EU	80	Lubricants	p23.20.n	8107.87	817118	323065	2.60148e+06	300950	18271.9	21256.4	490572	129670	130950	923213	298688	92149.4	486424	1074.52	0	0	371305	485685	659.678	917.914	268685	765.696	1633.74	15225.3	11585.4	5626.36	64567.6	137191	771.104	1714.51	280.837	637.079	7677.36	225.406	1823.99	5415.75	4262.65	998.513	90362.3	38389.5	36963.8	979900	1.41688e+06	1.71367e+06	1.38395e+06
EU	81	Bitumen	p23.20.o	15015.1	1.52057e+06	767288	4.40201e+06	868636	19673.9	24321.5	1.12264e+06	193544	152946	1.44266e+06	494474	172963	1.04341e+06	2856.09	0	0	794382	1.54899e+06	935.636	3026.34	1.92184e+06	3771.69	111508	719588	959393	865087	279174	1.11256e+06	1247.22	120119	4131.24	4699.6	8041.03	797.445	6280.55	5892.8	6062.01	2350.45	98872.9	51543.4	95025.6	1.49303e+06	1.67308e+06	2.34626e+06	1.92785e+06
EU	82	Paraffin Waxes	p23.20.p	2560.95	152607	67973.9	551151	71159.2	2843.25	3187.89	107564	24328	20369.6	162209	53773	16222.8	87335.1	260.93	0	0	70798.8	188222	133.612	315.676	130108	410.962	3941.77	47336.2	16759.6	12735.6	10261.1	47541.4	285.047	22910.3	118.271	190.115	768.961	134.526	677.321	706.005	754.858	267.435	9517.65	5939.06	8917.57	171710	196076	228218	233714
EU	83	Petroleum Coke	p23.20.q	1827.37	85876.5	31726.2	503592	29304.3	1002.81	2755.24	55421.3	21185.5	18162.2	96112	38687.7	18381	32709.7	475.418	0	0	59054.1	146208	652.069	36.1657	14227.7	511.56	280.168	30921.6	1839.4	893.86	99529.8	69361.5	157.592	389.331	120.203	426.464	571.013	55.8898	624.302	545.044	1008.53	212.913	12941.5	10239.4	12403.9	149797	161022	223669	231704
EU	84	Non-specified Petroleum Products	p23.20.r	3607.08	337345	134630	1.27366e+06	120436	7217.66	27284.1	184391	64365.4	59940	369051	128806	38180.1	112018	730.638	0	0	157330	372215	1169.82	334.559	111146	260.366	1099.76	20021	30900.9	23250.6	64864.7	121458	738.001	1828.15	631.051	3588.59	1883.63	282.327	4224.47	2076.65	2504.31	1539.97	46933.8	49644.7	30230.7	545565	545187	789520	800468
EU	85	Nuclear fuel	p23.3	11107.6	105816	45911.7	1.05077e+06	33332.1	1897.75	71916.2	125730	64517.9	33146	251515	120388	31294.1	101354	402.479	0	0	78675.9	134889	306.16	121.981	17328.5	97.5819	375.59	3958.23	5929.73	96243.6	15119.6	35846.9	372.611	398.343	250.243	641.555	3183.26	32.6898	679.927	23489.5	3825.15	5397.31	5785.72	20002.4	31134.7	905445	810017	1.55718e+06	1.57983e+06
EU	86	Plastics, basic	p24.a	145238	6.34176e+06	2.28326e+06	5.23476e+07	1.98654e+06	116218	106073	5.18209e+06	3.02275e+06	2.84301e+06	1.38106e+07	5.03628e+06	1.43649e+06	4.76305e+06	12885.2	0	0	5.66602e+06	9.31902e+06	157450	30162	9.46099e+06	31255.4	75105.1	892137	636637	258755	1.82325e+06	2.76859e+06	57024.8	25631.4	51436.5	14445.9	261902	4630.16	52904.4	974340	559807	138604	224832	300314	1.00373e+06	2.9512e+07	4.30602e+07	9.39387e+07	6.01651e+07
EU	87	Secondary plastic for treatment, Re-processing of secondary plastic into new plastic	p24.a.w	0	0	0	0	0	0	0	0	0	0	0	0	0	0	0	0	0	0	0	0	0	0	0	0	0	0	0	0	0	0	0	0	0	0	0	0	0	0	0	0	0	0	0	0	0	0
EU	88	N-fertiliser	p24.b	1.20236e+06	2.61052e+07	9.48184e+06	3.19652e+07	5.21262e+06	125963	316947	5.78929e+06	1.15581e+06	629488	2.95428e+06	3.21544e+06	357461	1.62437e+06	2093.4	0	0	1.55642e+07	282969	7410.45	2294.48	595350	1256.78	559.639	77583.9	239568	188988	83614	305683	316.508	1212.12	404.817	1265.28	1033.36	252.608	4047.43	885.641	1263.79	877.093	7302.74	7742.83	27357.3	1.10379e+07	2.62176e+06	3.57176e+06	5.27576e+06
EU	89	P- and other fertiliser	p24.c	2.47621e+06	9.51987e+07	6.9865e+07	2.98814e+08	5.41126e+07	601749	2.58301e+06	5.20994e+07	7.83116e+06	4.35508e+06	2.36941e+07	1.35252e+07	4.14264e+06	3.56022e+07	55491.4	0	0	3.18946e+06	1.1705e+07	7767.48	6127.98	1.79881e+06	8453.85	3225.47	1.03964e+06	180094	123009	187021	474535	544.121	2787.78	26033.5	4810.28	41572.1	215.425	30403.3	50269.5	9274.49	12113.7	16291.7	41979.3	115334	2.99225e+07	2.19061e+07	3.80065e+07	5.75405e+07
EU	90	Chemicals nec	p24.d	614313	1.11664e+07	7.28138e+06	6.09727e+07	8.42172e+06	98065.5	449711	1.34751e+07	917957	752276	5.91418e+06	2.97627e+06	807049	7.63309e+06	83325.6	0	0	3.83003e+06	1.1743e+07	25801.7	8118.25	2.49953e+06	3297.96	4077.13	107916	108525	64353.5	1.69557e+06	1.19823e+06	7590.39	38652.8	2498.41	17972	31757.3	7790.87	50147.6	15979.7	15912.3	14718.1	239092	137467	379633	1.56034e+07	1.1443e+07	1.97094e+07	1.66255e+07
EU	91	Charcoal	p24.e	354.368	50576.2	4381.5	31507.3	3043.71	36.4414	297.841	80927.3	2016.98	1128.56	7157.45	4216.02	1626.8	8435.88	11.7386	0	0	50549.3	11742.1	20.4543	6.76349	21856.1	19.9272	2259.49	4093.67	2930.3	3109.22	127260	9504.97	1.96076	70.3131	3.4938	213.255	429.621	9.55929	193.811	134.972	279.586	228.82	382.797	293.035	508.263	9607.74	12776.6	45185.1	31070
EU	92	Additives/Blending Components	p24.f	2144.63	180899	84507.1	773965	92578.1	4516.1	8540.1	228177	24128.9	17890.5	121738	49261.8	17798.2	37325.1	442.86	0	0	53034.7	238714	7712.74	4604.56	1.42848e+06	750.257	2065.99	43626.9	30544.4	3215.08	2.24577e+06	83085.8	258.95	760.809	102.763	1432.03	841.793	26.2452	306.322	2077.05	3212.26	137.413	8707.97	4580.04	7232.76	162234	136499	208893	261557
EU	93	Biogasoline	p24.g	2293.21	83992.1	57509.7	322605	75770.9	1524.04	588.383	103935	7923.35	9291.82	63137.5	22619.2	7762.16	84650.6	41.9735	0	0	28210.4	176083	56.8825	71.6593	22936.6	12.7776	152.102	1955.39	273.252	187.219	5640.59	6888.91	26.7084	141.308	35.7146	265.703	369.09	7.41273	110.701	574.188	269.723	294.56	2178.69	1471.33	5088.37	126928	130987	176252	122328
EU	94	Biodiesels	p24.h	25095.1	1.29689e+06	561753	4.93478e+06	467092	33871.8	5168.05	1.5656e+06	122409	76019.6	437283	190385	43974.9	155148	322.766	0	0	319446	950733	1780.66	166.234	56828.3	85.7772	2423.25	9149.74	12895.4	11472	1.31051e+06	116326	628.969	1435.19	126.087	2461.57	39793.6	22.7435	536.833	3206.87	1263.49	1074.6	11199.2	19753.7	29646.9	734358	737407	1.12911e+06	1.44658e+06
EU	95	Other Liquid Biofuels	p24.i	1552.12	425064	111757	560792	89705	9960.24	190.743	158900	18212.3	10629.1	72511.3	25360.6	10013.6	23137.3	82.5626	0	0	77149.3	100008	420.77	13.4009	4640.42	7.30752	200.829	1202.67	3401.69	620.309	128844	3984.41	17.1455	127.397	15.8523	245.01	363.649	4.54809	125.032	188.09	170.061	59.65	1448.06	3716.92	7001.71	110394	92783.1	172552	297715
EU	96	Rubber and plastic products (25)	p25	50490.9	2.46771e+06	933100	2.15786e+07	653915	34030.3	45807.8	1.73046e+06	2.09294e+06	1.50552e+06	6.69243e+06	2.35483e+06	590810	1.8158e+06	4654.54	0	0	1.74274e+06	4.79155e+06	11661.2	7258.73	2.14027e+06	1796.8	9978.68	160999	341068	169393	323992	560330	1695.71	5735.21	4107.26	2798.95	16309.5	230.439	5885.22	18523.8	7964.05	6931.62	71477.9	99187.8	425038	1.40255e+07	2.01654e+07	7.17377e+07	3.42552e+07
EU	97	Glass and glass products	p26.a	563155	1.14207e+07	3.54394e+06	1.8257e+08	2.9976e+06	109764	59494.2	6.21456e+06	8.01228e+06	5.76129e+06	2.99107e+07	1.16907e+07	3.56909e+06	1.26333e+07	18714.3	0	0	5.64094e+06	1.29397e+07	48093.1	17846.5	5.91898e+06	7424.17	73591.9	287506	350419	171733	670622	1.00971e+06	3282.84	9313.62	9940.35	8104.83	45883.3	871.469	17901.6	34875.3	17212.4	9009.78	248075	212832	1.85278e+06	4.31606e+07	5.60721e+07	8.5825e+07	1.118e+08
EU	98	Secondary glass for treatment, Re-processing of secondary glass into new glass	p26.a.w	0	0	0	0	0	0	0	0	0	0	0	0	0	0	0	0	0	0	0	0	0	0	0	0	0	0	0	0	0	0	0	0	0	0	0	0	0	0	0	0	0	0	0	0	0	0
EU	99	Ceramic goods	p26.b	35779.3	768044	268059	1.00068e+07	251202	14986.2	19004.1	751452	261348	209180	1.19393e+06	546561	186770	399605	26787	0	0	1.1126e+06	1.11096e+06	7453.99	1451.1	429416	1100.94	4075.35	83878.5	49658.4	5983.2	183570	163694	624.609	3751.11	5359.43	3357.44	8106.95	115.349	2221.01	8417.2	4760.96	1592.64	53395.2	109955	248262	2.08996e+06	2.26686e+06	4.77943e+06	5.21479e+06
EU	100	Bricks, tiles and construction products, in baked clay	p26.c	26369.3	941065	301433	8.22118e+06	251325	18101.8	29328.6	565496	210824	182096	1.12504e+06	425337	134088	307203	2280.98	0	0	866164	985721	7497.18	1181.92	365277	6300.45	3878.16	130114	52087.8	10991.9	173116	90943.4	716.551	3335.31	1022.11	2054.35	39028.3	95.9632	1609.95	10396.9	4997.44	1485.63	170554	92081	352315	1.45851e+06	1.7059e+06	2.81995e+06	3.54281e+06
EU	101	Cement, lime and plaster	p26.d	587319	2.29126e+07	8.07852e+06	1.79068e+08	6.50869e+06	480710	519728	1.58022e+07	5.40396e+06	4.39176e+06	2.59343e+07	9.06462e+06	2.9902e+06	9.45474e+06	45939.1	0	0	3.40279e+07	2.01635e+07	181078	56475.8	1.7469e+07	342304	121162	3.68447e+06	1.23011e+06	181699	4.37647e+06	2.55683e+06	16477.9	35054.3	22025.9	127184	746539	2656.13	26119.4	653818	122773	29470.1	4.66612e+06	4.17616e+06	9.75992e+06	3.11202e+07	4.29096e+07	7.04819e+07	7.67657e+07
EU	102	Ash for treatment, Re-processing of ash into clinker	p26.d.w	0	0	0	0	0	0	0	0	0	0	0	0	0	0	0	0	0	0	0	0	0	0	0	0	0	0	0	0	0	0	0	0	0	0	0	0	0	0	0	0	0	0	0	0	0	0
EU	103	Other non-metallic mineral products	p26.e	222714	8.004e+06	2.34657e+06	8.81629e+07	1.97576e+06	130747	55670.3	3.51816e+06	3.18819e+06	3.29145e+06	1.46706e+07	5.23944e+06	1.49645e+06	6.08469e+06	49646.6	0	0	3.90992e+06	6.28198e+06	26790.7	4157.42	1.15801e+06	74839.9	14179.5	214844	149702	39820.5	714848	1.85121e+06	3936.26	10534.2	7914.61	6318.68	78990.4	652.937	13914.3	66482.7	20873.6	14668.9	1.07501e+06	685673	1.0287e+06	2.13064e+07	2.52928e+07	3.2712e+07	3.60611e+07
EU	104	Basic iron and steel and of ferro-alloys and first products thereof	p27.a	175389	1.79092e+07	6.45688e+06	1.13064e+08	6.0779e+06	295791	153871	1.31463e+07	4.52937e+06	3.64289e+06	2.49339e+07	8.85249e+06	2.57582e+06	1.39983e+07	29026.7	0	0	2.6805e+07	1.97548e+07	294144	90841	2.75878e+07	39515.7	154221	4.27934e+06	1.92286e+06	293929	1.63688e+07	1.40519e+07	36054.6	38633.7	72525.3	32490.5	1.99698e+06	4337.03	205194	1.99519e+06	321347	117289	570257	603160	3.30737e+06	3.07196e+07	3.70952e+07	6.7063e+07	6.08434e+07
EU	105	Secondary steel for treatment, Re-processing of secondary steel into new steel	p27.a.w	0	0	0	0	0	0	0	0	0	0	0	0	0	0	0	0	0	0	0	0	0	0	0	0	0	0	0	0	0	0	0	0	0	0	0	0	0	0	0	0	0	0	0	0	0	0
EU	106	Precious metals	p27.41	2138.22	412219	202604	1.98012e+06	228429	5146.94	5008.81	544213	123334	74822.4	632002	233449	67421.7	510247	1616.98	0	0	296922	288358	4014.98	3775.44	894295	353.227	3152.29	21621.8	31331.5	9244.72	298840	103010	874.237	1496	677.259	702.066	241887	152.098	1866.82	238813	34931.6	6120.12	20490.2	19450.9	179820	1.14467e+06	887686	1.74254e+06	1.56287e+06
EU	107	Secondary preciuos metals for treatment, Re-processing of secondary preciuos metals into new preciuos metals	p27.41.w	0	0	0	0	0	0	0	0	0	0	0	0	0	0	0	0	0	0	0	0	0	0	0	0	0	0	0	0	0	0	0	0	0	0	0	0	0	0	0	0	0	0	0	0	0	0
EU	108	Aluminium and aluminium products	p27.42	37257.8	2.8876e+06	1.02723e+06	1.90502e+07	972691	41724.2	27078.3	2.20787e+06	1.13927e+06	866217	4.91659e+06	1.83126e+06	533218	2.60632e+06	4783.22	0	0	2.50379e+06	3.78675e+06	37035.6	12769.7	4.02236e+06	4941.49	22257.7	424908	292411	104743	1.82802e+06	2.72839e+06	5684.81	7202.56	14516.6	5061.68	262860	1035.16	10305	265764	46596.1	14541.8	111762	113717	514748	8.36511e+06	8.41802e+06	1.73854e+07	1.55586e+07
EU	109	Secondary aluminium for treatment, Re-processing of secondary aluminium into new aluminium	p27.42.w	0	0	0	0	0	0	0	0	0	0	0	0	0	0	0	0	0	0	0	0	0	0	0	0	0	0	0	0	0	0	0	0	0	0	0	0	0	0	0	0	0	0	0	0	0	0
EU	110	Lead, zinc and tin and products thereof	p27.43	4984.68	446328	180874	2.9367e+06	197257	4644.46	3371.34	495258	145926	92209.8	616441	226317	74103.3	373483	578.601	0	0	291093	329221	3359.96	2889.88	542675	320.779	2116.78	36810.5	23552.5	7773.26	95402.7	225768	562.428	1096.78	3046.81	777.904	210528	181.044	1362.01	233182	28745.6	12805.9	31294.7	33816	174556	727715	894940	1.61288e+06	1.17222e+06
EU	111	Secondary lead for treatment, Re-processing of secondary lead into new lead	p27.43.w	0	0	0	0	0	0	0	0	0	0	0	0	0	0	0	0	0	0	0	0	0	0	0	0	0	0	0	0	0	0	0	0	0	0	0	0	0	0	0	0	0	0	0	0	0	0
EU	112	Copper products	p27.44	19727.3	1.2705e+06	441935	8.74253e+06	424356	19468.1	13543.3	997279	395192	283026	1.81153e+06	723037	208688	831954	2416.99	0	0	1.15537e+06	1.42607e+06	18048.3	7100.68	1.79121e+06	1706.14	10183.7	186579	120308	16708	606118	592061	2182	3103.77	5170.97	4209.73	367416	269.461	15266.4	374842	52541.2	41114.3	60064.1	66200.2	405547	2.44077e+06	2.49089e+06	4.82626e+06	4.77217e+06
EU	113	Secondary copper for treatment, Re-processing of secondary copper into new copper	p27.44.w	0	0	0	0	0	0	0	0	0	0	0	0	0	0	0	0	0	0	0	0	0	0	0	0	0	0	0	0	0	0	0	0	0	0	0	0	0	0	0	0	0	0	0	0	0	0
EU	114	Other non-ferrous metal products	p27.45	1606.3	196731	67036.1	1.24137e+06	56998.5	2763.84	1748.95	148198	71211.4	48070.7	304797	105566	32055	107855	493.701	0	0	190592	243747	2219.96	575.097	154608	237.55	1690.47	18446.2	19855.7	7641.42	121900	143856	636.892	575.17	570.255	537.147	27569.8	60.1864	793.953	27535.6	4746.07	1858.83	9105.25	10708.8	54358.5	451981	401821	807261	981375
EU	115	Secondary other non-ferrous metals for treatment, Re-processing of secondary other non-ferrous metals into new other non-ferrous metals	p27.45.w	0	0	0	0	0	0	0	0	0	0	0	0	0	0	0	0	0	0	0	0	0	0	0	0	0	0	0	0	0	0	0	0	0	0	0	0	0	0	0	0	0	0	0	0	0	0
EU	116	Foundry work services	p27.5	28541.5	3.36468e+06	1.14473e+06	2.44073e+07	929316	62357.7	24099.6	1.98102e+06	1.37884e+06	911430	5.4272e+06	1.84023e+06	505393	1.35764e+06	6363.01	0	0	3.27158e+06	3.68158e+06	76253.3	7891.82	2.06872e+06	3944.08	46053.5	395977	508296	49344.8	6.78711e+06	3.5518e+06	22277.9	6748.51	7894.07	9887.37	62941	602.806	10975.3	60797	22906.9	13140.3	159528	165399	670493	7.97755e+06	7.5954e+06	1.17216e+07	1.24517e+07
EU	117	Fabricated metal products, except machinery and equipment (28)	p28	84654.7	5.30892e+06	1.85548e+06	4.62453e+07	1.52626e+06	74513.8	33448.4	3.57875e+06	1.6077e+06	1.54242e+06	8.75468e+06	2.82024e+06	788902	5.13608e+06	5546.21	0	0	4.40842e+06	6.45656e+06	47436.4	23220.5	7.63707e+06	6505.16	50832.1	571873	473667	199492	2.19016e+06	1.16858e+06	4235.91	8851.94	44156	5290.09	50719.8	518.671	11010.5	41121.4	15376	10857.6	125649	109155	607056	1.08969e+07	1.46154e+07	3.18661e+07	2.22825e+07
EU	118	Machinery and equipment n.e.c. (29)	p29	21988.3	5.04603e+06	1.28322e+06	2.48732e+07	1.50549e+06	103328	12110.4	1.85626e+06	416290	388477	2.1544e+06	829717	234725	926454	4197.18	0	0	3.46257e+06	2.45237e+06	9029.88	3378.84	745176	2109.55	24634.8	217068	216463	113173	788001	852127	5554.58	3392.15	4281.8	2136.2	11882.4	353.639	11454.8	8937.7	6358.14	10554.7	210918	214799	269023	2.91973e+06	2.85939e+06	7.56471e+06	7.54615e+06
EU	119	Office machinery and computers (30)	p30	8634.42	216225	60216	3.07025e+06	61300.9	1510.71	21302.2	306940	86799.8	83478.5	489207	184927	60241.6	184092	2442.95	0	0	300940	1.6563e+06	464.299	221.055	102001	220.429	4454.24	21366	4222.55	1945.04	74035.4	67533	377.221	391.414	222.264	116.11	900.072	19.0138	268.981	9584.06	699.353	251.189	9541.32	5891.22	20544.4	556016	791969	1.15638e+06	1.861e+06
EU	120	Electrical machinery and apparatus n.e.c. (31)	p31	1.72608e+06	8.43378e+06	2.18477e+06	2.518e+08	2.74519e+06	90691.1	442411	3.94052e+06	3.64207e+06	3.04847e+06	1.84661e+07	8.7182e+06	2.3974e+06	4.78672e+06	13887.5	0	0	6.2403e+06	2.57459e+07	344374	26811.6	8.98425e+06	10442.6	158340	1.46632e+06	2.13737e+06	46929.4	6.98778e+06	1.97704e+06	10331.1	26692.7	10512.7	12635.2	76795.2	691.455	25830.5	69814.1	37084.4	27582.3	236484	257864	1.35255e+06	1.88476e+07	2.17745e+07	3.39394e+07	4.7267e+07
EU	121	Radio, television and communication equipment and apparatus (32)	p32	50975.7	1.06982e+06	390132	6.14559e+06	543616	8323.01	431390	1.18719e+06	231561	225836	1.59789e+06	849767	289128	723818	2526.64	0	0	983430	5.96066e+06	5774.11	2072.5	694087	2445.19	5945.27	246364	54172.9	30406.6	551805	159411	1134.7	9791.29	4164.1	5770.1	6474.15	99.8083	1601.33	12669.1	6787.8	5198.52	53768.7	36805.6	309023	1.49828e+06	2.08049e+06	3.04088e+06	4.81449e+06
EU	122	Medical, precision and optical instruments, watches and clocks (33)	p33	20121.2	781121	225123	3.61161e+06	184625	5753.9	30447.1	646609	197020	155999	1.47865e+06	665822	175633	376624	2549.05	0	0	513500	4.91877e+06	8067.33	2050.65	966399	2809.86	38458.2	34032.9	177877	109827	226443	292453	1336.21	2115.25	622.259	1699.55	6955.05	104.026	1555.13	24682.6	109082	1865.39	127386	55729	145450	1.35818e+06	1.38266e+06	2.63071e+06	4.26157e+06
EU	123	Motor vehicles, trailers and semi-trailers (34)	p34	5459.54	732705	254340	3.15926e+06	218417	11525.6	9044.48	482200	258733	182192	978331	427773	125987	414123	2891.66	0	0	1.29118e+06	466559	2508.52	752.988	246816	419.243	6322.87	46631.5	31433.4	13105.4	205713	279820	885.608	2379.03	1306.4	959.645	4771.28	74.2832	2287.73	4344.29	2728.54	1675.02	43376.3	25831.3	101489	1.21485e+06	1.34189e+06	2.69691e+06	2.40657e+06
EU	124	Other transport equipment (35)	p35	17619.2	296672	103495	2.25999e+06	105359	4557.32	14825.8	445576	131817	174369	663465	240548	87275.6	279525	5556.87	0	0	746107	1.74728e+07	10054.7	1259.1	418973	1839.76	2208.87	61956.2	17826.5	9035.96	162450	194310	586.895	1889.63	2824.82	2363.31	10369.8	438.482	4031.89	20994.9	3957.37	4818.75	39162.6	48002.6	151086	1.1572e+06	1.57801e+06	2.38901e+06	2.74658e+06
EU	125	Furniture; other manufactured goods n.e.c. (36)	p36	35228.3	973041	274984	1.12007e+07	327041	4569.53	622997	1.64703e+06	431147	605215	2.03276e+06	700662	230913	765694	2938.31	0	0	1.72596e+06	8.57989e+06	3518.13	3031.53	981004	1094.14	1038.14	36374.8	14833.8	6444.74	94354.3	108165	717.039	2490.58	2040.78	1161.36	9186.71	192.886	2354.07	12448.4	2987.51	2599.81	57989.8	45607.6	165948	2.36548e+06	4.13268e+06	7.03994e+06	5.72883e+06
EU	126	Secondary raw materials	p37	35299	7.63063e+06	3.35485e+06	3.4393e+07	3.88675e+06	90896.8	508754	8.25888e+06	1.0389e+06	1.12669e+06	1.25443e+07	3.69895e+06	1.24846e+06	1.30575e+07	5775.9	0	0	5.21646e+06	3.74314e+06	35234.3	46644.4	1.49873e+07	3663.11	18668.8	301224	238807	58654.3	1.2896e+06	2.28191e+06	10527	18715.4	12203.3	7646.94	1.02705e+06	845.419	21376.1	767861	156023	21272.7	140356	178246	1.30419e+06	1.14371e+07	2.36859e+07	3.48857e+07	2.48582e+07
EU	127	Bottles for treatment, Recycling of bottles by direct reuse	p37.w.1	0	0	0	0	0	0	0	0	0	0	0	0	0	0	0	0	0	0	0	0	0	0	0	0	0	0	0	0	0	0	0	0	0	0	0	0	0	0	0	0	0	0	0	0	0	0
EU	128	Electricity by coal	p40.11.a	2.14288e+06	1.1703e+08	6.6384e+07	2.20988e+09	4.55281e+07	1.87522e+06	2.2657e+06	6.51945e+07	7.16814e+07	1.31265e+08	1.00347e+09	1.43748e+08	4.73214e+07	1.37728e+08	216233	0	0	1.94333e+08	3.80964e+08	9.26723e+06	163613	6.27046e+07	731186	3.53345e+06	2.86572e+07	5.25684e+07	2.39577e+06	6.82937e+07	4.69211e+08	2.72632e+06	255547	4.54977e+06	107140	469615	17080.4	238113	649458	508671	215990	5.55676e+07	2.13387e+07	3.34866e+07	5.58415e+08	9.21035e+08	1.11131e+09	1.41534e+09
EU	129	Electricity by gas	p40.11.b	589793	1.10844e+07	3.88305e+06	6.63518e+08	5.75739e+06	118703	452840	9.45494e+06	2.90959e+07	2.46025e+07	2.16968e+08	3.68036e+07	6.8127e+06	1.072e+07	43786.3	0	0	2.45515e+07	1.26694e+08	522818	10108.7	8.94942e+06	144036	856357	629234	2.27307e+06	1.23553e+06	6.3806e+06	2.14273e+08	1.23842e+06	30675.8	282696	13781.1	82606.2	3737.37	61001.3	263903	149979	123579	5.43118e+06	5.43701e+06	1.37922e+07	2.41351e+08	1.6298e+08	4.2381e+08	3.52033e+08
EU	130	Electricity by nuclear	p40.11.c	2145.77	406749	104108	3.1929e+06	86859.2	1868.68	1770.61	150989	66910.5	128574	1.62109e+06	143024	57190.8	107412	475.538	0	0	189404	197820	5260.76	866.925	103802	291.057	2269.61	40929	69190.2	17510.6	67459.9	2.16578e+06	12524.2	1405.56	453.124	1225.22	919.575	75.5482	306.097	1356.69	1696.68	834.259	21443.1	16137.5	41500.2	1.0205e+06	1.24248e+06	1.3383e+06	1.05169e+06
EU	131	Electricity by hydro	p40.11.d	4196.75	412886	240881	3.49566e+06	163155	2818.24	6360.95	587290	108203	166730	1.11555e+06	318032	113698	848513	342.035	0	0	446269	410692	2294.99	8675.28	2.86596e+06	996.356	821.434	47486.4	9652.31	4340.38	43004.8	120877	660.429	1892.05	997.96	696.494	1987.89	31.5622	553.471	3940.29	4421.35	1650.29	122121	63769.4	104525	861632	1.7031e+06	2.51998e+06	1.10617e+06
EU	132	Electricity by wind	p40.11.e	35890.7	4.72539e+06	2.23621e+06	5.1753e+07	1.79052e+06	14651.3	59486.7	6.68295e+06	1.01073e+06	2.51052e+06	1.79532e+07	2.90725e+06	995676	7.51417e+06	5058.85	0	0	2.11933e+06	3.03291e+06	36332.5	114553	3.6805e+07	5699.04	6895.24	602495	148780	17333.7	688895	1.01871e+07	59104.2	11280.4	20238	8542.13	12266.6	783.1	5874.19	19547.7	12130.1	21949.6	403839	321633	846445	2.05184e+07	2.55292e+07	3.41492e+07	1.59647e+07
EU	133	Electricity by petroleum and other oil derivatives	p40.11.f	307431	4.28141e+06	938096	1.37754e+08	3.45016e+06	28254.4	405330	2.1643e+06	5.03455e+06	1.08151e+07	4.36265e+07	1.70293e+07	3.84904e+06	6.57726e+06	16320.7	0	0	4.28845e+06	3.13706e+07	300078	4361.24	1.68076e+06	56281.3	38970.2	323766	388069	83794.1	1.34962e+06	965029	2664.44	10851.3	153141	2799.6	33355.7	1531.25	22935.2	206359	18117.8	14060.8	2.71927e+06	1.51724e+06	2.72893e+06	2.46668e+07	6.88593e+07	8.10948e+07	1.09551e+08
EU	134	Electricity by biomass and waste	p40.11.g	21949.7	2.4244e+06	1.04927e+06	5.45762e+07	743393	46625.3	30755.3	1.58653e+06	1.38091e+06	2.41042e+06	2.10735e+07	2.81238e+06	944308	2.10521e+06	4074.35	0	0	3.12931e+06	9.19966e+06	198116	7503.5	2.77223e+06	7918.55	84307.9	270470	1.22041e+06	37750.7	1.47226e+06	3.11779e+06	18438.7	3782.81	49246.3	2669.92	9691.57	246.143	4399.6	10972.9	12780.7	12227.6	867632	346951	579180	1.76336e+07	1.90911e+07	1.78393e+07	3.4304e+07
EU	135	Electricity by solar photovoltaic	p40.11.h	6191.11	801297	259662	7.92806e+06	198900	15500.8	2781.53	400347	362002	678540	5.62415e+06	660396	248558	456326	956.025	0	0	270819	1.08714e+06	75818.8	783.792	318442	185.566	33993.9	63629.6	471453	3732.39	496119	401458	2619.88	473.313	444.4	1104.4	3837.2	86.3806	730.058	2432.39	2373.54	834.839	10066.7	18129.8	35173.6	2.33733e+06	4.89861e+06	3.86208e+06	6.61606e+06
EU	136	Electricity by solar thermal	p40.11.i	3749.08	21943.7	4718.04	614090	18175.6	332.077	2489.64	14352.5	36617.5	72002.9	169761	37342.2	8959.89	15895.1	114.755	0	0	13267.4	137078	2564.7	6.75623	3129.84	368.804	51.1877	411.453	470.181	203.437	23646	5933.53	29.7102	23.4305	1592.64	12.6855	114.775	24.9524	245.005	613.732	1361.6	110.606	642.853	2980.52	15734.6	132839	456788	634450	334799
EU	137	Electricity by tide, wave, ocean	p40.11.j	13279.6	24421.3	5880.84	161094	54744.6	1552.56	3407.11	27217.5	13314.9	10827	85357	28206.9	6222.88	7727.89	290.12	0	0	45449	799470	27.0092	10.6246	1579.6	8.67096	4074.13	179.858	547.595	388.506	70185.5	12465.4	76.4448	40.6767	7.29573	22.1773	112.56	44.5843	290.779	126.346	13095.6	2480.26	1291.36	793.513	2154.97	142547	137844	667865	270565
EU	138	Electricity by Geothermal	p40.11.k	106.725	38901.6	14431.3	276338	19630.8	4757	242.85	65476.9	12680.7	27877.2	205930	26511.9	9973.41	16450.6	1896.06	0	0	52786.7	96127.9	3451.51	12.5435	11370.4	6.60086	1473.44	1884.08	21002.9	112.977	135115	4148.13	29.76	59.7552	13.3922	372.199	86.9156	3.17602	38.9772	87.5414	265.997	29.727	497.778	1148.17	3855.48	97880.1	215064	203310	285300
EU	139	Electricity nec	p40.11.l	27633	1.17265e+06	408276	4.50848e+07	410761	21054.4	15873.3	549816	860280	1.34146e+06	1.12398e+07	1.61086e+06	468472	796271	2329.55	0	0	2.69525e+06	1.13348e+07	97643.1	913.796	436406	2491.58	42259.4	94713.5	527658	9264.99	575987	508749	3246.83	1853.46	25001.3	1085.58	5185.97	181.882	3464.52	8532.3	9038.74	3414.48	33137.6	53055.2	164518	5.52358e+06	1.05101e+07	1.3431e+07	2.42847e+07
EU	140	Transmission services of electricity	p40.12	7770.47	3.25547e+06	1.11009e+06	6.20863e+07	876146	68668.5	19588.2	1.85483e+06	1.4822e+06	2.9803e+06	3.77699e+07	2.88413e+06	979393	2.13315e+06	4470.18	0	0	1.4729e+06	3.54533e+06	292307	5902.21	2.28625e+06	2975.95	125479	209945	1.79977e+06	21825.6	2.05299e+06	3.74947e+07	219523	6252.56	5981.95	3040.05	11222.3	277.516	3540.66	11572.9	12782.4	4524.01	334272	189879	424088	1.34606e+07	2.46051e+07	1.83437e+07	3.01805e+07
EU	141	Distribution and trade services of electricity	p40.13	69999.2	2.27904e+06	690769	9.20954e+07	633883	23105.3	14376.6	1.4063e+06	987130	1.23059e+06	1.60474e+07	2.39986e+06	648631	1.2768e+06	3274.21	0	0	4.36916e+06	1.71838e+07	51674.3	4255.64	1.20171e+06	1260.28	23724	86164.9	339707	18078	528979	6.70701e+06	39250.3	5377.95	2926.65	1844.13	7794.37	219.501	4245.88	10419.3	14589.9	5391.34	130657	88039.7	246637	1.04815e+07	1.32926e+07	2.08688e+07	3.71625e+07
EU	142	Coke oven gas	p40.2.a	285.611	63658.5	27561.9	506504	19140	851.639	410.719	26514	42554.3	31619.7	176574	51755.1	30141.5	34001	96.141	0	0	67419.1	59619.4	645.308	151.061	38700.1	39.994	333.011	4217.42	7253	2549.75	28014.7	34007.2	148.383	113.622	69.888	440.511	1083.1	11.5225	180.777	938.287	353.368	505.993	4757.42	12443.4	11682.7	259150	214061	201239	396762
EU	143	Blast Furnace Gas	p40.2.b	654.738	137622	72407.3	1.66724e+06	39190.9	2177.24	984.38	43690.6	169894	123867	684189	188724	117227	91463.2	209.751	0	0	198950	161742	2421.65	127.38	40903.1	85.1174	1125.25	6173.01	15726.3	1716.73	55733.6	103019	544.885	327.773	168.909	1159.52	1741.79	16.0475	295.751	1512.07	656.202	1130.35	15540.8	46851.5	32621.9	988404	734285	596884	1.43501e+06
EU	144	Oxygen Steel Furnace Gas	p40.2.c	23.3689	4872.42	1387.85	24676.4	1206.16	67.7806	23.5849	2092.53	739.709	801.318	5343.83	1564.08	569.765	1722.24	7.03991	0	0	4005.45	4027.65	70.8665	11.2938	2412.98	2.30442	35.338	432.802	563.81	41.7934	4109.34	1882.34	17.4965	6.02975	6.89302	11.5509	72.5784	1.63554	17.1354	61.8149	19.8661	14.5772	99.039	92.2517	405.206	6141.16	8908.22	12445.5	15099.1
EU	145	Gas Works Gas	p40.2.d	8.67294	9340.53	2938.69	11335.5	2014.6	20.2386	42.3404	2636.43	737.061	1155.14	4724.71	1203.1	941.368	5474.25	7.23556	0	0	5733.35	1942.04	12.6944	39.7215	4044.97	0.764396	6.78972	1654.83	934.498	19.8855	3437.74	7902.47	1.20108	14.2673	1.71392	37.3334	19.7069	2.1727	3.91177	11.262	5.88805	7.3258	256.56	72.0229	271.54	4797.75	10467.3	11481.3	7848.97
EU	146	Biogas	p40.2.e	2694.42	1.01783e+06	289176	7.77865e+06	199156	15317.5	9277.8	301756	316663	524039	3.96232e+06	533178	223796	353104	850.838	0	0	331736	451447	42561.5	247.453	156884	184.972	18252.6	29288.6	260646	2257.47	393213	97017.1	652.422	541.059	305.896	828.939	1511.07	37.8664	529.785	1647.86	1804.13	818.765	16495.7	32224	32857.8	2.37778e+06	3.80156e+06	2.78926e+06	6.03978e+06
EU	147	Distribution services of gaseous fuels through mains	p40.2.1	82919.7	9.10358e+06	2.9429e+06	1.16156e+08	2.45305e+06	214643	74237.8	3.94271e+06	5.06116e+06	4.47088e+06	3.69949e+07	9.74945e+06	2.84896e+06	4.15145e+06	21476.2	0	0	1.29331e+07	2.13357e+07	78746.5	2272.43	694661	6493.86	38144.2	163144	440631	44255.3	1.67259e+07	1.301e+06	7830.69	9428.2	22864	15778.6	27532.5	924.745	16695.7	38259.7	50184.5	18582.1	491331	674751	950410	4.55345e+07	3.38475e+07	7.10837e+07	1.32306e+08
EU	148	Steam and hot water supply services	p40.3	118807	4.07023e+07	1.99457e+07	1.36841e+08	9.69661e+06	223296	132435	1.98783e+07	6.04205e+06	7.66488e+06	6.87104e+07	1.82583e+07	6.8595e+06	1.87673e+07	34894.6	0	0	5.47417e+07	2.53252e+07	347354	386842	1.20916e+08	24247.5	163203	5.41774e+06	2.89475e+06	107461	1.37886e+07	2.81008e+07	157978	583221	88536.1	113928	118271	8647.84	27521.8	60572.2	49443.1	30631.7	935749	999865	8.04846e+06	7.00747e+07	9.21673e+07	1.61786e+08	1.46258e+08
EU	149	Collected and purified water, distribution services of water (41)	p41	75545.7	8.60239e+06	2.71216e+06	6.3379e+07	2.08831e+06	81901.8	25462.1	4.15347e+06	973943	1.91632e+06	1.05094e+07	3.33644e+06	1.11083e+06	7.77018e+06	2488.12	0	0	5.93206e+06	2.2571e+06	40540.5	32119.9	1.06288e+07	485.482	18314.2	136486	258391	10047.2	293532	821458	7514.66	9646.53	745.831	2302.12	15618.2	161.809	2730.09	14518.9	15894.3	2209.69	30943.4	39921.2	479471	9.20986e+06	2.09313e+07	2.56398e+07	2.41497e+07
EU	150	Construction work (45)	p45	200217	1.74184e+07	5.4948e+06	1.32357e+08	4.48956e+06	610411	151425	6.81302e+06	1.68758e+06	1.73013e+06	1.00895e+07	3.0265e+06	975845	2.64525e+06	25768.3	0	0	1.12826e+07	4.68429e+06	217976	8526.33	2.41965e+06	7249.75	100337	827490	1.42614e+06	37317.9	3.57563e+06	1.60316e+06	10213.3	7419.65	3970.55	13745.5	30252.3	974.426	8319.51	39139.2	44759.4	8325.06	312176	235201	472284	1.13537e+07	1.95297e+07	2.15836e+07	4.431e+07
EU	151	Secondary construction material for treatment, Re-processing of secondary construction material into aggregates	p45.w	0	0	0	0	0	0	0	0	0	0	0	0	0	0	0	0	0	0	0	0	0	0	0	0	0	0	0	0	0	0	0	0	0	0	0	0	0	0	0	0	0	0	0	0	0	0
EU	152	Sale, maintenance, repair of motor vehicles, motor vehicles parts, motorcycles, motor cycles parts and accessoiries	p50.a	406468	6.57303e+06	2.32987e+06	2.79891e+07	2.22391e+06	157238	89077.1	3.46223e+06	3.18608e+06	2.84203e+06	1.32015e+07	3.7627e+06	1.12791e+06	2.51651e+06	23407.9	0	0	5.57854e+06	6.86375e+06	32294.1	2834.54	787409	2768.96	30197.3	223280	373908	127224	2.08873e+06	2.95471e+06	17349.9	39321.5	21331.4	6726.62	19367	604.687	3888.2	27252.6	22816.1	9156.4	265068	350862	805046	1.55583e+07	2.10515e+07	2.84366e+07	2.71058e+07
EU	153	Retail trade services of motor fuel	p50.b	43442.8	8.55945e+07	2.36392e+07	8.16591e+07	1.33155e+07	30970.6	31953	4.13226e+07	3.32489e+07	1.21508e+07	5.67979e+07	2.00663e+07	3.84503e+06	4.60325e+06	32091.1	0	0	1.36242e+07	8.27859e+06	5066.47	3158.62	1.13126e+06	1594.08	65770.5	123213	128147	47833.6	684205	194117	2925.6	11140.3	3767.33	6146.45	12129.7	520.346	8383.99	15500.4	27997.5	3045.61	104086	308777	845016	2.93858e+07	9.93204e+06	3.5353e+07	4.9164e+07
EU	154	Wholesale trade and commission trade services, except of motor vehicles and motorcycles (51)	p51	625681	1.04652e+07	4.39687e+06	4.38591e+07	4.04028e+06	422962	287765	6.31878e+06	5.64698e+06	5.86431e+06	2.9508e+07	1.00333e+07	2.94727e+06	4.62227e+06	58251.4	0	0	1.03304e+07	1.38021e+07	53119.7	4594.13	1.01002e+06	10628.5	63960.1	412832	512024	150179	1.30548e+06	1.66976e+06	47798.1	48001.4	31471.4	22133	315889	1196.08	10198.7	105109	46862.6	30380.1	1.10062e+06	1.11299e+06	2.65927e+06	6.18059e+07	4.70708e+07	7.44386e+07	7.78104e+07
EU	155	Retail trade services, except of motor vehicles and motorcycles; repair services of personal and household goods (52)	p52	771301	6.36534e+06	3.36679e+06	1.66579e+07	2.81013e+06	149917	564029	3.82083e+06	2.08305e+06	1.91842e+06	1.37313e+07	8.14551e+06	1.70611e+06	1.94282e+06	85401.4	0	0	6.3281e+06	8.98155e+06	19492.3	867.276	315402	97615.9	31036.4	407990	1.62564e+06	1.25363e+06	953375	1.52758e+06	12710.4	676440	45505.5	11615.4	463445	519.394	3568.34	274444	57917	21475.3	3.66899e+06	2.87043e+06	5.49166e+06	2.64943e+07	1.69806e+07	2.56351e+07	3.21104e+07
EU	156	Hotel and restaurant services (55)	p55	53647.6	1.19765e+06	427487	8.83953e+06	381101	11298.1	36864.3	868132	664682	424234	2.27782e+06	1.07865e+06	289576	595472	6989.22	0	0	1.3191e+06	1.55701e+06	4957.89	2040.15	617363	1815.3	8316.43	122679	44014.1	14125.4	324555	1.23294e+06	5435.26	31328.2	3010.68	6241.55	57240.7	174.662	2959.24	39240	25542.9	6345.58	131407	189333	407028	4.34252e+06	4.57676e+06	8.62511e+06	1.19635e+07
EU	157	Railway transportation services	p60.1	2.11326e+06	1.4608e+07	4.78567e+06	7.57846e+07	6.73271e+06	1.4739e+06	1.4603e+06	3.46589e+06	9.5082e+06	6.63918e+06	5.43344e+07	2.58778e+07	4.11399e+06	7.30359e+06	26730	0	0	2.41695e+07	3.16806e+07	28926.2	21658.3	5.79905e+06	35363.4	72560.9	3.26761e+06	786538	492902	2.69096e+06	2.03808e+06	10589.9	62685	91676.2	18469.7	83805.4	8689	58279.3	254862	215636	61180.5	1.5851e+06	1.91418e+06	2.41871e+06	1.04207e+08	6.50024e+07	1.63551e+08	1.73343e+08
EU	158	Other land transportation services	p60.2	160980	8.07593e+06	2.38503e+06	2.4364e+07	2.05312e+06	82983.1	464301	4.54839e+06	4.24342e+06	3.69547e+06	1.64368e+07	5.48838e+06	1.83633e+06	4.90705e+06	35252.4	0	0	1.43809e+07	6.75667e+06	15049.4	9873.8	1.63498e+06	59132.7	13439.7	408517	302290	107865	735510	2.42447e+06	12907.5	29618	7977.66	15333.8	66273.2	2390.32	11594.5	91965.7	27153	22208.7	8.05058e+06	2.4197e+06	2.37967e+06	3.5169e+07	4.87613e+07	9.33708e+07	5.95275e+07
EU	159	Transportation services via pipelines	p60.3	1.41616e+06	3.15824e+07	9.33328e+06	9.62654e+07	9.92212e+06	1.969e+06	1.33233e+06	1.08144e+07	1.42246e+07	8.55495e+06	6.43625e+07	3.0704e+07	5.138e+06	8.81061e+06	117574	0	0	2.46292e+07	2.96053e+07	75646.3	70921.6	2.0206e+07	177426	411939	1.82449e+06	6.44234e+06	5.10033e+06	5.31e+07	4.33473e+07	531223	203881	8122.56	117929	1.61765e+06	100026	134369	3.03301e+06	1.04831e+07	53030.1	862295	914264	1.81067e+06	1.07627e+08	5.76812e+07	1.51346e+08	1.65534e+08
EU	160	Sea and coastal water transportation services	p61.1	5.04824e+06	5.10547e+07	1.72712e+07	2.15781e+08	1.69367e+07	1.45046e+06	6.12646e+06	3.89438e+07	1.77654e+07	1.61219e+07	1.0202e+08	5.03793e+07	1.4398e+07	1.6318e+07	196199	0	0	5.91121e+07	4.3938e+08	394626	18270.7	5.26519e+06	48550.5	272015	1.70933e+06	2.66455e+06	526563	3.2634e+07	3.30076e+07	155624	2.43237e+06	46401.8	173309	380007	33215.2	237735	506770	481317	198476	6.31353e+06	9.66342e+06	4.19962e+07	1.91468e+08	3.86936e+08	4.12791e+08	7.46133e+08
EU	161	Inland water transportation services	p61.2	1.06772e+06	3.42808e+06	1.3216e+06	1.63241e+07	1.43193e+06	191345	967094	3.21498e+06	1.42723e+06	1.40813e+06	8.87095e+06	4.07977e+06	1.01225e+06	1.83413e+06	34961.1	0	0	5.23415e+06	5.10878e+07	28284.6	1853.71	356698	40379.3	22572.2	698910	242407	72869	5.95146e+06	9.41498e+06	42383.6	99049.5	232903	25745	4.01012e+06	1115	22395.6	311283	231157	14003.2	5.21714e+06	1.67085e+07	3.522e+06	1.60118e+07	1.71099e+07	2.67769e+07	3.61521e+07
EU	162	Air transport services (62)	p62	590771	1.8739e+07	7.03902e+06	1.16094e+08	6.44523e+06	414193	1.39298e+06	1.31453e+07	1.06752e+07	8.2038e+06	4.07775e+07	1.72785e+07	5.119e+06	9.13807e+06	156873	0	0	2.62285e+07	3.95362e+07	87679.4	15655.4	4.62814e+06	842823	145117	1.53403e+06	1.40955e+06	1.5746e+06	9.10394e+06	2.1621e+07	57209.5	228542	43812.4	81449.9	306773	3125.91	206948	1.03313e+06	188455	243282	1.04828e+08	3.53224e+07	4.57997e+07	1.38806e+08	9.26494e+07	1.60036e+08	2.15547e+08
EU	163	Supporting and auxiliary transport services; travel agency services (63)	p63	811980	1.80588e+07	4.82471e+06	6.914e+07	5.21758e+06	460671	1.21956e+06	8.14224e+06	6.22454e+06	6.21746e+06	3.77591e+07	1.59971e+07	3.99402e+06	8.07721e+06	68588.8	0	0	1.58854e+07	3.44241e+08	52999.8	23001.2	4.22363e+06	27167	28675.3	1.55278e+06	696050	309641	2.99629e+06	2.64146e+06	11602.6	83793.1	29771.2	20290.4	155063	2222.36	42314.1	281931	97250.7	86941.8	2.88745e+06	1.89295e+06	2.59119e+07	9.43815e+07	2.10814e+08	1.85196e+08	2.6544e+08
EU	164	Post and telecommunication services (64)	p64	101054	6.06004e+06	2.17887e+06	3.1033e+07	2.67584e+06	58520.4	540295	7.8443e+06	1.24878e+06	1.12169e+06	1.24968e+07	4.61059e+06	1.52889e+06	1.25469e+07	6630.23	0	0	5.51679e+06	5.1862e+06	10776.6	45795.4	1.50292e+07	6893.81	7522.52	209469	75420.4	26371	729881	743143	6371.02	12330	4389.85	6210.83	298993	470.997	5175.48	321661	63453.5	9045.96	243861	132464	1.15772e+06	1.12416e+07	2.6295e+07	4.52412e+07	2.43569e+07
EU	165	Financial intermediation services, except insurance and pension funding services (65)	p65	188291	7.23399e+06	1.64698e+06	6.24326e+07	1.52862e+06	111371	443215	2.21985e+06	2.23448e+06	1.74589e+06	1.08349e+07	4.58434e+06	1.07733e+06	3.23011e+06	7219.17	0	0	5.345e+06	9.73582e+06	7530.05	4382.79	1.26525e+06	2219.13	11389.7	242364	69456.1	18526.6	738507	1.09149e+06	6096.21	5869.98	6643.74	1811.17	16512.3	275.381	29530.7	15712	308376	3995.59	69933.3	74866.4	222855	2.14179e+07	3.3376e+07	3.11717e+07	3.63689e+07
EU	166	Insurance and pension funding services, except compulsory social security services (66)	p66	168860	4.7926e+06	1.33284e+06	3.38983e+07	1.45869e+06	45177.1	702837	2.39214e+06	632822	545700	6.27558e+06	2.52602e+06	684250	5.34275e+06	3163.99	0	0	1.39289e+06	1.02747e+07	3094.87	2966.91	954814	1069.57	2385.25	82917	25903.1	8467.81	902474	222619	1312.68	2738.74	1341.18	1101.25	6568.4	81.5878	3727.59	5761.23	6389.82	2131.65	67698.5	75666.4	510781	4.37071e+06	6.95731e+06	1.26367e+07	1.77587e+07
EU	167	Services auxiliary to financial intermediation (67)	p67	82930.2	1.78036e+06	313151	3.67603e+07	341965	17105.9	30123.4	701230	464582	398588	2.51993e+06	1.01158e+06	225377	567199	1467.04	0	0	1.36605e+06	2.47846e+06	2131.3	532.247	161138	578.191	2278.68	23060.3	16844.8	29578	163846	181758	926.139	3457.53	675.494	1169.22	8814.06	60.8275	4348.19	10206	43567.9	3539.8	31432.7	33446.9	72356	3.44159e+06	5.33137e+06	5.49896e+06	6.80013e+06
EU	168	Real estate services (70)	p70	128954	3.93407e+06	1.2686e+06	1.67052e+07	1.28134e+06	84391.6	569310	2.36455e+06	850688	1.1568e+06	5.68752e+06	2.61079e+06	906842	2.48336e+06	5294.52	0	0	3.08277e+06	3.11811e+06	15767.5	4102.54	1.19423e+06	2098.82	8520.8	280631	149665	47437.1	962174	549186	3591.96	7603.07	2161.01	3819.49	22994.5	278.996	3520.11	22346	15228.3	4947.78	104462	95875.8	2.19096e+06	8.47817e+06	3.11275e+07	2.28039e+07	3.49764e+07
EU	169	Renting services of machinery and equipment without operator and of personal and household goods (71)	p71	177802	1.58782e+07	5.1995e+06	6.62984e+07	3.24374e+06	432398	424228	9.14537e+06	4.16351e+06	4.80913e+06	1.9491e+07	9.2239e+06	2.2299e+06	5.98318e+06	12262.6	0	0	1.46518e+07	6.73427e+06	36870.3	15534	4.82649e+06	3986.72	33306.8	1.08991e+06	220072	177363	5.4921e+06	8.44567e+06	36179	51389.5	16604.4	16032.6	190231	1409.42	10939.1	137582	62343.1	39471	447218	510495	2.36811e+07	2.82362e+07	3.79798e+07	4.54039e+07	5.75023e+07
EU	170	Computer and related services (72)	p72	40185.4	2.63103e+06	947230	1.9101e+07	738739	37384	39183.4	1.94809e+06	896977	882804	4.97939e+06	1.68871e+06	495524	1.79384e+06	5578.33	0	0	2.46147e+06	2.21686e+06	15566	7821.97	2.53312e+06	2158.95	21654.7	169310	115190	31642.1	2.02615e+06	1.7961e+06	10511.9	36562.6	6156.9	5829.24	22760.5	306.833	4136.66	31931.4	22325.9	9007.81	159358	119543	583533	1.05408e+07	1.12456e+07	1.74463e+07	2.33774e+07
EU	171	Research and development services (73)	p73	58164.6	1.17163e+06	417292	1.72968e+07	388216	13674.9	19197.7	766306	526688	517559	2.11615e+06	948683	219351	449408	3817.5	0	0	1.00038e+06	2.2214e+06	10625.8	1080.41	340508	1507.56	3876.81	100989	33234.2	17919.9	374252	381234	1973.92	10705.5	6083.96	8314.25	11681.9	265.604	3259.84	168799	21483.4	65829.9	40232.1	70046.6	175232	3.89919e+06	4.17688e+06	6.70421e+06	8.20531e+06
EU	172	Other business services (74)	p74	512709	3.89233e+07	1.24072e+07	2.42709e+08	8.82122e+06	906804	657256	2.0329e+07	1.28489e+07	1.40139e+07	5.90106e+07	2.36142e+07	7.05907e+06	2.26735e+07	108642	0	0	2.48269e+07	2.36988e+07	161455	26718.6	7.59094e+06	40601.5	97512.6	2.13116e+06	1.1891e+06	304543	1.5831e+07	1.12818e+07	69549	116667	66068	39359.5	158323	2938.34	41457.6	232962	195318	55689.2	2.70691e+06	1.48583e+06	4.6647e+06	1.83612e+08	1.76677e+08	2.98595e+08	4.96934e+08
EU	173	Public administration and defence services; compulsory social security services (75)	p75	11442.7	465767	128806	1.54067e+06	126544	11891.6	2193.71	322412	97826.2	122226	663655	187497	59946.3	184172	487.412	0	0	621035	243876	3831.58	559.287	198642	143.121	2761.67	12427.4	24331.4	1559.23	341161	91912.3	545.767	1157.54	132.012	181.782	739.15	18.5917	307.636	1257.35	1290.27	298.525	11809.1	7645.6	36460	869688	966576	1.76756e+06	4.00693e+06
EU	174	Education services (80)	p80	3283.79	47463.8	19902.8	771121	15686.4	390.865	3038.97	36945.2	42351.7	69620.9	183677	66957.4	24787.4	60920.4	155.004	0	0	374588	269620	514.527	57.9648	18022.5	383.141	64.2724	39219.3	1105.85	504.242	26826.9	47344.7	279.092	426.268	2040.75	42.0015	235.023	23.6147	159.902	669.015	205.474	256.856	1812.11	1812.48	14411.6	254844	410599	700944	710131
EU	175	Health and social work services (85)	p85	194.653	11212.5	6632.96	84615.4	4291.75	60.8493	216.005	16234.7	7374.16	12862.5	46664.4	320282	39016.2	136218	508.539	0	0	118016	27676.3	16.483	8.83311	2816.87	86.9272	21.3468	10551.7	165.01	138.543	11937.9	22198.8	146.39	140.07	901.91	80.246	91.6746	1.40734	17.0494	193.13	210.192	42.1492	572.476	374.727	9206.23	47832.7	153915	94856.8	99080.7
EU	176	Food waste for treatment: incineration	p90.1.a	1358.18	418016	115365	2.37322e+06	91981.5	13494.7	1869.31	182278	80716.7	97908.4	606415	166433	49006.8	112629	243.452	0	0	141737	173033	3209.84	162.96	47356.6	48.6816	1539.11	6006.22	21425.2	6528.69	29534.4	121855	591.086	29030.5	97.5244	1199.4	12192.7	28.8241	496.331	20793.9	7221.63	2568.42	5443.17	5713.61	17705.6	698161	799517	1.00063e+06	1.98699e+06
EU	177	Paper waste for treatment: incineration	p90.1.b	1371.03	448953	123543	2.44484e+06	96202.3	14663.8	1740.9	186718	84286.1	103953	638657	174244	51472.3	119332	239.495	0	0	139961	178344	3509.35	168.809	49395.1	46.1393	1652.52	6106.96	22836.9	5120.54	29789.6	114792	557.847	25399.7	98.9942	1129.31	10599.1	88.2891	498.821	18952.8	7284.34	2351.3	4992.34	5434.53	16187	712390	836674	1.04023e+06	2.09829e+06
EU	178	Plastic waste for treatment: incineration	p90.1.c	8403.15	1.18459e+06	347054	1.33185e+07	270380	29713	10933.4	784398	405113	429031	2.4098e+06	712841	177649	330055	1306.51	0	0	791176	1.62913e+06	5834.28	1059.99	299000	324.263	3294.6	22653.8	40575.1	25947	195675	1.08325e+06	5546.47	362680	673.295	3928.89	44004	712.828	2560.71	72990.5	21206.1	11272	27829.5	35852.1	118790	4.09381e+06	3.75952e+06	5.40414e+06	7.79834e+06
EU	179	Intert/metal waste for treatment: incineration	p90.1.d	30900.6	3.22355e+06	931218	2.59838e+07	1.00966e+06	86404.1	18076.2	1.76192e+06	1.09682e+06	1.05829e+06	6.2098e+06	2.02884e+06	577447	1.10108e+06	3367.02	0	0	2.24208e+06	3.37563e+06	18062.2	5294.98	1.68407e+06	1282.76	13765.7	89563.8	126683	108151	410294	1.80588e+06	8953.25	103040	3611.76	43586.8	305110	525.4	6111.99	714504	294377	50188.5	170884	179135	470655	1.02304e+07	9.43973e+06	1.43431e+07	2.20118e+07
EU	180	Textiles waste for treatment: incineration	p90.1.e	2535.33	539486	168380	7.47219e+06	122599	9528.4	7563.99	440521	218877	197341	1.19701e+06	360511	83806.9	141614	761.806	0	0	464407	1.00586e+06	1855.15	333.927	92565.3	175.018	1589.1	10336.6	15016.8	19851.5	124193	590062	3085.03	391529	328.5	3012.15	35940.6	78.8352	1139.96	42201.7	18109.5	3095.74	16203.2	14710.8	88393.2	2.31113e+06	1.8272e+06	2.73213e+06	3.94335e+06
EU	181	Wood waste for treatment: incineration	p90.1.f	384.914	258062	72045.1	1.06865e+06	59157.7	8640.03	623.201	107964	41789.5	55514.7	343692	89116	28799.1	72701.2	117.482	0	0	73842.9	98693.4	2158.65	184.443	60968.2	21.2715	1014.76	2826.36	13736.9	2955.76	15805.6	46959.2	223.206	7667.26	41.0874	866.317	7716	13.6441	200.549	15345.7	5857.29	1462.87	2938.53	3045.42	11492.1	335151	439074	519601	1.10626e+06
EU	182	Oil/hazardous waste for treatment: incineration	p90.1.g	3233.69	714280	202898	2.73218e+06	166695	19337.3	5700.57	277076	171220	185887	1.05383e+06	357683	105635	213790	718.114	0	0	339770	435320	4502.27	613.457	174084	193.08	2742.57	19349.3	32258.4	40760.9	80587.6	132657	453.648	18114.9	925.256	3963.29	28801.5	70.3197	882.246	105332	20630.9	20592.3	19987.8	38145.1	84336.6	1.41066e+06	1.41811e+06	2.42198e+06	3.90068e+06
EU	183	Food waste for treatment: biogasification and land application	p90.2.a	270.67	39028.6	11053.4	246383	8551.52	1339.72	260.469	20135.1	9587.18	12393	64678.9	16747.9	4702.72	11500	27.4803	0	0	10653.6	30858.5	357.394	17.0206	6126.08	8.29279	159.566	395.622	2245.53	414.875	4375.78	13873.5	73.0782	641.855	16.423	65.0728	475.741	5.39928	41.9672	1118.3	371.123	229.351	417.435	502.011	1453.69	73705.7	92092.4	123614	200872
EU	184	Paper waste for treatment: biogasification and land application	p90.2.b	10.811	2963.3	905.644	20753.1	663.017	102.015	10.5488	3536.69	1144.03	837.031	5613.48	1376.31	382.155	956.58	3.07386	0	0	1359.57	9420.88	28.6658	1.17689	432.979	0.876445	14.1348	34.578	195.151	57.1515	372.712	2274.97	11.7766	50.1277	1.0232	16.5572	56.5357	0.990592	4.53282	124.402	59.7946	30.2789	47.908	55.2064	151.347	10847.6	7701.5	13148.2	16944.5
EU	185	Sewage sludge for treatment: biogasification and land application	p90.2.c	648.676	508017	139405	1.58815e+06	113581	13516.6	1014.06	200978	74103.9	101779	604304	166915	59357.8	157150	268.828	0	0	209877	139493	3316.77	931.193	253590	78.4267	1603.01	15256.6	26234.2	6896.76	32803.6	76018.1	338.775	9813.43	135.353	943.257	6194.23	32.8066	368.539	18354.1	3871.53	3551.93	8386.17	7480.92	18994.1	587885	842863	1.04011e+06	1.78115e+06
EU	186	Food waste for treatment: composting and land application	p90.3.a	63107.6	9.46733e+06	2.91935e+06	7.38158e+07	2.55288e+06	255700	58626	5.52591e+06	2.64032e+06	3.09177e+06	1.63774e+07	4.83962e+06	1.55183e+06	4.56525e+06	31298.9	0	0	5.70281e+06	7.19457e+06	61514.9	39890.4	1.30595e+07	4702.9	35744.6	297480	425830	204634	995577	3.73943e+06	20650.4	110014	9399.47	30130.8	372183	4312.37	16539.9	566989	162621	88264.9	452841	348717	746280	2.00998e+07	2.42191e+07	3.37638e+07	5.11088e+07
EU	187	Paper and wood waste for treatment: composting and land application	p90.3.b	3.11674	4354.49	1232.02	11637.5	889.185	135.719	39.584	1761.23	532.647	817.832	5205.85	1245.79	419.012	1694.1	0.919255	0	0	1254.5	1717.02	25.3419	5.60622	1895.48	0.221286	10.9568	30.5306	159.97	7.24682	372.987	73.6862	1.28529	3.08698	0.436335	0.542837	24.1546	0.0539	1.85986	15.424	7.15375	1.68679	13.7145	15.7647	34.8702	3502.48	5646.14	7188.66	16707.9
EU	188	Food waste for treatment: waste water treatment	p90.4.a	19699.3	5.20457e+06	1.50384e+06	1.93261e+07	1.16405e+06	156199	19879.2	1.79283e+06	971466	1.33596e+06	6.87859e+06	1.95629e+06	635960	1.67509e+06	12403.8	0	0	1.78111e+06	2.07749e+06	45001.1	4850.4	1.56088e+06	1269.37	21141.2	140630	288752	72637	436119	560321	3130.19	95305.8	4092.28	5550.13	54240.8	252.781	6019.82	102669	26030.7	21971	71869.9	89230.3	250893	7.01879e+06	9.24012e+06	1.30966e+07	2.26535e+07
EU	189	Other waste for treatment: waste water treatment	p90.4.b	35237.1	7.30127e+06	2.09017e+06	3.3288e+07	1.62766e+06	190386	31078.4	2.65998e+06	1.52912e+06	1.97555e+06	1.01975e+07	2.9594e+06	934220	2.45868e+06	11044.3	0	0	2.96235e+06	3.75772e+06	47696.5	8491.94	2.64613e+06	2103.29	24219.1	242896	332692	136821	709639	1.30528e+06	7010.53	204484	7451.3	10014.5	87332.2	450.858	7368.64	178910	44036.6	37738.8	113496	153226	460329	1.14009e+07	1.3798e+07	2.09253e+07	3.37307e+07
EU	190	Food waste for treatment: landfill	p90.5.a	190185	2.16444e+07	6.10237e+06	7.36542e+07	4.99384e+06	170060	247085	9.1791e+06	3.50361e+06	5.47839e+06	2.47328e+07	1.06783e+07	3.76737e+06	1.40494e+07	17619.3	0	0	1.78648e+07	1.33102e+07	36853	98447.2	3.10664e+07	33626.5	26782.2	3.70166e+06	452132	638305	3.08191e+06	2.61753e+06	17365.9	194467	164782	34667	608564	2000.94	56685.9	1.34992e+06	199695	278655	1.14118e+06	1.13825e+06	3.75605e+06	2.74081e+07	4.55687e+07	8.69902e+07	7.84143e+07
EU	191	Paper for treatment: landfill	p90.5.b	40526.1	3.2744e+06	957485	1.45117e+07	860111	36573.4	48819.8	1.56609e+06	913573	1.16953e+06	4.7993e+06	3.35727e+06	756921	2.41601e+06	3462.67	0	0	3.09871e+06	3.31385e+06	7925.72	17702.6	5.57657e+06	4426.04	5886.39	356367	89536.2	133236	482247	604162	3445.46	37629.2	16992.8	8286.97	139333	415.375	11158.6	289174	51715.5	55891	259407	242275	532669	6.71049e+06	8.54584e+06	1.59618e+07	1.72891e+07
EU	192	Plastic waste for treatment: landfill	p90.5.c	2730.6	241550	70140.1	1.13303e+06	63881	3771.59	3522.86	121913	65963.9	73591.3	362738	133148	41409	128860	258.752	0	0	213220	295877	935.545	838.809	264401	212.6	710.277	20551.8	7386.36	7649.72	32873	54274.4	296.587	2087.83	1087.33	749.064	9943.2	31.1048	1067.69	20307	4511.95	4255.86	10321.9	10075.9	29156.3	474629	582017	1.07243e+06	1.2312e+06
EU	193	Inert/metal/hazardous waste for treatment: landfill	p90.5.d	3015.21	677932	194695	2.16249e+06	158479	15424.8	2220.61	231898	119082	177293	838756	257767	86326.6	321344	467.001	0	0	383733	251493	3803.83	1286.12	404808	151.686	1829.56	17463.6	27502.2	21357.9	45510.3	85422.6	467.479	13046.4	805.401	975.522	14556.2	37.4159	653.912	48768.1	7456.75	10483.8	14199.9	22917.5	38030.3	954822	1.14073e+06	1.68921e+06	2.77042e+06
EU	194	Textiles waste for treatment: landfill	p90.5.e	5338.49	497180	144955	1.7739e+06	129674	3577.87	12466.6	196237	100580	153075	600738	465708	106690	329145	432.171	0	0	371930	384514	695.836	1829.41	545095	441.429	574.322	40133	11224.9	15095	59260.8	71173	366.625	3935.28	2517.81	1396.05	22735.2	55.5993	2643.94	28937.6	5264.39	6136.65	27416.5	27842.6	60915.3	681922	990939	1.83482e+06	1.91875e+06
EU	195	Wood waste for treatment: landfill	p90.5.f	6320.19	523060	148648	2.52535e+06	124729	5566.22	6468.58	222911	135003	160677	743169	313773	91033.2	296062	496.733	0	0	446299	528774	1216.32	1677.49	518766	655.513	1034.45	64409.8	11926.2	13664.4	83767.8	101837	568.269	3480.22	3341.19	855.091	16776	54.7296	2408.77	26472.1	4893.76	5973.74	24517.6	23589.3	71597.3	982087	1.21119e+06	2.40249e+06	2.57586e+06
EU	196	Membership organisation services n.e.c. (91)	p91	199.838	261.261	120.982	3336.77	171.578	3.45101	28.7067	461.736	89.9767	99.8633	384.601	157.323	67.7088	111.284	31.8229	0	0	1108.67	2516.99	1.11576	0.115897	33.8976	0.34565	0.621351	8.2249	8.43846	5.42623	160.34	100.542	0.523036	1.5992	0.359883	0.986073	4.27293	0.144178	2.75195	5.01505	8.74988	2.21387	24.4909	18.9579	60.0732	810.662	811.631	2262.55	1632.97
EU	197	Recreational, cultural and sporting services (92)	p92	79725.9	315907	96848.8	1.51258e+06	127136	6131.09	439818	217603	119481	102039	606752	681638	189652	110273	801.139	0	0	284030	1.24929e+06	1143.49	51.1823	18409.5	385.556	809.279	58406.7	9039.24	2027.46	130228	34512.5	159.903	1235.47	397.778	217.809	1537.86	18.1592	335.627	1297.28	1914.36	342.616	10256.9	6838.57	330507	791939	1.0922e+06	6.07942e+06	7.41992e+06
EU	198	Other services (93)	p93	649.846	383268	125281	1.21417e+06	96800.4	13140.3	1529.73	191810	85046.1	109089	563247	180464	75064.8	250447	912.038	0	0	200809	275185	5233.25	466.056	159319	138.879	2596.9	9365.83	33999	2025.63	187058	27877.6	284.463	679.766	198.05	410.77	1526.82	13.6234	242.886	1713.84	1502.13	227.62	15020.3	6957.55	13259.1	909586	1.08391e+06	1.77675e+06	3.96258e+06
EU	199	Private households with employed persons (95)	p95	55.0011	7170.88	6928.63	59885.7	2388.8	107.974	10533.7	28437.3	2695.03	2120.96	12396.3	5130.25	1134.87	2502.58	69.7331	0	0	53342.6	7724.03	40.2228	4.06046	1103.86	8.24185	28.2848	252.048	415.262	205.449	221944	4093.62	28.1025	314.793	4.63511	8.56543	311.117	5.27301	50.8762	61.6136	164.056	64.1685	494.112	295.548	748.844	69631.4	42118	40619	81123
EU	200	Extra-territorial organizations and bodies	p99	0	0	0	0	0	0	0	0	0	0	0	0	0	0	0	0	0	0	0	0	0	0	0	0	0	0	0	0	0	0	0	0	0	0	0	0	0	0	0	0	0	0	0	0	0	0
NonEU	1	Paddy rice	p01.a	1.49468e+08	1.00481e+07	1.25267e+07	1.14256e+08	4.79345e+06	131489	1.13538e+06	4.95772e+09	3.58671e+07	1.01715e+07	7.07086e+07	6.3367e+07	2.80598e+07	7.76664e+07	2.29333e+07	0	0	5.89994e+07	3.31053e+07	55305.4	6760.36	1.99985e+06	11913.9	34142.5	392845	337679	424660	5.51147e+06	5.27266e+06	34643.5	149939	15095.4	31835.5	253477	9296.69	1.46142e+06	286526	192682	482359	932263	851563	1.91279e+06	2.62263e+08	9.9554e+07	2.89436e+08	4.01566e+08
NonEU	2	Wheat	p01.b	59101.2	7.97713e+08	6.41172e+06	4.80086e+07	1.33046e+06	27021.2	268908	1.74191e+08	6.65313e+06	4.17712e+06	1.57346e+07	1.24397e+07	6.509e+06	7.01286e+06	1.25979e+06	0	0	4.23851e+06	9.9986e+06	17670.8	2071.48	598118	3362.67	8042.65	123022	84224.8	134108	1.3907e+06	1.29357e+06	13000.7	34399.9	5014.19	27497.2	94828.8	2499.07	4.8762e+06	68993.2	74347.6	192246	312535	245117	668857	6.29307e+07	2.93048e+07	8.69583e+07	1.40745e+08
NonEU	3	Cereal grains nec	p01.c	43602.2	1.85159e+06	5.78463e+08	2.64544e+07	1.33327e+06	19190.7	422501	9.5256e+07	2.30824e+07	1.77124e+07	7.72989e+07	4.688e+07	2.48142e+07	5.69845e+07	2.0978e+06	0	0	3.28574e+06	1.04374e+07	15320.4	1334.82	442891	2736.67	6332.04	116604	67405	58993.4	1.38048e+06	848079	8092.68	21324.7	3980.65	29308.1	47085.4	2009.31	2.45639e+06	46618.8	40639.5	111386	262074	190157	445974	1.8393e+08	6.87524e+07	1.44167e+08	1.97609e+08
NonEU	4	Vegetables, fruit, nuts	p01.d	39706.7	1.57102e+06	829651	6.64445e+09	883937	20144	131742	1.48233e+07	5.0497e+06	6.05075e+06	2.16385e+07	7.65953e+06	8.70183e+06	5.11919e+06	623100	0	0	1.63904e+06	5.46594e+06	14182.5	1635.66	524151	2734.29	8060.22	112461	87172.9	48770.5	992197	1.12937e+06	6953.72	22523.3	3527.8	34786.5	85326.1	1594.47	1.70773e+06	40453.9	40184.5	99450.9	281323	314664	692736	5.51229e+07	4.7668e+07	1.22731e+08	2.28406e+08
NonEU	5	Oil seeds	p01.e	35428	1.39268e+06	701192	2.60295e+07	8.23943e+08	16594.2	137150	8.05691e+06	4.66303e+06	5.24405e+06	2.10985e+07	8.01999e+06	5.38568e+06	4.63866e+06	186311	0	0	1.31002e+06	7.4384e+06	10417.4	1429.7	445126	2422.22	5723.22	87109.2	63738.5	40924.5	744284	864910	5934.35	14489	2903.71	23827.5	44352.6	1378	477754	31426.2	41804.1	30384.7	210829	170876	547696	5.35295e+07	5.09143e+07	1.72419e+08	3.68751e+08
NonEU	6	Sugar cane, sugar beet	p01.f	18493.5	688507	665603	9.97582e+06	4.18607e+06	123522	69373.9	1.03207e+07	541541	467996	2.16416e+06	1.2183e+06	1.99295e+06	694254	309710	0	0	704221	2.81947e+06	7655.81	660.361	263568	1193.47	3420.37	40302.6	31129.7	34968.4	1.24913e+06	412995	2212.28	8675.18	1081.53	14961.6	17703.2	1950.16	732051	17321	16277.9	28166.1	118538	101994	216981	9.69094e+06	4.38064e+06	1.12517e+07	1.36944e+07
NonEU	7	Plant-based fibers	p01.g	13958.3	814579	309724	9.42e+06	404175	8986.77	9.89091e+07	3.0564e+06	270273	203388	1.07101e+06	530839	265479	353457	32566.1	0	0	597984	3.35573e+06	4732.93	620.735	207722	4366.59	4054.88	70336	32781.1	12658.5	181338	296862	1569.82	3875.98	1960.92	1549.37	8557.67	731.091	22588.2	70978	118426	5896.2	75365.5	46906.9	149648	3.07752e+06	2.20512e+06	5.1123e+06	6.80183e+06
NonEU	8	Crops nec	p01.h	36616.2	1.64486e+06	1.06654e+06	1.71905e+07	901678	20079.3	198098	1.05629e+10	6.43234e+07	9.90266e+06	9.21641e+07	9.61722e+07	3.36771e+07	1.42981e+08	1.01468e+06	0	0	1.15205e+08	8.48478e+06	12996.8	1588.61	612977	11048.1	5885.68	110556	70345.6	57839.3	1.25077e+06	1.26333e+06	11345.3	18274.6	3281.03	11806.9	53218.6	1579.22	659024	40451.4	39155.6	36095	190346	201652	461731	2.98429e+08	9.90952e+07	1.80631e+08	4.08986e+08
NonEU	9	Cattle	p01.i	564242	2.38042e+07	3.7909e+07	3.02719e+08	1.5833e+07	237407	8.52123e+06	9.65077e+08	2.34434e+07	1.68708e+07	7.33418e+07	8.68238e+07	2.99037e+08	2.72409e+07	1.71194e+07	0	0	4.01767e+07	8.45248e+07	133504	17217.9	6.15407e+06	23628.2	88938.5	935759	628321	498438	3.58465e+07	1.39433e+07	77446.3	248076	32672.2	121746	548253	37843.2	4.01454e+07	483583	391970	1.63313e+06	2.11884e+06	1.49194e+06	3.15467e+06	1.03301e+10	1.54164e+08	3.9773e+08	6.02391e+08
NonEU	10	Pigs	p01.j	85008.6	2.1682e+06	1.97978e+06	2.09901e+07	1.49776e+06	38435.6	144933	4.30251e+07	1.24296e+06	1.08869e+06	4.88169e+06	6.23016e+06	4.66982e+06	1.81468e+06	332228	0	0	2.12695e+06	1.55398e+07	24550.5	2464.19	617329	3584.97	8921.43	117605	100642	311288	1.70062e+06	1.50697e+06	9266.41	39309.6	3228.87	24713.3	104350	2125.72	1.55583e+06	55543.7	44092.5	87791.6	380398	279288	576891	1.97471e+07	3.134e+07	3.41205e+07	3.03343e+07
NonEU	11	Poultry	p01.k	35420.7	1.39517e+06	1.77601e+06	1.55609e+07	1.11198e+06	15890.5	487020	1.55809e+07	803475	744448	6.4073e+06	2.17432e+06	5.70298e+06	1.23104e+06	249424	0	0	1.94127e+06	4.86935e+06	15669.8	2142.43	574438	2189.71	6477.72	147888	60558.6	40984.6	2.6967e+06	1.83104e+06	5018.17	20150.8	2186.62	29655.5	44822.7	1621.58	2.16518e+06	34944.3	31401.9	83004.9	301269	176975	319696	1.30214e+07	6.70064e+06	1.21924e+08	2.3578e+07
NonEU	12	Meat animals nec	p01.l	47437.7	1.35676e+06	658736	1.54449e+07	700944	21639	124844	4.69935e+06	1.03208e+06	1.16246e+06	4.51206e+06	1.09801e+09	1.70423e+06	1.09469e+06	92480.2	0	0	1.82464e+06	3.2642e+06	8994.24	1119.32	320939	2024.27	5457.95	73097.4	59594.8	44379.4	1.04311e+06	864417	7070.29	17696.2	2356.79	25478.6	81668.4	3680.37	8.14642e+06	31649.9	59728	296461	260547	166168	325632	2.31953e+07	1.15102e+07	2.3033e+07	1.42601e+08
NonEU	13	Animal products nec	p01.m	6425.46	254733	122640	2.30757e+06	113629	2337.27	11971.5	555293	149160	228406	711917	387510	1.08829e+09	140736	1.64574e+06	0	0	137572	981464	1436.82	147.62	43788.5	214.02	665.686	9729.1	7390.6	7964.22	75500.4	113121	1164.09	2361.66	363.942	1445.12	7618.46	254.153	3037.26	5581.32	2822.75	2438.22	22887	21998.9	36109.5	1.517e+06	2.30882e+06	3.76575e+06	1.16042e+07
NonEU	14	Raw milk	p01.n	395044	9.54041e+06	5.93735e+06	8.80798e+07	4.9013e+06	168205	1.44409e+06	6.31581e+07	6.11591e+06	5.9723e+06	3.1351e+07	1.37235e+07	3.12288e+07	9.67407e+06	1.20514e+06	0	0	1.09724e+07	1.4913e+08	90879.1	11300.1	3.2315e+06	17786.1	49140	689286	502376	516319	8.74219e+06	9.73204e+06	52328.6	251282	21282.4	234705	550614	24552	5.84692e+07	302875	456896	2.175e+06	2.58149e+06	1.73974e+06	2.91148e+06	1.16321e+08	6.215e+07	1.52413e+08	1.4625e+08
NonEU	15	Wool, silk-worm cocoons	p01.o	33282.4	3.18219e+06	883751	9.3067e+06	752490	8043.61	22636.6	2.01687e+06	1.10329e+06	616287	3.28156e+06	1.7165e+06	1.68342e+06	1.92456e+06	4.57551e+08	0	0	1.76307e+06	1.27469e+06	6122.36	1996.97	362356	614.137	5431.54	90851.4	68573.1	11557.9	265751	434444	1093.36	3830.59	1504.49	10566.7	18238.7	836.359	310707	11733.4	16162.1	7488.38	74584.2	60546.7	136387	3.4337e+06	3.88656e+06	8.94149e+06	9.27694e+06
NonEU	16	Manure (conventional treatment)	p01.w.1	0	0	0	0	0	0	0	0	0	0	0	0	0	0	0	0	0	0	0	0	0	0	0	0	0	0	0	0	0	0	0	0	0	0	0	0	0	0	0	0	0	0	0	0	0	0
NonEU	17	Manure (biogas treatment)	p01.w.2	0	0	0	0	0	0	0	0	0	0	0	0	0	0	0	0	0	0	0	0	0	0	0	0	0	0	0	0	0	0	0	0	0	0	0	0	0	0	0	0	0	0	0	0	0	0
NonEU	18	Products of forestry, logging and related services (02)	p02	9104.54	761885	316971	9.42269e+06	547823	8004.01	22727.1	9.2688e+06	339928	240316	1.21706e+06	583026	245345	431303	16672.1	0	0	1.34025e+08	1.26528e+06	7943.11	623.764	237544	1357.25	6417.04	39772.8	49231.2	25074.9	322016	226101	1232.69	2392.79	773.073	2620.32	9440.14	461.747	9522.83	7335.2	8075.84	4585.92	45149.6	30033	332766	3.70971e+06	2.68956e+06	5.79796e+06	6.44813e+06
NonEU	19	Fish and other fishing products; services incidental of fishing (05)	p05	1990.69	82865.9	38396.5	738973	52865.4	765.001	11936.8	967309	278246	256125	2.37343e+06	943033	321106	1.28319e+06	2055.49	0	0	116923	4.39244e+08	282.838	98.6311	31472.6	86.7501	240.768	3955.12	2032.26	2229.02	21056.1	45868.6	277.545	1419.89	152.656	315.569	2701.59	75.9064	2926.15	1847.49	971.484	741.008	7174.29	14257.6	56115.2	8.10681e+06	8.09179e+06	2.41401e+07	1.43829e+07
NonEU	20	Anthracite	p10.a	38456.9	1.49701e+06	586942	1.60563e+07	684185	27845.3	66229.8	4.19956e+06	717553	888231	3.54756e+06	1.0824e+06	596452	876026	26129.5	0	0	1.47026e+06	4.47599e+06	1.52432e+08	8292.04	6.71051e+06	237848	33356.6	191293	127908	271581	809428	1.51371e+06	7450.59	5560.14	13662.3	6328.36	80579.9	1089.32	34216.2	31087.2	25064.5	48681.1	157615	123193	1.49916e+06	4.67198e+06	6.85611e+06	1.03082e+07	1.13255e+07
NonEU	21	Coking Coal	p10.b	131488	8.03353e+06	4.64711e+06	6.92755e+07	4.85006e+06	120232	371096	2.01605e+07	2.53191e+06	2.12375e+06	1.26922e+07	4.23704e+06	2.73168e+07	3.70221e+06	285169	0	0	5.30448e+06	9.58352e+06	432577	8.24928e+06	9.28887e+06	27031.6	64732.9	1.13659e+06	1.99943e+06	1.14361e+08	1.38879e+07	6.865e+06	36813.6	49247.2	12529.3	292595	265185	43446.8	254557	117184	165291	227280	807686	716884	4.85005e+06	2.43356e+07	1.97158e+07	3.34652e+07	5.67328e+07
NonEU	22	Other Bituminous Coal	p10.c	559361	4.89564e+07	1.93126e+07	7.02358e+08	2.18099e+07	635330	2.71186e+06	1.15828e+08	1.38537e+07	1.37483e+07	1.0369e+08	2.98864e+07	1.55506e+07	3.47016e+07	1.39503e+06	0	0	3.89488e+07	1.05439e+08	2.31905e+06	521686	6.3712e+09	5.40038e+06	459359	4.06914e+07	4.30575e+06	2.90621e+06	2.76354e+07	1.75903e+07	84469.1	150473	174072	310764	833472	28162.3	1.19623e+06	834441	1.14123e+06	472653	2.83957e+06	2.2354e+06	1.0341e+07	1.3033e+08	1.3052e+08	3.08342e+08	3.59218e+08
NonEU	23	Sub-Bituminous Coal	p10.d	255539	1.82663e+06	1.04781e+06	3.55893e+07	1.69578e+06	35612.1	734300	5.22265e+06	772517	936789	8.55667e+06	1.67467e+06	1.04977e+06	1.16226e+06	31834.9	0	0	2.31907e+06	6.99473e+06	317255	12146.6	6.06812e+06	2.59265e+08	298884	454131	1.81001e+06	255934	6.68235e+06	4.42839e+06	22952.2	10572.7	18373.7	544782	43601.1	103071	380916	19140.2	277566	23466.3	155364	189177	600192	8.09617e+06	8.89e+06	1.5706e+07	2.12932e+07
NonEU	24	Patent Fuel	p10.e	1060.33	116959	339426	610891	393409	955.944	3948.32	221970	38495.9	30372.1	143303	104748	94072.5	82044.9	2205.36	0	0	46336.9	197558	963.632	92.6437	28450.3	101.962	57426.7	6056.29	4382.02	1710.38	59113.3	35811.4	287.13	1210.47	92.7726	1033.16	3239.53	131.436	1465.67	1094.07	972.328	650.31	12684.5	6370.39	28025.1	262725	255333	586521	802326
NonEU	25	Lignite/Brown Coal	p10.f	63634.3	549837	222900	5.87906e+06	291279	6715.89	109098	1.22727e+06	238194	184053	1.10041e+06	345841	267609	321263	5031.66	0	0	447705	1.1167e+06	25988.3	3566.34	1.55825e+06	1716.62	19645.4	2.76454e+07	115858	46356.1	199041	579632	776.391	4358.34	1922.67	2.07581e+06	40864.1	285.93	16038.1	17458.2	7325.88	6366.56	28623.4	31424.6	841021	1.73099e+06	2.42219e+06	3.63645e+06	3.70018e+06
NonEU	26	BKB/Peat Briquettes	p10.g	1420.13	1.27671e+06	135911	1.54107e+06	93297.3	1316.54	14343.2	176468	56898.7	61108.3	1.57975e+06	140424	132140	322715	25627	0	0	85305.2	194675	12629.5	123.844	84711.6	852.885	263.341	8927.67	1.17112e+07	1600.51	59551	49990	388.136	478.268	141.757	1845.1	1875.18	34.5822	940.69	1425.81	3943.1	613.616	15579.6	34631.2	22202.4	209470	235366	698895	555228
NonEU	27	Peat	p10.h	1452.73	60518.3	41494.3	223496	33570.6	908.827	7779.02	207316	10675	13039	41876.9	23156.7	28031.6	25071.9	1853.82	0	0	49705.3	97550.7	690.771	155.02	53123.9	21.5896	318.494	1685.08	29445.7	214449	20879.8	7778.04	43.3921	283.071	23.7992	243.469	318.938	8.53112	307.087	418.643	217.125	216.355	1942.21	1425.76	20501.8	81963.9	81129.8	128615	252873
NonEU	28	Crude petroleum and services related to crude oil extraction, excluding surveying	p11.a	3.31808e+06	2.41919e+08	9.65548e+07	1.09772e+09	1.10203e+08	3.79963e+06	7.95115e+06	3.37919e+08	4.40893e+07	3.38642e+07	2.21507e+08	9.2199e+07	2.95149e+07	8.21219e+07	2.38637e+06	0	0	1.19634e+08	2.29122e+08	271370	101227	2.88322e+07	160296	660080	3.41578e+07	3.19574e+06	2.30163e+06	1.74597e+09	1.52607e+08	398753	2.19374e+06	148587	743505	2.95206e+06	439127	2.93137e+06	2.27339e+06	1.66619e+06	1.00644e+06	1.87925e+07	1.61216e+07	1.66139e+07	3.39783e+08	3.12695e+08	4.41364e+08	5.51058e+08
NonEU	29	Natural gas and services related to natural gas extraction, excluding surveying	p11.b	2.00612e+06	5.95784e+07	2.12017e+07	7.81222e+08	2.45418e+07	207149	700896	4.36241e+07	1.11795e+07	2.24087e+07	1.07362e+08	3.04008e+07	1.05556e+07	1.65899e+07	484838	0	0	7.42151e+07	1.32286e+08	209852	37692.6	7.22508e+06	50597.4	2.41492e+06	1.7234e+08	8.19436e+06	4.21488e+06	3.14889e+08	1.12487e+10	62905.4	9.20686e+06	208039	198575	281294	26841.3	288974	198963	7.50377e+06	352660	2.82734e+06	1.78108e+06	8.04872e+07	8.17115e+07	1.51272e+08	3.40828e+08	3.10496e+08
NonEU	30	Natural Gas Liquids	p11.b.1	161362	7.73633e+06	3.12942e+06	1.10754e+08	3.81683e+06	128772	678349	2.11134e+07	2.11609e+06	1.59104e+06	8.90662e+06	4.50633e+06	2.14911e+06	2.37443e+06	286413	0	0	5.40665e+06	1.20548e+07	23345.4	3662.26	1.03685e+06	11333.9	28169.9	292191	193576	116970	6.69401e+06	2.61361e+06	3.25866e+07	45367.3	10122.8	32676.4	152157	25320.1	607637	122512	137466	623660	1.27356e+06	718719	1.05583e+06	1.85626e+07	1.67156e+07	2.72373e+07	3.51134e+07
NonEU	31	Other Hydrocarbons	p11.c	22268.8	933070	406938	1.29033e+07	910443	13330.9	411433	4.02203e+06	262153	199718	1.04678e+06	654301	380003	296746	58853.5	0	0	1.14659e+06	3.12328e+06	6949.33	1129.84	293606	1240.66	2609.8	39536.5	28566.1	13232.8	503672	267840	8982.42	11605.7	1321.18	4218.95	26847.4	1462.37	32451.5	15521.3	13486.9	36865.1	247973	92695.7	573355	2.20331e+06	2.18245e+06	3.82593e+06	4.96356e+06
NonEU	32	Uranium and thorium ores (12)	p12	9460.84	640053	389632	8.35644e+06	659925	4921.2	542603	3.11849e+06	384602	446931	1.86102e+06	603507	272038	346391	22535.9	0	0	276640	1.18361e+06	2164.03	1647.46	294500	508.88	1384.4	15171	13731.9	12806.5	798519	156980	1055.76	6872.69	621.39	2121.34	12979.8	12234	39916	22770.9	9999.79	7880.56	32206.2	31887	78012.4	5.43154e+06	3.70352e+06	2.55645e+07	7.11527e+07
NonEU	33	Iron ores	p13.1	22748.3	1.74929e+06	763780	1.92559e+07	740182	30410	52610.9	4.24907e+06	576635	440729	2.30242e+06	910387	405008	929128	27831.2	0	0	1.78933e+06	2.44474e+06	21881	6500.87	1.61387e+06	3296.15	14158	209202	157979	83543.5	1.20407e+06	2.06268e+06	4915.19	6401.14	5103.09	8.39514e+06	229388	11767.4	406984	70988.1	39797.8	145851	149084	123615	620034	4.72822e+06	4.05199e+06	9.63552e+06	9.63485e+06
NonEU	34	Copper ores and concentrates	p13.20.11	37694.4	2.32209e+06	894852	2.27452e+07	1.15164e+06	28335.2	242988	6.64315e+06	611107	495625	2.5765e+06	1.50276e+06	957830	1.03663e+06	173094	0	0	1.88797e+06	3.46965e+06	28562.6	4818.56	1.39371e+06	4516.11	15322.3	153903	176815	73621.1	1.33151e+06	1.21898e+06	10632.5	12559.8	6208.55	52213.5	1.69462e+07	25037.9	4.87776e+06	151475	232962	1.89813e+06	240245	167848	642466	4.92445e+06	4.80729e+06	1.04294e+07	1.21809e+07
NonEU	35	Nickel ores and concentrates	p13.20.12	10531.6	554366	217895	9.01883e+06	803325	9282.75	50673.4	3.40869e+06	222847	173155	863659	578106	980749	274761	41054.5	0	0	1.18461e+06	3.47105e+06	7544.15	922.905	256168	1085.85	4734.62	45544.3	51359.9	32356.2	332268	484798	1831.52	4568.01	1593.81	19144.4	97894.8	9.77893e+06	446308	15654.6	34911.7	79792.9	60831.2	82964.2	143431	1.72771e+06	1.82688e+06	4.16617e+06	5.01089e+06
NonEU	36	Aluminium ores and concentrates	p13.20.13	10655.4	598890	227209	6.52836e+06	262551	10557.5	36681.9	1.18066e+06	191334	154397	758637	372190	160331	266414	11349.4	0	0	513348	918868	7082.79	934.162	270839	3157.96	4624.62	65151.6	56757.4	26842.8	331724	348336	2362.31	2071.71	2595.9	3112.53	18104.5	2345.61	7.51116e+07	9793.12	17318.1	8467.14	387446	115617	123231	1.7074e+06	1.42155e+06	3.20957e+06	3.74966e+06
NonEU	37	Precious metal ores and concentrates	p13.20.14	10228.3	502876	202220	6.44114e+06	240067	6804.11	72947	1.21297e+06	189696	130398	659105	435205	544894	185102	119266	0	0	388357	1.45116e+06	6450.66	953.625	195829	1072.68	4504.44	28276.1	45827.1	21527.7	281257	270161	1681.53	3196.67	929.12	3521.36	379643	647.715	19231.5	38169.5	192667	21983.6	48595.5	38045.3	104641	1.506e+06	1.19041e+06	3.06187e+06	1.24237e+07
NonEU	38	Lead, zinc and tin ores and concentrates	p13.20.15	10850	1.00198e+06	426057	8.72128e+06	516599	9775.69	65826.9	2.74841e+06	207980	152444	813917	428391	239096	365223	55338.1	0	0	556168	855992	8386.79	1315.52	307916	1062.63	3844.72	45560.4	45091.4	46147.9	303513	357751	2565.69	2926.9	2997.37	23884	91989.1	505059	510891	54050.8	6.89856e+06	158492	54167.3	47798.9	174906	1.78326e+06	1.48154e+06	3.15841e+06	3.3037e+06
NonEU	39	Other non-ferrous metal ores and concentrates	p13.20.16	25168.1	1.66708e+06	625767	2.44215e+07	862627	23629.7	311867	4.2546e+06	531292	406533	2.17906e+06	1.69561e+06	735838	669077	489381	0	0	1.56839e+06	3.55759e+06	19493.5	2871.61	723154	2449.36	12368.5	117986	137734	68178	859849	1.37153e+06	6766.58	8171.4	4168.13	36694.4	105934	53802.9	733873	55247.7	81377.3	1.2068e+07	151326	151985	467836	4.42446e+06	4.00934e+06	8.05148e+06	1.20802e+07
NonEU	40	Stone	p14.1	37323.1	1.10628e+06	790731	1.87885e+07	698740	13351.5	155178	1.06582e+07	460748	277190	1.53373e+06	878339	439512	505801	99596.1	0	0	792327	2.11741e+06	17535.9	1659.06	941547	30465.8	8411.96	46877.2	52607	100443	364090	2.3858e+06	20404.5	4838.82	1450.9	7312.24	19788.8	762.405	16218.5	19201.3	16863.3	9965.03	3.81064e+07	274110	363754	4.38031e+06	2.54754e+06	5.13414e+06	6.73617e+06
NonEU	41	Sand and clay	p14.2	76846	3.37266e+06	1.43807e+06	4.90388e+07	1.78332e+06	42265.6	477122	1.05025e+07	1.6218e+06	990691	5.07093e+06	3.21475e+06	1.83066e+06	1.29987e+06	349689	0	0	3.47494e+06	6.54801e+06	20633.9	3057.06	966125	11038.5	15645.9	190913	140655	94061.4	1.52035e+06	1.73062e+06	12424.2	22314.3	5920.77	26920.4	378419	5004.97	3.36846e+06	82060.4	64116.7	249465	3.84232e+06	3.12909e+07	1.21257e+07	1.27123e+07	1.05737e+07	2.08787e+07	2.66168e+07
NonEU	42	Chemical and fertilizer minerals, salt and other mining and quarrying products n.e.c.	p14.3	16665.9	1.44609e+06	649449	1.72516e+07	1.92618e+06	12435.8	114468	1.24713e+07	593546	361784	1.98661e+06	823548	368216	500488	109271	0	0	661709	1.7739e+06	2773.2	741.364	252733	644.837	5902.39	18705.9	19567.2	14696.2	274981	166466	1102.71	2556.61	608.813	2025.16	16322.3	1003.76	40944	7432.19	7355.72	5259.76	305283	72930.1	1.35978e+08	1.05218e+07	3.35004e+06	1.18326e+07	2.94327e+07
NonEU	43	Products of meat cattle	p15.a	4746.68	195585	82771.8	2.18559e+06	157659	1573.32	43897.6	684840	95777.3	89558	437267	193202	167568	105065	132203	0	0	163947	612707	730.105	113.7	34756	176.928	504.946	5759.84	5189.49	2867.12	57006.2	104157	838.658	2915.01	196.178	880.245	4629.55	379.489	3581.78	3607	2538.21	1592.71	16118.6	15339.6	32226.5	2.6038e+08	1.36915e+06	2.94399e+06	6.4552e+06
NonEU	44	Products of meat pigs	p15.b	2675.04	94628.1	71945.5	809667	81919	835.454	4874.48	423176	55798.1	61065.3	258345	106277	96711.7	80285.4	3415.61	0	0	63982.2	379080	690.866	75.6294	24820.4	107.719	281.834	4649.73	3572.5	1371.15	57608.8	61288.4	295.309	1744.72	115.882	2701.69	3303.15	145.361	4902.92	2240.96	1601.93	2152.1	14412.7	14595.2	17282.6	760328	2.53586e+07	1.40226e+06	1.66519e+06
NonEU	45	Products of meat poultry	p15.c	2458.31	88871.4	81772.8	1.11486e+06	93341.1	875.141	25244.4	371053	45777.1	43572.1	202580	100423	144979	56202.9	16356.9	0	0	98028.9	323927	761.949	77.8017	26182.2	114.847	332.785	4968.9	3773.52	1410.41	121316	68424.2	414.377	1670.73	123.295	4016.36	3820.57	83.1904	3204.06	2728.86	1708.2	1748.46	15303	16721.1	17544.2	1.08866e+06	603668	1.46756e+08	1.58969e+06
NonEU	46	Meat products nec	p15.d	6817.9	351872	148556	3.54695e+06	218008	2167.23	52547.3	998238	142758	139552	644112	283909	189254	178016	12330.4	0	0	217637	1.13789e+06	909.888	146.182	43959.9	411.584	519.584	7106.51	8336.45	5601.93	81968	133529	1087.31	2548.04	229.331	1584.23	5201.74	526.039	7871.92	4663.42	3247.06	2579.52	31882.5	19774.3	37204.6	2.44777e+06	1.73496e+06	3.66634e+06	8.24945e+08
NonEU	47	products of Vegetable oils and fats	p15.e	8843.81	305792	319841	5.24969e+06	391156	2707.15	65745.5	5.12358e+06	861021	823034	3.68418e+06	1.9387e+06	1.58175e+06	829368	111394	0	0	331983	1.96311e+06	1369.56	207.842	68740.4	309.928	929.236	10573.1	7542.98	9737.23	207251	188227	1030.51	4519.64	367.467	1364.41	8396.93	393.304	37218	6461.11	4385.86	4418.02	28314.3	38297.5	90519.6	2.47538e+07	8.37443e+06	3.1282e+07	6.02164e+07
NonEU	48	Dairy products	p15.f	5440.89	126367	63912.6	1.34948e+06	76441.1	1562.01	18971.4	687440	92193.1	112657	733022	245388	150672	189909	42683.6	0	0	116012	2.68261e+06	582.659	100.715	29856.1	160.883	438.883	5066.22	4030.83	3589.36	51901.1	103234	571.179	3202.99	173.778	672.44	4288.56	137.053	4749.67	3416.48	2408.79	2105.36	15044.3	14605.2	39897.1	2.66501e+06	996234	2.53684e+06	2.67404e+06
NonEU	49	Processed rice	p15.g	8209.5	304759	127206	5.10259e+06	348977	3207.82	148813	1.7129e+06	405410	338452	1.6431e+06	727874	571953	305861	24638.2	0	0	432067	1.66862e+06	1526.09	227.912	70756.4	338.592	1229.23	13834.8	11252.3	5521.7	135755	177820	2288.53	4808.56	452.714	1059.61	9656.68	452.774	15512.6	6495.77	4613.22	4901.68	34653.2	55544.4	126184	3.76147e+06	3.55227e+06	1.28806e+07	2.75352e+07
NonEU	50	Sugar	p15.h	2580.74	80084.4	40307.9	2.66456e+06	58803.5	950.365	22072	589519	343118	305787	1.6265e+06	871256	355066	510943	37428.1	0	0	101761	997386	459.129	75.6947	23970.9	107.7	313.189	4489.53	3147.23	1863.87	51673.2	71824.3	349.967	1904.96	149.27	646.752	3272.22	84.856	17124	2444.13	1656.31	2514.98	10920.8	11284.5	22756	2.68237e+06	2.54109e+06	6.02874e+06	8.94809e+06
NonEU	51	Food products nec	p15.i	13653.1	364567	367309	5.42782e+06	239811	5116.66	60313.4	6.39058e+06	4.8358e+06	5.83087e+06	2.10022e+07	8.70446e+06	4.54311e+06	6.00833e+06	259789	0	0	590197	5.12348e+06	3072.3	389.371	129973	729.48	1783.93	32987	15687.3	13613.6	325800	444444	1950.94	9432.58	1108.62	5168.07	15440.7	276.844	152496	12604.9	8782.03	12815.4	69366.7	90549.8	239547	4.60775e+07	3.61927e+07	1.05575e+08	9.1242e+07
NonEU	52	Beverages	p15.j	9032.14	217066	124388	2.23096e+06	105090	3129.83	29336.1	1.12708e+06	1.65313e+06	1.22169e+06	5.46245e+06	1.81383e+06	652629	1.01201e+06	7451.24	0	0	271358	2.27197e+06	1676.33	258.477	80911.8	500.803	1302.63	16930.8	10892.1	10235.1	120273	264586	1211.09	7811.24	759.4	2386.13	22565.6	189.84	53363.7	10234.3	6187.02	8587.06	46108.2	49059.9	114591	6.24478e+06	4.92657e+06	8.22464e+06	1.05531e+07
NonEU	53	Fish products	p15.k	8023.96	175102	88500.8	2.65836e+06	93248.3	2422.98	19343.3	1.10391e+06	1.80135e+06	2.23699e+06	1.0395e+07	2.45411e+06	892864	1.03965e+06	15651.5	0	0	171242	3.42724e+06	1087.51	137.411	42549.3	246.798	759.278	7658.66	7014.39	4277.72	91577.8	156247	814.668	4047.98	301.426	825.732	5622.72	174.592	49274.5	4637.01	3305.75	4254.66	20362	21222.6	61850.1	2.29727e+07	2.16449e+07	1.9121e+08	5.84888e+07
NonEU	54	Tobacco products (16)	p16	6467.69	423019	159572	4.69257e+06	271836	5008.36	67657.5	1.10965e+06	97758.3	75666.2	405779	205071	173735	136974	10754.2	0	0	332971	864457	3866.25	457.875	134820	392.874	2319.38	22825.6	26717.7	10268	163564	145916	1304.83	1847.69	593.871	823.956	9074.25	622.302	9814.23	4654.16	3741.62	4822.42	24958.2	18607.6	51208.8	987310	836929	1.55228e+06	2.02111e+06
NonEU	55	Textiles (17)	p17	40624.4	2.36712e+06	790310	4.91675e+07	909975	34789.4	168014	8.91622e+06	853021	632159	3.56736e+06	1.91726e+06	635389	1.24272e+06	56088.9	0	0	2.18087e+06	2.72882e+07	8131.14	2520.51	749046	4273.65	5124.61	324990	67738.9	29854.5	395206	376947	2887.98	11468.7	9162.66	6619.38	19015	904.42	110445	18071.7	17699.2	14627.9	106087	77864.3	292968	8.80599e+06	6.95186e+06	1.28793e+07	1.79684e+07
NonEU	56	Wearing apparel; furs (18)	p18	56220.5	320112	149237	6.11594e+06	174703	5781.2	57287.9	3.56695e+06	114912	90837.2	509603	289968	124459	183106	49358.3	0	0	407060	702507	2808.62	563.912	180335	504.916	1483.66	22524.8	17024.4	15089.7	127903	200094	1792.55	9987.73	520.59	1728.59	11363.8	182.808	22808.2	9670.82	5215.02	7038.25	46599.1	30398.8	77358.9	1.15692e+06	1.18764e+06	1.91159e+06	2.84133e+06
NonEU	57	Leather and leather products (19)	p19	4736.91	327471	112832	3.21491e+06	141444	3005.92	17408.9	743122	85899.9	53797.1	346497	194718	93117.8	105564	6591	0	0	146054	583513	1001.48	243.157	75336.1	179.952	546.534	8885.7	6301.49	3793.59	75208.4	51481.3	737.261	1098.79	194.823	438.33	2829.83	458.251	4564.52	1936.23	1879.25	1613.95	11126.8	8403.45	21146.8	896355	627012	1.17198e+06	1.93802e+06
NonEU	58	Wood and products of wood and cork (except furniture); articles of straw and plaiting materials (20)	p20	49358.4	2.96864e+06	928197	4.2679e+07	962224	40648.5	109280	7.91456e+06	1.45268e+06	946045	4.8667e+06	2.22427e+06	699126	1.24587e+06	82883.6	0	0	4.53882e+06	6.62179e+06	43545.6	2320.64	986302	4522.06	46000.1	169872	284273	84810.4	714631	582590	3452.45	10410.3	3245.1	6509.35	23610.3	1465.5	28685.7	27941.4	29818	15279.1	170033	110085	552287	9.09436e+06	7.37178e+06	1.56957e+07	2.01961e+07
NonEU	59	Wood material for treatment, Re-processing of secondary wood material into new wood material	p20.w	0	0	0	0	0	0	0	0	0	0	0	0	0	0	0	0	0	0	0	0	0	0	0	0	0	0	0	0	0	0	0	0	0	0	0	0	0	0	0	0	0	0	0	0	0	0
NonEU	60	Pulp	p21.1	17020	1.01542e+06	587391	2.07073e+07	504008	11725.6	68946.2	3.64977e+06	687275	507441	2.36376e+06	972093	449105	676488	38951	0	0	884563	1.88798e+06	11283.9	1200.69	455214	26062.6	14459.5	165318	286231	220003	975035	1.42331e+06	4539.73	7274.06	2107.13	46045.6	72500.5	1146.46	82233.2	325004	513286	22207.5	407936	111392	352018	1.07521e+07	7.38813e+06	2.31927e+07	2.00928e+07
NonEU	61	Secondary paper for treatment, Re-processing of secondary paper into new pulp	p21.w.1	0	0	0	0	0	0	0	0	0	0	0	0	0	0	0	0	0	0	0	0	0	0	0	0	0	0	0	0	0	0	0	0	0	0	0	0	0	0	0	0	0	0	0	0	0	0
NonEU	62	Paper and paper products	p21.2	28124.5	1.70961e+06	909859	3.45772e+07	935418	21341.1	87245.9	5.29815e+06	1.21681e+06	932722	4.24169e+06	1.76299e+06	852652	1.19371e+06	79210.9	0	0	1.42187e+06	3.50264e+06	11468.6	1636.32	538908	6809.3	9119.72	113137	97636.1	50902	619630	583655	4339.62	13104.4	2870.05	6244.43	23898.8	1335.33	34249.6	28398.8	38535.1	14882.9	243454	135762	719156	1.74455e+07	1.15905e+07	3.79765e+07	3.7166e+07
NonEU	63	Printed matter and recorded media (22)	p22	6831.59	393194	175871	3.12153e+06	216506	5702.39	15088.1	654551	119701	99708.1	528641	248491	120759	172854	8242.02	0	0	344347	510712	2050.41	566.462	170221	1509.5	1462.38	21794.6	19946	12421.5	116937	211307	857.809	3619.54	644.381	2200.77	5276.43	171.208	3063.6	10495.8	13397.4	2930.86	97087.3	40437.4	103186	1.65339e+06	1.12352e+06	2.08859e+06	2.59063e+06
NonEU	64	Coke Oven Coke	p23.1.a	47233.6	3.12332e+06	1.53137e+06	3.09242e+07	1.61589e+06	55004.8	159543	7.32446e+06	1.0544e+06	734985	4.01631e+06	1.66937e+06	940508	1.4349e+06	187973	0	0	2.65698e+06	5.29852e+06	43137.5	7374.25	2.01399e+06	5401.7	27884.3	336638	350267	174113	4.05341e+06	6.66479e+06	266282	14530.2	6710.79	69657.3	150673	4361.41	150091	45551.3	46203.8	62270	323124	274433	1.67579e+06	7.14402e+06	6.92787e+06	1.44082e+07	1.69794e+07
NonEU	65	Gas Coke	p23.1.b	15957.7	590988	295981	8.46463e+06	231497	12258	41371	2.24155e+06	239100	184565	895977	421940	181409	226299	6601.16	0	0	583071	1.34104e+06	7530.05	852.021	224431	1003.66	5501.02	47080.9	48578.7	14301.5	1.18611e+06	406839	1252.36	3418.36	2274.21	2203.07	28666.9	2489.87	759854	9817.32	19495.4	279028	70683.4	39372.9	91846.5	2.19119e+06	1.43501e+06	3.02134e+06	3.23016e+06
NonEU	66	Coal Tar	p23.1.c	3787.26	268631	116998	2.94988e+06	135496	3129.19	10830.4	4.08866e+06	83678.2	52448.6	296841	150745	102784	135274	8339.27	0	0	222782	548140	2796.12	397.794	102332	336.215	1399.57	18320.1	19239	6706.44	84106.6	103000	511.83	1002.63	365.396	943.75	6287.82	306.198	6612.89	2565.4	2569.78	2821.58	20145.5	25858.8	30027.6	811063	588869	1.143e+06	1.5213e+06
NonEU	67	Motor Gasoline	p23.20.a	190664	7.69443e+06	3.19741e+06	6.52975e+07	3.99523e+06	212927	498769	2.98576e+07	2.10084e+06	1.70988e+06	9.93172e+06	4.58688e+06	1.9927e+06	2.30941e+06	400337	0	0	5.67265e+06	1.4189e+07	14829.9	2508.63	601984	5448.57	10982.3	144704	128875	100548	1.3051e+06	4.8924e+06	13483.1	29335.8	4379.57	29803.6	80345.1	12109.1	82624.1	60397.4	40972.9	43409	992233	440977	682509	2.35983e+07	2.08415e+07	2.92167e+07	3.46003e+07
NonEU	68	Aviation Gasoline	p23.20.b	1460.15	11918.5	9446.44	126065	16974.6	331.199	21710.1	175559	5572.17	4464.51	22555.7	12409.7	20494.6	7454.91	707.827	0	0	23342.5	129853	87.6871	10.045	3100.08	19.2494	87.4397	638.936	497.648	303.559	14435.7	6204.58	22.366	89.0259	16.9394	98.5769	227.665	6.78907	185.457	218.987	177.04	114.521	1414.27	1167.6	2103.77	68865.8	39172.5	116687	1.15811e+06
NonEU	69	Gasoline Type Jet Fuel	p23.20.c	418.042	13107.9	9495.08	170875	21318.3	151.061	1138.52	187108	5332.28	4017.28	19782.3	15485.1	5867.26	8163.17	1446.87	0	0	27084.7	111002	105.672	7.96601	2433.73	15.1442	37.3831	719.692	484.297	297.233	22876.6	3860.16	32.8976	115.751	20.3914	106.826	283.403	8.82223	140.496	264.723	143.251	127.373	1484.64	961.991	1517.9	79981.3	37693.7	102734	1.14084e+06
NonEU	70	Kerosene Type Jet Fuel	p23.20.d	26753.6	1.08346e+06	503799	1.03984e+07	476003	15696.3	173582	7.71928e+06	363775	305429	1.54329e+06	680491	343207	493145	160668	0	0	1.11916e+06	2.03748e+06	4671.36	1089.74	310409	2945.69	7991.7	68636	39750.6	37859.1	660125	1.43219e+06	3025.05	10410.6	1553.65	19187.3	12844.3	356.778	48174	17430.7	9390.39	11339.9	293095	285195	460681	3.64303e+06	3.61167e+06	5.22113e+06	6.69968e+06
NonEU	71	Kerosene	p23.20.e	312627	569511	353856	3.0023e+07	271199	7450.88	340118	1.37469e+07	262345	163135	1.05198e+06	449727	191777	386845	20659.4	0	0	616767	6.44184e+06	2272.48	229.187	55701	439.315	980.545	14134.6	19153.3	10221.5	220951	260714	1304.91	10228.7	584.894	3118.75	11898.1	738.72	8640.89	5508.44	3954.33	9144.1	46221.9	47611.7	121711	1.65849e+06	1.47424e+06	2.33083e+06	3.44508e+06
NonEU	72	Gas/Diesel Oil	p23.20.f	759787	6.63374e+07	2.11727e+07	2.72321e+08	2.53344e+07	1.26052e+06	2.5215e+06	8.6207e+07	1.32894e+07	9.34382e+06	5.31644e+07	2.4914e+07	7.99117e+06	1.2709e+07	533365	0	0	3.31925e+07	4.31588e+07	44664.2	9669.56	1.64346e+06	16502.1	41072.7	444732	313949	228647	4.11634e+06	1.03344e+07	41284.1	69456.1	13400.7	91072.7	208259	8466.33	596626	180986	102004	203494	3.03417e+06	2.30667e+06	3.61033e+06	8.69517e+07	7.4217e+07	1.04284e+08	1.26626e+08
NonEU	73	Heavy Fuel Oil	p23.20.g	229876	1.39089e+07	6.98061e+06	1.56297e+08	7.40862e+06	236494	678859	4.37624e+07	5.32269e+06	4.65105e+06	2.47109e+07	1.04293e+07	3.16771e+06	6.25826e+06	246006	0	0	1.04914e+07	4.54781e+07	59037.8	4822.51	1.25978e+06	30897.4	44166.2	570812	399537	372268	4.57255e+06	5.87637e+06	214558	97425.5	87103.3	215326	1.21971e+06	18729.4	477981	546938	509222	198194	2.93207e+06	8.161e+06	3.13964e+06	5.55349e+07	5.30245e+07	7.59284e+07	1.37994e+08
NonEU	74	Refinery Gas	p23.20.h	4997.3	221239	121804	1.84897e+06	142352	3994.38	52902.6	699584	66702.4	52516.6	283519	128491	76549.2	89530.8	6899.99	0	0	166490	412237	729.731	124.223	32923.7	204.492	429.368	10093.5	4978.56	3442.02	118652	71274.1	787.716	1663.71	281.083	1267.19	7303.01	1076.47	5084.34	3090.45	1717.29	1702.81	24046.4	19834.6	25216.9	633198	547160	1.00716e+06	8.1585e+06
NonEU	75	Liquefied Petroleum Gases (LPG)	p23.20.i	38652.1	5.17991e+06	2.64286e+06	2.97764e+07	3.70838e+06	64086.8	698228	7.44715e+06	966338	845406	6.54359e+06	2.41929e+06	1.00988e+06	4.33671e+06	214851	0	0	2.66319e+06	4.9376e+06	13642.8	8730.09	2.72268e+06	2881.62	13778.9	239160	96329	59228.9	1.77161e+06	6.41406e+06	7394.4	37801.2	4356.87	67721.9	583050	18133.8	236165	914962	79160.7	226403	212691	427239	689434	9.00787e+06	1.15192e+07	2.11273e+07	1.74688e+07
NonEU	76	Refinery Feedstocks	p23.20.j	24348.1	972848	476059	8.44324e+06	678525	17493.7	67278.4	2.61334e+06	262297	200665	1.109e+06	484397	183265	285156	27753	0	0	589021	1.52764e+06	3455.83	387.885	101594	888.425	1893.61	35523.9	19764.5	13254.3	730346	495498	7159.58	6316.93	1164.23	8320.81	19449.9	6302.31	46245.3	9102.76	7332.16	8958.09	106812	75151.3	115207	2.35444e+06	2.02377e+06	3.24216e+06	4.29914e+06
NonEU	77	Ethane	p23.20.k	2007.45	158132	105543	1.90805e+06	92402.7	1275.78	5413.09	491234	36407.4	26754.8	138812	65150.2	36945.5	47926.6	3565.58	0	0	85217.6	259880	821.589	160.597	51672.6	162.242	422.88	4874.52	4808.27	2292.61	85444	45810.7	301.129	497.141	200.959	649.281	2193.38	236.926	4427.51	1949.27	2663.13	1378.05	9566.59	18796.1	28631.1	394854	320495	641658	1.42196e+06
NonEU	78	Naphtha	p23.20.l	117013	2.10578e+06	1.17551e+06	2.28189e+07	1.81449e+06	19496.8	93780	5.98394e+06	627539	460483	2.23625e+06	997595	417958	688557	45692.4	0	0	1.46629e+06	2.98411e+06	10220.3	1352.81	352728	2417.35	7513.51	61903.4	69167.4	36364.3	538878	505784	7911.72	17196.2	3787.28	7317.43	38506.1	175549	168406	36842.7	44642	18825.2	3.54963e+06	109586	331248	5.86071e+06	5.1573e+06	1.04839e+07	1.08414e+07
NonEU	79	White Spirit & SBP	p23.20.m	3937.79	169534	95828.3	1.97248e+06	101107	2315.22	10917.7	549572	47833.4	35863.3	198106	93911.5	111779	59001.7	6214.47	0	0	167204	501002	2028.1	138.293	48661	269.897	2638.72	10434.9	19494.5	16020.3	59571.2	87051.8	766.83	2424.72	258.388	1145.14	3360.51	252.783	5704.38	2100.14	1894.97	1611.72	21951.7	27968.8	52542.5	394850	365357	651202	807470
NonEU	80	Lubricants	p23.20.n	25703.6	477391	311063	3.86322e+06	324823	13766.8	36301	1.4359e+06	161290	145974	820642	351508	209260	226984	18683.5	0	0	407711	1.02352e+06	5270.59	482.268	162037	1712.31	2325.34	20577.5	19873.8	28224.9	187937	410780	2666.52	23539.7	660.427	3975.01	13604.1	1076.98	77521.1	8605.97	6038	7084.04	101840	82986.7	128773	1.77496e+06	2.01705e+06	2.55803e+06	3.16234e+06
NonEU	81	Bitumen	p23.20.o	8134.16	521093	288678	4.37708e+06	262127	10350.9	34374.3	1.21336e+06	132857	105371	578236	294044	154758	210850	13499.7	0	0	450237	736823	4125.65	243.367	170807	5676.42	1447.16	525448	126734	71788.5	117480	264399	1913.96	126519	5101.75	3305.87	7524.86	2266.5	10457.8	4634.87	5990.54	3550.83	67805.6	49547.9	84494.6	1.39709e+06	944437	1.64815e+06	2.14233e+06
NonEU	82	Paraffin Waxes	p23.20.p	2093.7	199518	106625	1.09485e+06	90761.5	3509.83	7673.74	410476	40132.4	37530.9	198159	71499.9	62676.5	89544.9	2755.83	0	0	140182	268074	2296.76	194.684	59440.4	332.039	330.539	15507.5	27188.8	17338.2	41762	35726.8	341.892	5421.2	151.202	1562.47	2949.91	181.288	2368.54	1159.7	918.656	850.843	16538.9	21511	48941.7	311064	335486	494143	747550
NonEU	83	Petroleum Coke	p23.20.q	3883.18	239319	117024	1.97252e+06	124653	5110.08	11452	602886	64073.8	51200.4	296539	124448	114956	74415.3	5220.8	0	0	195137	627980	1990.23	115.127	48457.3	794.686	683.865	68475.2	7557.97	4630.4	58372	226788	1007.54	2684.78	289.276	2067.35	3232.46	313.654	3475.62	1914.22	2222.08	1274.86	25210.8	19196	49996.1	625019	485732	903828	1.03014e+06
NonEU	84	Non-specified Petroleum Products	p23.20.r	10725.5	1.70404e+06	959171	8.03224e+06	882607	21765.6	132720	2.09836e+06	243344	209832	1.36598e+06	455943	273227	609887	15322	0	0	639991	1.1884e+06	12377	2132.75	628156	674.69	3356.23	29260.2	54229.9	24545.6	212673	237350	2407.62	7133.2	755.126	2858.02	10540.1	1454.15	54427.5	8068.96	7767.57	8979.08	1.77399e+06	175947	92572	1.93102e+06	2.0186e+06	3.1763e+06	9.32234e+06
NonEU	85	Nuclear fuel	p23.3	1017.46	84344.9	83624.1	908472	72329	1314.98	7739.08	673956	42592.7	35447.3	179238	75190.9	30593.6	44149	1885.57	0	0	65610.6	112683	734.288	94.1733	24272.4	272.354	540.046	4309.2	5678.15	6461.62	32164.3	49340.8	530.022	468.866	212.009	484.193	2266.84	95.0828	2209.2	4239.5	8826.19	1122.71	5951.57	5827.66	20925.2	529173	437745	1.35575e+06	1.3394e+06
NonEU	86	Plastics, basic	p24.a	58533.9	3.55386e+06	1.37926e+06	5.46615e+07	1.38967e+06	56231.6	198118	8.74454e+06	1.76849e+06	1.37795e+06	6.68113e+06	2.61814e+06	948094	1.77445e+06	53397	0	0	3.08954e+06	6.36959e+06	30115	7229.25	2.00338e+06	13474.8	41530	283738	337634	167830	1.54466e+06	8.2294e+06	41257.8	17204.1	17121.1	33640.4	140876	3134.36	272633	228032	488157	85461.3	245716	213685	767915	1.7275e+07	2.28196e+07	4.50777e+07	3.59672e+07
NonEU	87	Secondary plastic for treatment, Re-processing of secondary plastic into new plastic	p24.a.w	0	0	0	0	0	0	0	0	0	0	0	0	0	0	0	0	0	0	0	0	0	0	0	0	0	0	0	0	0	0	0	0	0	0	0	0	0	0	0	0	0	0	0	0	0	0
NonEU	88	N-fertiliser	p24.b	398456	1.15324e+07	1.27478e+07	6.76619e+07	4.53868e+06	54550.9	215450	2.28654e+07	1.04566e+06	462635	2.29798e+06	3.39705e+06	465663	1.168e+06	45958.2	0	0	4.63653e+06	514977	1706.97	207.898	54308	764.763	706.919	75545.8	298415	241711	234916	463035	435.15	1101.92	478.864	1538.24	3269.59	170.137	53070.6	2305.9	3200.14	5387.48	16555.3	12980.5	33361.9	1.53581e+07	2.27317e+06	4.90539e+06	8.15384e+06
NonEU	89	P- and other fertiliser	p24.c	405422	9.32622e+07	7.06796e+07	8.77572e+08	6.10566e+07	463156	3.72571e+06	2.29587e+08	9.03723e+06	5.6569e+06	2.35991e+07	1.72543e+07	6.10032e+06	1.82927e+07	474616	0	0	5.29281e+06	2.72871e+07	12603.4	1708.03	506311	3797.69	7005.89	273278	149743	126720	1.09861e+06	1.71566e+06	4608.04	8942.33	72067.7	9628.11	152003	1950.97	407608	182768	51339.4	68051	125825	131292	281926	5.11661e+07	2.64162e+07	5.15428e+07	9.13998e+07
NonEU	90	Chemicals nec	p24.d	457829	4.1785e+07	1.79221e+07	5.17753e+08	3.12531e+07	247340	1.0271e+06	1.05579e+08	7.66812e+06	6.04005e+06	3.24187e+07	1.60094e+07	7.70647e+06	1.25935e+07	924866	0	0	1.61517e+07	6.826e+07	136613	19776.8	5.81863e+06	29528.8	75446.1	941323	901194	498461	8.46701e+06	9.70175e+06	71316	133871	27981.6	76686.7	474939	98992.5	1.44659e+06	295064	433388	275746	1.54602e+06	1.21834e+06	4.2535e+06	1.07644e+08	7.53534e+07	1.38508e+08	1.69624e+08
NonEU	91	Charcoal	p24.e	60046.2	136159	102064	1.51274e+06	163562	1942.93	27691.8	2.08964e+06	60033.1	39414	207016	105522	54694.9	86377.5	1656.33	0	0	112195	542605	26564.5	5636.99	2.51651e+06	5407.59	63880.3	331425	56606.5	60482.2	4.93937e+07	1.09057e+06	171.651	17472.1	1325.01	12551.4	13109.7	3324.7	33031.5	79439	10890.4	34888.1	16086.4	17689	58417.4	364176	337410	1.05176e+06	860417
NonEU	92	Additives/Blending Components	p24.f	2313.47	327941	154611	2.21726e+06	383675	13079.6	21701.2	1.20159e+06	73134.9	45385	265817	133929	127042	70889.5	2490.95	0	0	189421	719797	3900.95	305.509	121881	832.853	3080.26	5548.61	7165.47	7312.66	1.57199e+06	931936	5357.77	1846.94	152.179	1073.31	2030.5	118.419	1698.66	2249.36	3382.25	695.528	32329.2	19990.3	28418.6	613653	351433	699442	934981
NonEU	93	Biogasoline	p24.g	2271.73	25342.5	14829.1	627161	26956.8	455.895	2122.53	213087	11063.5	11250.7	45756.7	23155.9	53536.2	13151.1	1484.79	0	0	40633.6	124066	145.066	20.6892	6006.51	41.601	93.5633	1156.5	984.438	706.9	10733.8	19432.4	50.1411	186.49	57.1003	76.9323	584.071	20.5897	538.728	1169.01	337.216	753.219	4416.58	2384.51	4117.72	131172	126192	218715	225785
NonEU	94	Biodiesels	p24.h	41345.9	313068	139206	1.952e+06	96091.4	12535.8	4531.27	1.06927e+06	45694.7	29431.4	226407	48614	24004.2	35362.1	752.72	0	0	127436	452214	879.561	63.714	9778.22	44.4846	557.346	1902.68	5775.53	883.605	808464	169221	900.854	1714.82	46.559	1161.93	662.182	14.3233	563.981	1432.14	717.3	551.619	5201.21	6490.56	21467.8	421509	405780	594418	679145
NonEU	95	Other Liquid Biofuels	p24.i	643.641	13196.9	10159.7	182808	17870.8	174.095	4274.21	104074	5352.11	4624.77	20307.2	11284.3	21072.1	6176.99	430.985	0	0	23045.7	102090	68.2826	8.25361	2382.72	15.2389	29.3912	581.938	414.921	275.961	11836.8	4368.91	23.7569	100.008	18.6397	61.6179	292.443	5.08243	365.504	356.361	141.416	178.162	1484.67	1051.42	1651.91	56694.8	49236.9	137708	292311
NonEU	96	Rubber and plastic products (25)	p25	44125.9	2.76557e+06	1.0256e+06	4.19986e+07	1.07122e+06	43385.7	119242	7.63886e+06	1.47796e+06	1.15245e+06	5.37963e+06	2.08681e+06	764971	1.42872e+06	58038.9	0	0	1.96981e+06	4.59763e+06	21808.8	4516.77	1.37191e+06	5064.37	15345.9	184944	231279	108592	840795	1.23204e+06	5793.18	11767.3	4826.51	6365.67	40847.1	1494.31	60734.5	27545.3	27534	49579.8	188749	142033	514824	1.39095e+07	1.82312e+07	4.02479e+07	3.12937e+07
NonEU	97	Glass and glass products	p26.a	45615	2.965e+06	1.08638e+06	4.93688e+07	1.13959e+06	31768.6	116966	7.79154e+06	1.61518e+06	1.24734e+06	5.95982e+06	2.49707e+06	977291	1.83719e+06	50932.5	0	0	1.65365e+06	3.67065e+06	25975.5	5246.25	1.47227e+06	3510.17	19712.9	170144	170374	86728.4	852786	1.13275e+06	3644.41	9095.7	3453.13	13745	29001.8	1518.67	42036.1	26038.2	33478.9	74493.4	243741	181983	1.36718e+06	1.20902e+07	9.80391e+06	1.89098e+07	2.70189e+07
NonEU	98	Secondary glass for treatment, Re-processing of secondary glass into new glass	p26.a.w	0	0	0	0	0	0	0	0	0	0	0	0	0	0	0	0	0	0	0	0	0	0	0	0	0	0	0	0	0	0	0	0	0	0	0	0	0	0	0	0	0	0	0	0	0	0
NonEU	99	Ceramic goods	p26.b	24542.5	578544	294936	5.20344e+06	313149	10796.1	58945.3	2.11869e+06	216240	157466	822266	369445	228107	263551	82519.2	0	0	536923	947039	7354.68	708.583	224507	1291.77	4146.87	58142.4	49137.2	13041	307923	398166	1441.73	4787.27	2789.21	6225.64	11553.9	350.476	9482.8	11574.9	12821.8	4958.9	86202.2	83942.6	226700	1.66509e+06	1.5054e+06	3.0855e+06	9.08199e+06
NonEU	100	Bricks, tiles and construction products, in baked clay	p26.c	6574.2	221338	146188	2.11638e+06	161945	2620.49	14936.2	728538	58963.2	44803.3	231611	115776	120637	85494.8	7990.3	0	0	202092	509453	1959.37	154.132	49532.9	1157.95	798.347	103867	11159.1	4045.92	85998.1	106177	501.173	1017.69	358.687	2927.45	49951.7	213.978	6218.62	5180.73	4469.07	2260.22	32836.3	29673.2	55649	520432	464497	888330	1.05681e+06
NonEU	101	Cement, lime and plaster	p26.d	398103	1.12136e+07	7.38315e+06	1.37136e+08	7.99622e+06	141587	923502	4.0221e+07	3.51587e+06	2.47733e+06	1.30242e+07	5.86471e+06	4.59415e+06	4.04843e+06	395224	0	0	7.87247e+06	1.62492e+07	111030	8260.2	2.65269e+06	41200.2	39391.1	1.54272e+06	592531	231272	6.34043e+06	5.72984e+06	28359.7	60192.6	15906.1	222517	754966	13401.4	214967	252272	271886	110651	2.2676e+06	2.53255e+06	3.94761e+06	3.05512e+07	2.38302e+07	4.45979e+07	5.34823e+07
NonEU	102	Ash for treatment, Re-processing of ash into clinker	p26.d.w	0	0	0	0	0	0	0	0	0	0	0	0	0	0	0	0	0	0	0	0	0	0	0	0	0	0	0	0	0	0	0	0	0	0	0	0	0	0	0	0	0	0	0	0	0	0
NonEU	103	Other non-metallic mineral products	p26.e	92480	5.29051e+06	2.18236e+06	5.10043e+07	2.31359e+06	91730.4	383652	9.4131e+06	2.26572e+06	1.52352e+06	7.83922e+06	3.25724e+06	1.48819e+06	2.58945e+06	311645	0	0	3.58187e+06	6.11613e+06	51965.7	6005.22	1.92634e+06	25770	36959.4	357465	373601	120402	2.30968e+06	5.7498e+06	15877.2	15965.4	8639.22	15430.7	94209.5	2978.75	97724.5	107014	67038.7	62360.1	681688	565491	1.23434e+06	1.35079e+07	1.16872e+07	2.24381e+07	3.09765e+07
NonEU	104	Basic iron and steel and of ferro-alloys and first products thereof	p27.a	537121	3.67619e+07	1.32798e+07	3.57312e+08	1.37304e+07	653442	1.16529e+06	7.04743e+07	1.05882e+07	8.21001e+06	4.37667e+07	1.79802e+07	7.75614e+06	1.68609e+07	557061	0	0	3.61957e+07	5.4089e+07	607888	95216.1	2.61168e+07	74331.9	351957	4.44006e+06	3.99615e+06	1.67461e+06	2.57956e+07	4.20104e+07	88697.7	139900	118321	186255	1.58799e+06	20257.3	2.18426e+06	637276	471655	1.00185e+06	2.77437e+06	2.07088e+06	1.0419e+07	7.83816e+07	7.4238e+07	1.60903e+08	1.77057e+08
NonEU	105	Secondary steel for treatment, Re-processing of secondary steel into new steel	p27.a.w	0	0	0	0	0	0	0	0	0	0	0	0	0	0	0	0	0	0	0	0	0	0	0	0	0	0	0	0	0	0	0	0	0	0	0	0	0	0	0	0	0	0	0	0	0	0
NonEU	106	Precious metals	p27.41	10414.5	677669	274604	6.80953e+06	330302	9298.89	54253.3	1.88939e+06	301614	194446	976928	425302	233714	291185	31833.9	0	0	532718	1.16885e+06	12818.2	1699.56	360668	1704.44	8762.36	55976.3	86295.9	22663	434531	341627	1944.26	3946.33	1229.85	2639.35	237604	824.21	51376.2	11558	14652.6	15418.9	58933.1	34794	112440	2.31759e+06	1.61709e+06	5.28564e+06	2.49022e+07
NonEU	107	Secondary preciuos metals for treatment, Re-processing of secondary preciuos metals into new preciuos metals	p27.41.w	0	0	0	0	0	0	0	0	0	0	0	0	0	0	0	0	0	0	0	0	0	0	0	0	0	0	0	0	0	0	0	0	0	0	0	0	0	0	0	0	0	0	0	0	0	0
NonEU	108	Aluminium and aluminium products	p27.42	103705	7.32716e+06	2.6521e+06	5.90974e+07	2.63168e+06	122184	236844	9.88491e+06	2.24724e+06	1.78437e+06	1.01555e+07	4.11335e+06	1.61685e+06	4.03305e+06	57755.2	0	0	6.43514e+06	1.3602e+07	90871.3	19940.8	5.74671e+06	9239.25	59432.6	672545	650950	190568	5.74994e+06	2.97921e+07	28957.4	26920.1	20790.8	67961.8	260148	3753.28	215175	157021	80622.9	133048	425237	401284	2.13368e+06	1.80805e+07	1.781e+07	3.81891e+07	4.86898e+07
NonEU	109	Secondary aluminium for treatment, Re-processing of secondary aluminium into new aluminium	p27.42.w	0	0	0	0	0	0	0	0	0	0	0	0	0	0	0	0	0	0	0	0	0	0	0	0	0	0	0	0	0	0	0	0	0	0	0	0	0	0	0	0	0	0	0	0	0	0
NonEU	110	Lead, zinc and tin and products thereof	p27.43	4583.83	317350	123120	2.50656e+06	121558	4015.68	25332.1	1.26667e+06	209639	105433	494970	199944	100082	129082	4881.44	0	0	201863	362183	4461.47	559.485	125406	443.996	2800.62	17533.2	28013.8	12781.7	138081	179693	876.64	982.708	1132.61	749.433	23408.3	233.492	54537.3	17238.3	5821.23	10797.3	22154.7	16442.2	57209.3	1.0941e+06	609530	1.81815e+06	1.34435e+06
NonEU	111	Secondary lead for treatment, Re-processing of secondary lead into new lead	p27.43.w	0	0	0	0	0	0	0	0	0	0	0	0	0	0	0	0	0	0	0	0	0	0	0	0	0	0	0	0	0	0	0	0	0	0	0	0	0	0	0	0	0	0	0	0	0	0
NonEU	112	Copper products	p27.44	22342.1	1.34483e+06	459848	1.26515e+07	504599	23812.2	37916.8	2.55755e+06	425167	319817	1.77753e+06	722200	279126	639192	21033.4	0	0	1.18773e+06	1.86843e+06	40336.9	5002.02	1.19504e+06	2272.37	21720.9	165244	269385	43713.9	837146	683722	3468.48	4431.93	3639.22	5072.77	77318.4	896.598	51793.7	40837.8	19546.6	37187	96061.1	69701.1	261353	3.02241e+06	2.75814e+06	5.75551e+06	7.52074e+06
NonEU	113	Secondary copper for treatment, Re-processing of secondary copper into new copper	p27.44.w	0	0	0	0	0	0	0	0	0	0	0	0	0	0	0	0	0	0	0	0	0	0	0	0	0	0	0	0	0	0	0	0	0	0	0	0	0	0	0	0	0	0	0	0	0	0
NonEU	114	Other non-ferrous metal products	p27.45	19214.2	1.55577e+06	551569	1.56845e+07	572174	28423.1	44563.2	2.63708e+06	555642	400303	2.28486e+06	887281	346347	700518	25707.2	0	0	1.41746e+06	2.49857e+06	28460.4	3688.89	1.07179e+06	2517.33	18282.6	154741	204850	55176.6	980242	2.25004e+06	5891.93	5184.35	4637.04	6479.52	60847.1	759.743	27657.9	22371	18556.8	30052.1	106232	88442.7	357597	4.19579e+06	3.534e+06	7.44817e+06	1.7107e+07
NonEU	115	Secondary other non-ferrous metals for treatment, Re-processing of secondary other non-ferrous metals into new other non-ferrous metals	p27.45.w	0	0	0	0	0	0	0	0	0	0	0	0	0	0	0	0	0	0	0	0	0	0	0	0	0	0	0	0	0	0	0	0	0	0	0	0	0	0	0	0	0	0	0	0	0	0
NonEU	116	Foundry work services	p27.5	29550.3	2.41178e+06	981023	2.35779e+07	993515	46467.7	75734.9	5.25924e+06	639063	510554	2.70939e+06	1.13742e+06	568843	1.03996e+06	41676.8	0	0	2.37958e+06	3.74216e+06	59176.1	6312.75	1.93108e+06	4892.73	31164.2	305760	385425	88332.2	1.54194e+06	4.47417e+06	6379.29	9026.98	5043.54	14180.1	49295.3	1197.4	41885.5	31619.8	36489.8	30347.9	219058	149732	677005	5.31207e+06	4.65266e+06	9.48929e+06	1.06244e+07
NonEU	117	Fabricated metal products, except machinery and equipment (28)	p28	78968.7	5.75275e+06	2.17034e+06	6.89991e+07	2.11602e+06	110138	173331	1.24135e+07	2.38704e+06	1.63422e+06	8.31179e+06	3.4289e+06	1.30019e+06	2.65843e+06	96398.5	0	0	4.88697e+06	8.59866e+06	69887	10380.7	3.26146e+06	10899.8	61891.3	633297	598438	231796	3.84776e+06	3.29267e+06	12210.6	21481.3	26620.4	19209.4	100662	3450.25	124296	59306.4	62067.1	95623.2	428737	309658	1.0898e+06	1.69926e+07	1.37178e+07	3.60434e+07	3.45761e+07
NonEU	118	Machinery and equipment n.e.c. (29)	p29	26263.9	4.80492e+06	1.55976e+06	3.62929e+07	1.67809e+06	115518	59281.1	6.08014e+06	785168	621582	3.19232e+06	1.33405e+06	468123	991083	26459.1	0	0	4.39539e+06	2.91094e+06	23685.1	5293.99	1.27414e+06	5282.8	30748.6	252398	252843	131561	1.7131e+06	1.63857e+06	11353.4	7471.4	5605.25	10929.8	49987.4	1460.93	72545.3	21819.2	23913.7	68492.8	317749	254607	693485	5.7248e+06	4.74322e+06	1.20727e+07	1.29066e+07
NonEU	119	Office machinery and computers (30)	p30	3396.7	233253	78755	8.14605e+06	67413.2	4098.06	5469.13	385325	101904	153856	549775	130525	47999.9	93197.1	5590.06	0	0	224142	611700	907.209	326.116	90446.1	228.756	1112.91	12765.2	7054.46	4057.28	68641.6	421975	2089.53	1435.25	157.763	429.979	3381.45	217.127	2008.66	1989.14	1889.75	1047.34	11928.6	9129.86	53649.5	1.09716e+06	1.52179e+06	971571	1.44138e+06
NonEU	120	Electrical machinery and apparatus n.e.c. (31)	p31	22739.2	2.20643e+06	750954	1.63209e+07	686818	34066.7	35825.5	2.05742e+06	800739	623426	3.35071e+06	1.47427e+06	465349	1.34369e+06	20509.1	0	0	2.7e+06	5.18562e+06	138074	8006	2.84963e+06	5416.78	66511.7	659168	859457	34963.1	1.63067e+06	1.96592e+07	5267.37	7246.42	4764.45	11517	28110.7	464.147	24130.8	22962.6	19055.3	24559.3	132409	136633	772347	4.73934e+06	4.57352e+06	8.84578e+06	9.72746e+06
NonEU	121	Radio, television and communication equipment and apparatus (32)	p32	8313.61	678898	282034	6.48464e+06	244624	9153.45	18209.9	962045	168692	161350	884500	326716	138484	388733	13177.2	0	0	693514	1.63599e+06	7405.99	1519.34	501426	1988.84	6343.5	125436	66753.3	24264.8	541196	1.22115e+07	3043.52	4109.77	2190.22	2285.3	8942.56	518.786	5750.23	9763.49	17515.2	4244.87	78952.1	50347	213046	1.72717e+06	1.71552e+06	2.72264e+06	3.95846e+06
NonEU	122	Medical, precision and optical instruments, watches and clocks (33)	p33	5605.78	552924	260558	3.11851e+06	159160	6196.01	13163.1	598582	131077	104973	590079	231028	109878	228947	8069.42	0	0	415072	2.33203e+06	10382.2	1184.26	444473	5514.63	17838.1	32359.3	199341	119039	256750	4.8484e+06	1633.2	2504.26	635.727	3024.86	8082.83	271.328	4847.53	47807.5	232406	2978.91	240146	105602	278535	1.1519e+06	1.08532e+06	2.08959e+06	3.41251e+06
NonEU	123	Motor vehicles, trailers and semi-trailers (34)	p34	8476.26	662991	448375	6.58611e+06	267510	9507.39	28234.9	1.18642e+06	231220	156493	777474	393459	201528	245007	19397	0	0	977827	614819	2197.63	538.97	159691	718.71	4042.06	41763	23658.8	12047.9	237408	353732	2615.3	3604.02	1353.51	2453.65	5429.24	163.097	10690.6	5456.63	4102.18	5241.37	57510.2	35016.3	166659	1.43133e+06	1.20666e+06	2.48203e+06	2.78734e+06
NonEU	124	Other transport equipment (35)	p35	18141.8	541058	219537	4.8396e+06	252640	11427.1	43880.9	1.21598e+06	205191	194512	1.0108e+06	424977	180250	406181	21988	0	0	1.46446e+06	9.91264e+06	5991.65	1989.41	626569	1949.57	4909.1	133980	38884.3	26911.2	380837	445907	1710.96	5585.84	4106.28	2862.68	24166.8	442.128	10670.9	20024.1	9794.13	11087.8	98832.9	109329	220367	1.9403e+06	2.31534e+06	3.58994e+06	3.91498e+06
NonEU	125	Furniture; other manufactured goods n.e.c. (36)	p36	21262	926926	357964	1.03572e+07	615825	12323.5	199710	2.6696e+06	253475	217608	1.136e+06	603432	541732	370234	119936	0	0	1.16136e+06	3.49575e+06	6360.48	997.908	297972	1636.43	4560.74	49586.3	56186.5	28241.3	386714	2.53826e+06	3831.36	10128.4	1399.93	2793.83	20971	715.054	13367.7	16564.3	14956.8	10386.1	125544	78716.9	196289	2.73468e+06	2.56843e+06	4.51726e+06	5.58596e+06
NonEU	126	Secondary raw materials	p37	39618.1	2.10369e+06	791591	2.38878e+07	948163	35987.8	220907	5.15627e+06	896923	661657	3.26702e+06	1.48662e+06	846765	959984	279077	0	0	2.3028e+06	4.71207e+06	24811.9	2881.04	802682	4341.12	18718.1	253901	186443	65388.3	1.46069e+06	1.2518e+06	4742.03	12409.2	7532.12	5855.16	81750.4	2581.55	1.1343e+06	35467.7	35212.2	205676	384612	146327	565757	7.4596e+06	6.09158e+06	1.62881e+07	1.76764e+07
NonEU	127	Bottles for treatment, Recycling of bottles by direct reuse	p37.w.1	0	0	0	0	0	0	0	0	0	0	0	0	0	0	0	0	0	0	0	0	0	0	0	0	0	0	0	0	0	0	0	0	0	0	0	0	0	0	0	0	0	0	0	0	0	0
NonEU	128	Electricity by coal	p40.11.a	2.06901e+06	9.34053e+07	5.26234e+07	2.64126e+09	6.52221e+07	1.29288e+06	1.22549e+07	8.93786e+08	3.57883e+07	2.53564e+07	1.27706e+08	6.02072e+07	3.81554e+07	4.9136e+07	4.12609e+06	0	0	7.86132e+07	1.457e+08	1.85169e+06	111405	4.08233e+07	296038	782511	6.10553e+06	7.79641e+06	2.74415e+06	4.88766e+07	3.88211e+07	275822	431389	183167	794063	2.1632e+06	100123	6.61433e+06	1.6746e+06	2.86331e+06	2.51806e+06	1.09639e+07	8.99845e+06	1.91899e+07	3.12276e+08	2.59971e+08	6.45326e+08	7.69592e+08
NonEU	129	Electricity by gas	p40.11.b	462448	2.05195e+07	9.8343e+06	6.7334e+08	1.80365e+07	319811	3.52358e+06	1.0096e+08	7.29624e+06	5.81088e+06	2.94093e+07	1.77545e+07	1.11245e+07	8.908e+06	1.20716e+06	0	0	1.84747e+07	4.44416e+07	240980	19399.4	6.20697e+06	60719.2	106236	1.46963e+06	1.27687e+06	578373	3.0854e+07	1.30903e+07	60009.8	208565	38099.9	144069	583526	45691.5	4.86604e+06	522162	451908	2.19818e+06	4.21997e+06	1.8474e+06	5.57013e+06	7.15952e+07	6.02378e+07	1.23878e+08	1.60808e+08
NonEU	130	Electricity by nuclear	p40.11.c	1934.8	175828	149260	1.46508e+06	131836	1432.23	16002	350893	34187.2	29015.4	144615	70461.3	71630	56044.9	35292.9	0	0	110598	225262	3792.91	660.34	163716	317.207	389.938	13303.1	8746.21	2798.98	114232	114016	582.482	1248.89	182.999	3586.48	3451.6	83.6525	5032.02	2641.01	1288.43	2458.31	18478.7	19543.3	64793.9	316320	277623	569333	660957
NonEU	131	Electricity by hydro	p40.11.d	4832.54	364883	294765	3.87721e+06	285188	3338.49	31952.5	469268	76796.1	64799.1	325497	154233	106072	118545	10296	0	0	204018	544398	8533.77	705.441	201185	740.031	949.111	23486.4	20667.4	6406.47	303059	228266	631.781	2280.75	409.755	8853.21	6596.14	512.124	63736.7	5129.03	3259.66	33650.4	54917.6	44854.5	116826	659207	658968	1.23773e+06	1.49032e+06
NonEU	132	Electricity by wind	p40.11.e	2331.2	119901	121786	1.3724e+06	116443	1340.71	44147.5	773454	39219	30747.4	150863	79228	85817.7	65464.2	59125.4	0	0	150168	356919	1454.18	113.257	38736.4	184.736	480.136	9485.89	8004.9	2329.99	78168.5	159014	258.513	813.325	218.287	3423.53	3972.86	102.544	2326	2296.34	1261.93	1861.8	19376	30031.6	101685	331179	310006	733049	1.28737e+06
NonEU	133	Electricity by petroleum and other oil derivatives	p40.11.f	291639	1.06185e+07	4.51278e+06	5.47711e+08	9.52979e+06	180196	2.69283e+06	5.71591e+07	4.14414e+06	3.45651e+06	1.73847e+07	1.06399e+07	7.77714e+06	4.99748e+06	1.08063e+06	0	0	1.13494e+07	2.36834e+07	76429.4	9094.34	2.42692e+06	16577.3	52561.8	860832	537913	528679	2.25744e+07	6.11942e+06	35721.9	155428	22147.1	49449.2	358172	23096.8	521400	314143	186339	1.16738e+06	2.63367e+06	939608	2.78184e+06	3.92139e+07	3.637e+07	7.18079e+07	9.4153e+07
NonEU	134	Electricity by biomass and waste	p40.11.g	6219.53	611975	411645	3.20141e+06	246350	6347.05	30425.7	1.31187e+06	118312	94296.4	492327	233731	188917	163762	6180.04	0	0	415068	585275	2643.68	2883.38	659082	1205.84	1707.74	44315.3	21123.4	12731.9	355042	493854	1218.74	2961.49	553.459	8817.46	12060.6	369.007	8908.4	12029	9932.96	6864.73	53541.2	46527	259136	1.25267e+06	971516	1.86184e+06	2.4229e+06
NonEU	135	Electricity by solar photovoltaic	p40.11.h	458.254	31831.7	21296.2	299176	24958.2	202.409	1891.59	203777	7126.51	5094.89	25128	16946.5	15266.7	8607.27	1926.32	0	0	22441.1	72243.9	189.164	11.5791	3711.58	48.9143	75.1393	768.973	788.966	431.061	11142.1	8813.11	39.16	122.165	25.7636	312.605	371.7	20.5705	775.166	372.031	393.052	283.375	1983.76	1335.82	7442.97	78287.5	49152.1	113604	150702
NonEU	136	Electricity by solar thermal	p40.11.i	242.922	8745.22	3279.5	106085	7025.25	176.618	2937.72	30464.5	3632.22	3208.03	14905.8	7329.84	8620.17	4266.97	1471.89	0	0	14922.2	45569.2	93.0493	15.8146	3525.15	16.7286	66.2846	1077.68	703.949	527.009	7306.35	6910.79	18.8929	677.043	45.0128	40.6444	432.719	5.67699	589.743	983.117	347.827	402.375	1338.45	816.148	2226.63	25908	31077.6	56901.8	59828.8
NonEU	137	Electricity by tide, wave, ocean	p40.11.j	1995.37	316297	137342	1.17356e+06	124814	1004.14	18317.7	138639	28475.8	22145.5	106706	115925	14893.8	24535.1	1493.49	0	0	50067.6	215397	462.384	60.1851	14823.2	207.04	377.471	2974.53	4808.89	3038.4	35796.8	53702	190.034	890.818	108.183	1526.87	1486.92	40.0222	1541.6	2802.55	2312.34	1121.84	9492.59	4979.02	169614	302931	224328	455399	557938
NonEU	138	Electricity by Geothermal	p40.11.k	1341.23	94849.6	62382.3	984781	50532.2	1407.15	4445.84	233709	28647.9	22242.9	113262	51326.1	78001.7	41761.7	3901.94	0	0	81247.3	177850	1533.85	231.904	65132.2	163.366	644.707	7841.01	7922.05	2821.93	51407.5	63712.3	224.582	445.305	180.041	1106.11	2202.99	76.634	2408.33	1155.9	953.5	1302.24	9832.72	12286.6	32433.7	237572	223972	497630	578215
NonEU	139	Electricity nec	p40.11.l	19808.2	1.28706e+06	754566	1.38945e+07	2.68683e+06	19343.7	168058	1.13601e+07	448158	333620	1.69038e+06	808092	760309	597102	48886.6	0	0	1.26502e+06	2.69536e+06	11292.8	3669	941461	1755.09	8020.67	100708	82777.6	33347.9	1.35741e+06	1.12507e+06	2964.37	8037.79	2330.68	8765.29	33139.7	2162.82	170354	21728.8	15575.8	48248.8	118655	92473.3	432584	5.63161e+06	3.40054e+06	7.96616e+06	9.5472e+06
NonEU	140	Transmission services of electricity	p40.12	5664.17	314465	169741	4.13094e+06	147085	4551.15	24302.7	1.00083e+06	89185.2	70018	361636	160886	93964.5	115428	9998.76	0	0	223927	458082	3661.09	747.291	197218	646.749	1751.51	21991.4	18483.3	9598.34	298167	160670	796.696	1954.62	528.904	3043.55	6855.44	891.312	28815.1	5009.07	7507.95	67819.7	41007.9	26818.9	84347.8	798126	769966	1.44152e+06	1.73282e+06
NonEU	141	Distribution and trade services of electricity	p40.13	16290.1	362511	210730	3.0089e+06	181783	4336.17	57982.1	8.12839e+06	151249	92177	504961	276676	154235	245112	9938.77	0	0	332543	637395	2863.73	900.219	222212	527.692	1261.7	25170.4	15093.8	7020.18	360104	251456	926.394	3170.41	504.189	4277.12	7776.73	476.039	11772.7	7590.76	4125.04	5209.56	48639.9	33840.5	119557	1.13419e+06	973386	2.21431e+06	3.35166e+06
NonEU	142	Coke oven gas	p40.2.a	4248.6	292425	157996	2.91417e+06	190652	4824.62	21093.6	779772	84699	65678.9	342387	146689	89310.7	132515	11625.2	0	0	235585	391926	7968.86	511.951	175733	668.367	2383	27553.3	33785	11221.2	198738	171363	1083.9	1428.07	655.024	27493.6	12561.9	258.032	10544.4	4619.55	7327.58	4825.85	51154.9	77388.6	54033.7	700413	643546	1.52158e+06	1.59089e+06
NonEU	143	Blast Furnace Gas	p40.2.b	9025.65	616363	300126	7.86604e+06	326433	9815.43	27337.1	1.48054e+06	234812	177153	878979	360792	172989	289859	16156.4	0	0	473909	936505	10709.6	1063.12	341816	1176.72	4926.97	58661.1	61154.3	22447.5	433344	374606	1857.11	2969.86	1291.63	3070.92	16061	441.41	19598.4	7204.35	7719.6	10635.9	89909.6	82781.8	102027	1.98183e+06	2.05575e+06	5.20695e+06	4.66603e+06
NonEU	144	Oxygen Steel Furnace Gas	p40.2.c	240.784	15655.7	7415.35	160037	8926.8	222.992	682.986	48385.9	6148.19	5063.89	24328	9772.09	6338.86	8388.31	391.629	0	0	13274.7	23146.9	245.997	28.3382	8446.8	32.0569	109.075	1750.62	1444.98	593.842	11954	14826.8	69.646	75.055	38.5286	120.505	500.461	10.1105	813.858	327.302	314.879	304.471	2251.25	1231.67	2765.42	50893.7	53486.2	143556	326385
NonEU	145	Gas Works Gas	p40.2.d	617.649	36227.2	26795.5	1.8567e+06	25833.7	460.427	9997.11	224962	13720.3	10599	50528	22442.1	9711.06	17007.8	860.242	0	0	28875.1	56514.9	269.597	24.3764	9994.73	93.6043	416.547	1893.86	1767.02	939.649	40060.2	14798.4	160.275	254.298	92.6282	259.753	803.836	37.6127	7269.22	912.858	2503.65	1015.28	4127.36	6270.7	6100.75	123591	121076	512037	315778
NonEU	146	Biogas	p40.2.e	695.316	38666.3	22981.2	543891	39296.1	600.014	12005.5	184020	16606.5	12911.5	64900.4	33919.3	35904.4	19240.4	1125.89	0	0	47178.7	156283	491.761	36.2914	14385.5	209.366	243.965	2573.19	3614.74	1887.7	91592.2	16774.3	241.84	292.991	53.8932	290.66	661.307	48.5485	876.697	895.013	2348.36	472.964	14444.8	3686.62	7195.51	160676	163416	582474	345398
NonEU	147	Distribution services of gaseous fuels through mains	p40.2.1	45974.4	3.35651e+06	2.53255e+06	3.94567e+07	5.16639e+06	68121.3	180734	1.5738e+07	1.09162e+06	811032	4.40987e+06	2.05391e+06	1.09452e+06	1.31762e+06	207241	0	0	2.1482e+06	4.71816e+06	34955.3	2153.39	742128	7410.35	11846.1	144629	164809	66932.5	1.02529e+06	1.16394e+06	8707.09	57120.6	3980.79	42921.2	61565.5	6528.72	65208.9	47486.5	88095.2	29754.8	431542	343781	463147	1.60639e+07	7.47721e+06	1.61724e+07	2.10278e+07
NonEU	148	Steam and hot water supply services	p40.3	382439	2.87246e+07	1.81766e+07	1.9587e+08	1.75853e+07	381467	1.53744e+06	3.59704e+07	7.10736e+06	5.75147e+06	2.98465e+07	1.31252e+07	7.52012e+06	1.07258e+07	579158	0	0	1.63483e+07	3.39412e+07	309090	38112.6	1.10157e+07	39705.2	91495.7	1.7065e+06	1.24988e+06	490907	1.51197e+07	1.08267e+07	76109.5	139287	42065.8	1.15174e+06	756780	20712.7	353799	608208	505038	400973	6.07294e+06	3.76641e+06	4.86502e+06	6.09608e+07	6.06111e+07	1.11177e+08	1.32171e+08
NonEU	149	Collected and purified water, distribution services of water (41)	p41	1076.96	42430	34731.2	2.04757e+06	56303.8	648.621	11262.6	236820	19935.5	16510.8	79510.8	45605.9	23110.3	21333.8	1215.55	0	0	45668.4	138178	353.038	36.0484	11397.8	85.8949	246.742	2411.29	2538.06	1194.34	13660.3	37126.1	153.756	700.858	89.2999	200.789	1397.71	40.9987	582.942	1859.14	1068.75	872.794	5871.57	3741.62	9796.39	189393	160869	348285	464285
NonEU	150	Construction work (45)	p45	90231.4	982482	644299	7.94243e+06	669491	16259.5	190600	2.60921e+06	297976	238339	1.2247e+06	548021	307345	311928	39608.1	0	0	737129	1.74284e+06	8989.21	791.767	221036	4028.81	3200.29	50745.3	59968.1	32325.1	660651	890678	3568.16	7921.64	1791.91	16353.5	27501.8	1212.46	34047.5	42710.2	51930.9	17599	305743	132568	371949	2.53159e+06	2.16479e+06	3.55662e+06	4.43272e+06
NonEU	151	Secondary construction material for treatment, Re-processing of secondary construction material into aggregates	p45.w	0	0	0	0	0	0	0	0	0	0	0	0	0	0	0	0	0	0	0	0	0	0	0	0	0	0	0	0	0	0	0	0	0	0	0	0	0	0	0	0	0	0	0	0	0	0
NonEU	152	Sale, maintenance, repair of motor vehicles, motor vehicles parts, motorcycles, motor cycles parts and accessoiries	p50.a	62039.9	1.83603e+06	1.01597e+06	1.16562e+07	1.00831e+06	19380.3	118828	3.54084e+06	374899	313393	1.65827e+06	788893	727827	448839	108881	0	0	1.83034e+06	6.83308e+06	5273.62	1758.82	513753	2357.24	6395.24	73311.7	79239.9	62526.3	1.47784e+06	7.37039e+06	4695.89	32770.1	1861.18	35558.1	21567.6	617.209	60091.6	19663.5	16061.3	41176	164226	124875	818005	3.96285e+06	3.75778e+06	6.04641e+06	6.90887e+06
NonEU	153	Retail trade services of motor fuel	p50.b	53108.4	1.49722e+06	1.41246e+06	2.46764e+07	1.44513e+06	17861.5	89750.4	6.45123e+06	455730	311549	1.71262e+06	814151	1.82875e+06	584797	122661	0	0	1.48148e+06	3.40836e+06	7619.85	1200.38	325975	1728.39	3053.94	68762.2	77750.3	55212.3	660900	1.44318e+06	7995.93	23731.6	1113.07	14620.7	18040.9	889.682	54824.3	15405.7	31700.6	18686.7	137081	141488	529074	5.10896e+06	2.7552e+06	5.56916e+06	6.33435e+06
NonEU	154	Wholesale trade and commission trade services, except of motor vehicles and motorcycles (51)	p51	67248.5	3.37729e+06	2.62965e+06	4.58827e+07	2.909e+06	67501.6	397839	1.22735e+07	1.19792e+06	1.0873e+06	5.40078e+06	2.52641e+06	1.94873e+06	1.40162e+06	318610	0	0	3.17859e+06	7.44511e+06	21955.4	6010.89	1.49186e+06	8731.65	27444.7	192629	153758	114022	1.96414e+06	2.47318e+06	21085	44698	4291.82	63556	63054	2151.33	284369	56925.6	48223.6	127815	408678	287258	1.71394e+06	1.66496e+07	1.16336e+07	2.02711e+07	2.35678e+07
NonEU	155	Retail trade services, except of motor vehicles and motorcycles; repair services of personal and household goods (52)	p52	282607	2.08221e+06	1.46237e+06	2.85281e+07	1.56692e+06	93180.9	439927	8.50613e+06	967071	786765	4.72613e+06	1.91029e+06	1.06385e+06	964380	453961	0	0	2.22213e+06	7.02869e+06	15340.7	1832.01	553318	2922.05	32413.5	133774	283682	226969	936316	5.82038e+06	15313.3	256668	2448.68	26996.7	39056.1	1415.03	146935	38024.1	35069.4	49805.7	241846	178692	834632	9.51196e+06	8.26833e+06	1.49839e+07	1.66934e+07
NonEU	156	Hotel and restaurant services (55)	p55	136193	2.8251e+06	1.28737e+06	2.18051e+07	1.26718e+06	42330.8	174770	3.4563e+06	1.05221e+06	959430	5.16069e+06	2.1169e+06	923613	1.31837e+06	63757.3	0	0	2.93934e+06	5.55809e+06	18656.1	4729.88	1.38865e+06	5169.73	15721.1	185383	129360	57794.5	1.37641e+06	7.80734e+06	19137.6	134341	5298.78	48465.8	187343	924.576	40694.7	156854	101581	42765.5	519997	595880	1.46336e+06	1.1156e+07	1.36014e+07	2.01086e+07	2.9003e+07
NonEU	157	Railway transportation services	p60.1	170091	5.99964e+06	2.61289e+06	3.5586e+07	3.38965e+06	209348	787445	1.09573e+07	2.05103e+06	1.93782e+06	1.09681e+07	4.65759e+06	2.57421e+06	2.65677e+06	169263	0	0	5.37921e+06	9.25578e+06	38372.1	23967.8	6.17568e+06	28257	20446.2	1.0851e+06	395103	259074	4.41568e+06	3.44755e+06	12563.1	38151.3	7427	64183.5	106357	21190.7	222431	173248	123529	107841	1.02293e+06	680482	2.59474e+06	2.32056e+07	2.61071e+07	3.53926e+07	4.07674e+07
NonEU	158	Other land transportation services	p60.2	65290.2	4.0919e+06	2.38883e+06	2.99107e+07	2.06004e+06	65741.6	376484	7.6721e+06	1.20327e+06	1.31872e+06	6.09762e+06	2.49249e+06	1.51796e+06	1.59107e+06	155456	0	0	3.04282e+06	1.04697e+07	9766.53	3588.59	904407	6360.3	6910.34	204404	88198.5	54489.1	1.15931e+06	4.68224e+06	6148.82	26808.9	4055.81	25615.4	61404.5	2781.35	135610	53763.8	26207	49938.9	1.50668e+06	609854	1.07227e+06	1.60519e+07	1.92095e+07	2.22192e+07	2.47704e+07
NonEU	159	Transportation services via pipelines	p60.3	1.29099e+06	6.49457e+07	2.34378e+07	2.02117e+08	2.311e+07	1.4438e+06	4.24891e+06	5.47024e+07	1.91343e+07	1.31008e+07	8.01753e+07	3.15844e+07	9.67615e+06	2.01181e+07	1.23451e+06	0	0	3.28367e+07	4.80606e+07	754488	174995	3.88642e+07	107798	476593	9.83806e+06	5.79596e+06	1.24575e+06	5.41806e+08	1.06446e+08	1.12065e+06	1.22293e+06	39624	596662	1.056e+07	423805	737748	2.13737e+06	1.92638e+06	237088	2.5606e+06	3.08468e+06	6.01933e+06	1.19539e+08	2.14265e+08	1.84693e+08	2.4409e+08
NonEU	160	Sea and coastal water transportation services	p61.1	4.27089e+06	3.22085e+07	1.25985e+07	1.83246e+08	1.20719e+07	1.33109e+06	1.1997e+06	4.27383e+07	1.2026e+07	1.1662e+07	7.01839e+07	2.97792e+07	1.24535e+07	1.00258e+07	405723	0	0	3.65591e+07	1.03196e+08	239591	17055.6	5.99632e+06	52545.8	159196	974214	1.5665e+06	688672	2.85817e+07	5.11399e+08	343793	1.23136e+06	31433.1	294644	558258	13020.1	207835	753168	588932	316887	6.96706e+06	6.56425e+06	2.41057e+07	1.48395e+08	2.10775e+08	2.17007e+08	3.2681e+08
NonEU	161	Inland water transportation services	p61.2	1.97565e+06	5.35562e+06	2.25452e+06	3.07588e+07	3.31209e+06	213154	1.3637e+06	1.62156e+07	1.76041e+06	1.7115e+06	1.00471e+07	5.01123e+06	3.81136e+06	3.49051e+06	837862	0	0	6.55828e+06	1.8833e+07	26879.5	4801.85	1.21218e+06	8651.86	40827.7	688768	311976	152198	1.07654e+07	1.66027e+07	67366.6	164759	173574	106922	1.11837e+07	3357.45	96208	746690	287317	44314.8	1.44136e+06	2.3031e+07	3.16069e+06	1.61933e+07	2.06807e+07	2.79445e+07	3.71524e+07
NonEU	162	Air transport services (62)	p62	604677	2.19504e+07	8.8047e+06	1.93032e+08	1.4211e+07	442382	1.93178e+06	3.12493e+07	8.06852e+06	7.88165e+06	3.74254e+07	1.60477e+07	9.05233e+06	9.42827e+06	518793	0	0	2.20848e+07	4.3667e+07	130179	20314.7	5.97861e+06	123566	87872.8	1.63144e+06	909273	620818	1.12326e+07	4.93843e+07	45766.8	291326	48066.9	163994	279883	7036.3	890771	453224	270338	209241	1.00628e+07	1.03938e+07	1.6954e+07	9.29495e+07	8.9041e+07	1.52141e+08	2.07486e+08
NonEU	163	Supporting and auxiliary transport services; travel agency services (63)	p63	453436	8.77946e+06	2.9877e+06	1.13836e+08	4.09582e+06	154958	1.24975e+06	1.6471e+07	2.76353e+06	3.01704e+06	1.43549e+07	7.17163e+06	4.03635e+06	3.53871e+06	828647	0	0	9.08862e+06	2.65979e+07	43589.2	9259.95	2.02366e+06	20108.1	27040.3	579852	373633	263118	3.68939e+06	8.41371e+06	31981.4	150254	18578.1	47889	237764	4581.27	134411	259252	122326	154970	2.62354e+06	1.95137e+06	4.14318e+06	3.04173e+07	4.36332e+07	5.25627e+07	6.83735e+07
NonEU	164	Post and telecommunication services (64)	p64	11230.3	499453	222688	5.6481e+06	315501	8498.59	34790	1.55235e+06	221046	178950	849719	387301	149685	204835	18761.1	0	0	433810	839961	3132.11	601.437	165917	2174.32	1926.49	26111.5	24682.3	16990.5	313197	371607	1481.91	5905.58	899.252	2726.2	8412.81	293.687	9244.32	14363.5	12346.2	6441.5	146308	65392.6	177718	2.38276e+06	2.03173e+06	3.26287e+06	4.2894e+06
NonEU	165	Financial intermediation services, except insurance and pension funding services (65)	p65	29209.9	1.36238e+06	738014	2.29112e+07	1.53475e+06	17228.9	284006	2.89673e+07	845205	727967	3.24242e+06	1.77665e+06	726917	1.40669e+06	49991.5	0	0	1.8218e+06	3.23648e+06	7604.48	1285.21	388322	2769.25	4730.34	137118	55941.8	33421.5	693975	3.38583e+06	2735.06	11903.4	5811.61	7081.89	21621.4	613.787	18077.5	27476.5	27065.2	14323.6	143735	103371	269956	7.42993e+06	6.87941e+06	1.55208e+07	2.54179e+07
NonEU	166	Insurance and pension funding services, except compulsory social security services (66)	p66	15913.9	1.33114e+06	498604	7.38665e+06	627104	17082.5	65251.2	3.05953e+06	297321	249570	1.30926e+06	635939	191493	400855	10138.8	0	0	514568	1.50952e+06	1919.28	562.861	141658	1453.16	1466.86	38575.3	20214.4	12276.3	270928	373934	2055.79	2868.91	889.549	3396.71	7299.23	205.085	9355	8302.48	7335.43	3883.64	110598	146743	157987	2.93019e+06	2.3345e+06	4.5009e+06	7.33852e+06
NonEU	167	Services auxiliary to financial intermediation (67)	p67	17961.6	1.55474e+06	853207	2.80895e+07	2.75927e+06	9392.6	165023	1.93979e+06	276245	237624	1.09381e+06	570827	291801	336168	16327.7	0	0	620428	1.00739e+06	2788.92	636.216	171366	2050.91	1918.71	68905.2	20457.3	13302	399059	633405	1498.49	19793.3	1530.68	4927.56	9003.27	244.828	12971.3	24748.7	67177.9	7976.77	87968	62610.3	252891	3.32728e+06	2.07324e+06	3.91517e+06	5.557e+06
NonEU	168	Real estate services (70)	p70	67162.2	1.06298e+06	984111	9.32271e+06	1.27418e+06	14591.8	456156	2.11256e+06	438489	333916	1.51803e+06	939670	308129	434166	20163.5	0	0	797304	1.40311e+06	4696.17	2147.91	522357	1878.58	3134.65	116506	127863	100605	436291	1.23954e+06	2001.09	12870.1	2153.8	6894.08	13037.2	381.072	7224.55	15387.7	10356.3	6473.36	118460	77148.5	332223	4.06739e+06	4.16333e+06	5.41246e+06	9.68451e+06
NonEU	169	Renting services of machinery and equipment without operator and of personal and household goods (71)	p71	35073.3	2.11722e+06	1.08181e+06	3.20015e+07	1.01685e+06	34903.6	203460	5.99182e+06	705481	607009	3.28927e+06	1.50377e+06	869880	870347	74027.4	0	0	2.67745e+06	1.04276e+07	19977.7	2006.72	741023	4148.63	12458.3	174609	111326	66801.6	1.10395e+07	9.49967e+07	17819.3	31848.2	5194.68	14337	106090	1507.39	46057.5	45561.4	40273.6	22386.3	401019	373056	1.06106e+06	7.45837e+06	7.18197e+06	1.13171e+07	1.44341e+07
NonEU	170	Computer and related services (72)	p72	14260.9	537595	257017	5.04334e+06	235009	7157.5	38801.3	774184	175362	172999	896338	418086	147375	319271	8765.69	0	0	672117	822987	3545.82	740.082	233530	2072.32	2364.72	64141.8	27033.1	17303.8	310726	454526	943.118	5693.52	4129.57	3301.37	6834.51	217.617	5769.72	12968.2	10692.6	5356.26	148125	69678.9	242428	2.23777e+06	2.0981e+06	3.57769e+06	4.69361e+06
NonEU	171	Research and development services (73)	p73	15632.7	1.56949e+06	592528	1.02482e+07	557433	19193.4	19853.7	1.36681e+06	512823	350509	1.79318e+06	929215	264060	404865	47570	0	0	1.57218e+06	1.47591e+06	24619.7	905.426	286985	1772.61	4790.14	74988.6	57018.9	47132.7	420640	1.10336e+06	1951.41	41008.7	2123.27	22615.4	30812.5	452.087	6339.12	477474	66800.4	205961	105873	170754	373717	4.75258e+06	3.20957e+06	6.64025e+06	7.56889e+06
NonEU	172	Other business services (74)	p74	102940	6.27163e+06	2.90286e+06	5.27795e+07	2.77339e+06	83435.4	282373	9.47459e+06	1.9148e+06	1.86696e+06	9.1896e+06	4.7721e+06	1.7286e+06	3.30504e+06	187441	0	0	6.35223e+06	2.2526e+07	38444.8	5391.45	1.73848e+06	33971	19051.5	720808	357483	235506	2.77165e+06	1.74081e+07	19716.8	93800.1	45411.7	30933.1	81005.8	2978.14	168380	146322	165667	52441	2.14407e+06	877587	1.73389e+06	3.50953e+07	2.78079e+07	4.24933e+07	5.43915e+07
NonEU	173	Public administration and defence services; compulsory social security services (75)	p75	902.001	51030.1	19186.8	371188	19175.2	1342.73	1546.27	86398.2	28084.5	15844.9	98761.6	34053.6	10093.4	12921.5	690.601	0	0	62091	97391.1	231.44	74.9347	21902.3	297.21	587.464	1962.25	3602.46	2600.89	29024.4	147871	699.947	3038.83	186.04	546.142	713.255	20.3684	408.025	2565.98	3879.61	600.745	28977.3	8533.45	29973.4	253003	133206	352499	393105
NonEU	174	Education services (80)	p80	2700.79	19253.7	8942.46	137615	12272.3	168.49	2070.31	25937.1	12087.5	7257.74	30831.4	13976.4	6895.24	6029.44	239.327	0	0	15880.6	40658.8	70.0449	7.01707	2751.13	23.0432	106.785	665.453	1395.05	802.351	7304.93	13852.8	260.497	347.604	75.8643	46.1689	233.819	9.64795	119.107	270.482	336.429	289.782	2090.51	1600.97	4249.11	78609.9	46077.9	113293	131928
NonEU	175	Health and social work services (85)	p85	632.911	31017.2	12552.1	282068	10220.6	468.327	908.95	52607.4	9317.21	7757.28	45499.5	19507.8	21162.4	11509.2	3415.39	0	0	24266.4	42048	356.309	41.7749	13498.7	38.348	269.668	2246.8	2601.49	955.324	12082.4	18375.9	933.248	308.488	46.6368	299.168	534.636	16.5151	424.812	797.751	864.754	352.876	2602.61	1894.51	7597.05	99423.1	73973.3	140090	157343
NonEU	176	Food waste for treatment: incineration	p90.1.a	2664.31	88893.3	39235	658416	76749.8	1702.23	13534.2	229292	23259	24385.8	145731	61846.3	55836.7	47850.1	27141.4	0	0	135242	306076	524.756	269.903	85186.2	107.178	644.863	6426.07	6158.2	17486	30358.2	125191	286.641	14294.6	115.253	4856.12	45472.5	75.4404	1630.93	75989.5	30822.3	4778.8	15152.3	11789.8	37049.7	293649	306273	484764	633837
NonEU	177	Paper waste for treatment: incineration	p90.1.b	2123.04	51028.8	26171.5	439060	46580.1	1102.47	12047.4	157287	15107.5	15496	81936.5	38907.6	42379.4	26868.1	26925.3	0	0	81390.3	276678	286.916	133.815	40998.9	59.1425	223.445	4910.77	2729.95	9869.13	21449.3	72003.4	128.121	13170.9	93.076	998.113	16076.3	181.361	1400.73	20380.4	7013.6	3188.81	6937.52	7186.7	15999.5	169212	183964	285732	355620
NonEU	178	Plastic waste for treatment: incineration	p90.1.c	7844.25	453323	246973	2.14298e+06	226275	7315.12	30929	551479	96255.4	95717.3	500753	223890	383006	179452	36033.5	0	0	589695	1.5192e+06	1350.15	1789.03	436501	487.735	1144.46	41962.7	18171.9	32765.4	418302	582537	847.003	30604.4	585.737	13788.2	48509	893.306	3813.77	65815.7	17014.6	12259.9	55006.1	45247.3	229482	1.09736e+06	1.06477e+06	1.58363e+06	1.94488e+06
NonEU	179	Intert/metal waste for treatment: incineration	p90.1.d	25438.1	682181	353741	2.72672e+06	424156	12075.2	23082.7	723459	148026	177669	888386	321250	210211	298651	25325.9	0	0	627937	1.24216e+06	2302.16	1655.86	458814	836.346	2178.66	79247.9	22959	57284.2	379395	672030	1364.52	91058.9	4490.36	19793.6	92616.3	250.034	3933.84	245703	85877.8	27795.6	159322	185738	264530	1.37631e+06	1.91468e+06	2.36415e+06	2.77481e+06
NonEU	180	Textiles waste for treatment: incineration	p90.1.e	5745.08	388851	188350	1.61046e+06	196118	7928.2	28121.9	421374	85301	99162.1	525106	214775	461029	195754	26905.4	0	0	901093	672601	1146.69	1651.37	398553	371.48	997.997	43574.8	25593.2	54971.3	436820	497962	747.949	57161.7	766.969	8515.62	70814.8	174.037	2236.65	35053.1	16004	3476.33	43201.4	37981.6	192371	820857	1.10643e+06	1.48036e+06	2.20422e+06
NonEU	181	Wood waste for treatment: incineration	p90.1.f	627.345	28659.6	15660.4	236542	34474.1	483.302	9887.15	98710.8	8876.48	9521.94	48490.4	23469.2	28445.4	13706.6	25648.3	0	0	54182.7	195086	136.859	57.6034	17869.5	28.7694	124.989	1499.58	1526.34	4193.72	13903	32716.7	59.2634	8870.27	42.743	749.004	8125.8	17.6298	616.025	14557.5	4978.1	1792.26	4324.03	4169.04	12163.2	97417.6	105552	167595	206468
NonEU	182	Oil/hazardous waste for treatment: incineration	p90.1.g	5071.08	236590	130943	1.05351e+06	126703	3403.9	14308.6	279870	60373	69463.3	312883	122060	213890	104007	22037.3	0	0	192261	560346	786.334	619.517	163283	300.434	676.292	21933.2	7080.2	21763.9	195820	342918	410.554	47365.7	4548.69	5938.71	21843.2	92.5072	1898.16	52527.8	10312.9	10803.4	51433.4	58541.7	112293	524584	637158	883962	1.01365e+06
NonEU	183	Food waste for treatment: biogasification and land application	p90.2.a	326.886	10424.4	7698.11	133833	20241.9	197.139	8614.72	67684.7	4629.26	4437.09	20707.6	12281.3	21071	5834.58	24870.6	0	0	26161.8	83213.5	83.9575	14.6798	4915.18	21.7214	62.8988	1009.14	1336.18	1002.27	8310.49	15141.8	52.7768	1531.26	19.8704	154.541	649.963	19.7742	212.692	1013.48	440.638	186.978	1566.78	1114.2	3322.96	40230.6	41751.4	93257.4	103375
NonEU	184	Paper waste for treatment: biogasification and land application	p90.2.b	126.365	5010.25	2815.47	79943.2	12042.8	66.1357	428.515	51294.9	2575.34	2443.06	11503.8	7219.88	3281.25	3342.28	201.705	0	0	27809.6	72674.3	30.8072	6.39658	1888.5	9.17524	19.6051	382.539	595.551	435.354	2923.81	5197.13	12.5513	542.188	9.0926	112.002	204.691	7.69543	156.123	163.875	239.605	94.4001	629.234	543.01	1066.39	26741.1	30114.4	69877.5	75141.2
NonEU	185	Sewage sludge for treatment: biogasification and land application	p90.2.c	3427.42	299110	126478	1.85331e+06	158912	7498.57	17871.9	461342	74660.3	79406.7	434885	166574	116147	84629.3	5261.17	0	0	243906	534366	1502.75	339.915	108207	1478.24	1289.67	8118.25	15930.9	81818.3	67423.9	208768	560.125	23800.1	249.065	8370.9	48926.3	358.048	2771.08	200715	42252.7	36331.6	110699	79527.5	137122	1.11586e+06	826897	1.20684e+06	1.41762e+06
NonEU	186	Food waste for treatment: composting and land application	p90.3.a	6226.17	294330	192524	2.06235e+06	271324	5910.41	26077.1	873793	87663.8	88741.6	467789	206150	135013	169922	41820.8	0	0	301177	5.83161e+06	1528.78	627.245	208265	692.491	1185.24	33334.3	15427.6	43424.9	137438	3.11025e+06	873.262	28268.4	2224.67	7726.66	66024.6	1081.3	11976	85577.2	20239.9	15509.2	81756.7	74992	96899	1.12098e+06	1.01366e+06	1.83071e+06	1.90682e+06
NonEU	187	Paper and wood waste for treatment: composting and land application	p90.3.b	279.637	10580.6	6054.18	141402	21863.9	180.483	11509.2	89282	4669.81	4025.58	19367.6	12559.6	28520.5	5897.81	581.504	0	0	34902.6	122413	76.5984	9.87283	3217.87	29.0131	40.9496	556.944	892.517	602.787	7186.82	5668.35	24.9107	312.061	18.4678	62.8715	394.932	13.1913	233.54	2324.5	1501.5	203.779	1749.03	1225.1	2194.23	45252.1	49484.2	95882.5	112836
NonEU	188	Food waste for treatment: waste water treatment	p90.4.a	16092	1.44039e+06	621079	1.04134e+07	725928	20132.1	108959	2.38735e+06	308310	268662	1.40126e+06	635671	924927	357278	139933	0	0	794278	2.36291e+06	5712.04	1514.86	436239	3941.36	4534.9	59056.7	52730.8	143012	418528	726799	2691.54	33086	1348.16	13958.9	128617	1571.94	39295.6	322586	84338.4	64568.7	332129	185026	336610	4.02696e+06	2.78078e+06	5.31793e+06	6.21946e+06
NonEU	189	Other waste for treatment: waste water treatment	p90.4.b	20043	1.06249e+06	470941	1.11112e+07	1.25344e+06	22163.6	66965.5	1.7537e+06	307170	291309	1.48182e+06	666330	1.05371e+06	413656	177945	0	0	804113	2.16026e+06	6048.25	2301.34	639699	1971.98	4222.05	111004	49829.2	137595	554643	1.11779e+06	2362.61	89382.9	2010.64	16196.4	104639	730.564	18540.1	318435	68985.1	66309.3	204975	160413	435205	4.94481e+06	3.36978e+06	5.74208e+06	7.71232e+06
NonEU	190	Food waste for treatment: landfill	p90.5.a	47169.7	2.69369e+06	1.50195e+06	1.55922e+07	2.48227e+06	65431.9	106765	6.46993e+06	707414	697124	3.43908e+06	1.61054e+06	7.1832e+06	1.0798e+06	27743.9	0	0	1.97142e+06	6.65293e+06	16786.7	8439.36	2.04839e+06	12499	9647.62	323152	151886	468889	2.49971e+06	4.12443e+06	5239.45	63834.1	9768.53	75524.3	278099	2913.59	56008.3	947194	135579	218030	1.15021e+06	804119	1.33046e+06	1.13018e+07	7.2582e+06	1.17314e+07	1.4281e+07
NonEU	191	Paper for treatment: landfill	p90.5.b	16320.3	821155	399578	5.15171e+06	669407	22280.1	36998.1	1.79068e+06	226066	236251	1.14537e+06	496818	976590	328894	21822.8	0	0	672059	2.16336e+06	4359.51	1904.04	497868	4065.64	2798.6	59197.3	49716.4	183601	514617	1.05132e+06	1393.84	32643	4870.99	15271.2	127553	783.208	17426.8	391456	64675.4	83711.7	396773	285687	359094	3.4182e+06	2.43968e+06	3.76489e+06	4.77366e+06
NonEU	192	Plastic waste for treatment: landfill	p90.5.c	3587.47	207206	119880	1.11096e+06	120960	4476.1	15498.9	315929	51167.6	46887.3	249640	106400	189841	77624.8	15666.7	0	0	158530	377949	1084.99	779.758	187434	473.07	598.03	20117	8033.5	27208.2	224854	217114	405.011	3332.26	646.745	6380.69	24680.8	177.765	4348.67	56240	9260.16	12880.5	37166.2	39932.9	90078.5	587133	512386	777985	958143
NonEU	193	Inert/metal/hazardous waste for treatment: landfill	p90.5.d	7469.17	174817	96335.6	994360	110629	4564.34	9480.86	222739	46295.5	49487.1	258259	102245	64945.8	75551.6	4589.94	0	0	159991	378573	1133.34	463.538	128853	340.131	638.265	13398.4	8366.29	66285.4	111654	181688	368.805	24113.5	1114.65	4749.48	35230.4	94.2937	2796.15	151932	21050.4	32901.7	39695.2	64968.1	75985.1	513135	567212	748571	1e+06
NonEU	194	Textiles waste for treatment: landfill	p90.5.e	2892.96	133370	88604.4	844063	118282	3301.6	10616.2	318664	36678.8	37525	178246	77945.6	550705	56258.1	15003.7	0	0	121228	344087	858.543	267.971	67614.6	646.246	403.424	10943.1	8067.32	25211.7	96155	103001	216.249	2546.7	1459.67	2956.46	28989	129.27	4399.18	39375.1	4925.51	9284.46	58897.2	41430.7	49745.4	502889	375817	615407	719668
NonEU	195	Wood waste for treatment: landfill	p90.5.f	6149.49	296878	165979	1.75026e+06	170157	6865.39	18373.2	432081	76352.6	72273.1	366588	161970	173497	107754	14003.5	0	0	233402	623007	1555.08	958.54	231454	1418.85	876.414	26834.6	15207.5	49880	297860	318857	567.319	4432.7	1494.16	8184.48	48725.7	301.097	6739.03	92765.7	15763	22197.7	115721	79348.8	125053	947399	747320	1.18214e+06	1.50672e+06
NonEU	196	Membership organisation services n.e.c. (91)	p91	511.799	19936.6	9709.38	392184	18790.3	404.166	2064.93	38556.8	7237.49	5899.8	29081.3	14437.1	4908.14	6759.61	1088.62	0	0	15824.9	30856.6	167.566	13.9653	4930.51	120.096	94.7376	952.896	1550.02	967.658	9119.92	10825.8	58.3175	148.418	36.084	70.5739	352.128	17.6501	341.057	684.313	770.084	268.007	4999.85	2345.82	7338.87	95125.2	65447.3	129191	159497
NonEU	197	Recreational, cultural and sporting services (92)	p92	5365.45	334950	137745	2.40777e+06	140081	4789.25	16194.6	385388	95623.8	83817.9	447064	208469	69194.4	116489	7889.34	0	0	253635	391522	1273.53	253.065	69593.7	795.15	917.436	25005.4	12809.3	9822.01	333835	166339	836.806	3985.65	855.188	1556.96	4056.03	151.115	5831.51	6092.72	5559.14	2752.61	56627.1	32218.7	81714.6	1.28351e+06	1.14673e+06	1.88816e+06	2.32341e+06
NonEU	198	Other services (93)	p93	3045.03	105516	188012	2.01005e+06	56602.5	2331.99	10503.6	247690	52046.3	45623.8	227883	106502	51238.9	75968.9	28719.9	0	0	131919	367840	2604.56	135.363	45352.1	340.882	636.289	8353.5	7993.82	6161.94	62601.6	119453	579.955	1700.68	278.984	2426.48	2847.76	82.7087	3648.69	5720.87	5543.06	2411.89	27621	16193	36218.3	554182	583626	915450	1.04111e+06
NonEU	199	Private households with employed persons (95)	p95	193.941	11549.6	4448.3	115516	4918.95	202.977	520.417	38379.4	3759.59	2518.76	14026.6	6594.9	2186.15	4194.82	317.112	0	0	13463.1	20493.4	163.521	13.6205	4045.77	32.1058	110.232	705.371	1606.82	774.053	5272.95	8881.53	31.3023	51.9046	15.7343	25.489	1406.66	9.73156	202.911	242.58	742.491	285.804	1463.14	732.652	1712.54	34307.9	26174.7	62375.4	181327
NonEU	200	Extra-territorial organizations and bodies	p99	0	0	0	0	0	0	0	0	0	0	0	0	0	0	0	0	0	0	0	0	0	0	0	0	0	0	0	0	0	0	0	0	0	0	0	0	0	0	0	0	0	0	0	0	0	0
EU	1	Paddy rice	p01.a																				7.0236e-07	6.74233e-07	4.92292e-07	4.27937e-06	4.0766e-07	9.19587e-05	1.76046e-06	2.5731e-06	6.00083e-06	7.07893e-07	2.30371e-07	3.29443e-06	9.51765e-06	2.81575e-07	6.91103e-06	8.53706e-07	1.60645e-06	1.14025e-05	5.12942e-06	5.31018e-06	3.90051e-06	8.98992e-06
EU	2	Wheat	p01.b																				1.38212e-05	3.08776e-05	2.26443e-05	4.92644e-06	1.35399e-05	4.17069e-05	4.2372e-05	0.000100832	7.76776e-05	1.75526e-05	7.85994e-06	4.94611e-05	7.65039e-06	8.17895e-06	0.000128807	8.05133e-05	0.009473	0.000365846	0.000204903	0.00199437	0.000117372	0.000714177
EU	3	Cereal grains nec	p01.c																				1.24298e-05	4.19579e-05	3.20917e-05	6.18961e-06	7.49443e-06	9.42372e-05	3.59565e-05	0.000248363	5.56575e-05	1.23005e-05	4.56552e-06	4.1238e-05	1.05913e-05	6.09546e-06	0.00012393	2.4594e-05	0.000105555	0.000434388	9.69355e-05	0.000185428	7.27093e-05	0.000320984
EU	4	Vegetables, fruit, nuts	p01.d																				3.95276e-06	5.80022e-06	4.55931e-06	3.10566e-06	2.22591e-06	5.72497e-05	1.12446e-05	1.65769e-05	1.74971e-05	4.50501e-06	1.42116e-06	7.94126e-06	6.11114e-06	5.01003e-06	4.35566e-05	5.63706e-06	1.43514e-05	6.28794e-05	2.14077e-05	3.12244e-05	2.77705e-05	0.000146873
EU	5	Oil seeds	p01.e																				5.92018e-06	1.54923e-05	8.69403e-06	2.59132e-06	4.3833e-06	4.19856e-05	2.87915e-05	4.11739e-05	3.79176e-05	9.37909e-06	3.30248e-06	1.97289e-05	3.52481e-06	5.82012e-06	3.61582e-05	2.46486e-05	2.21069e-05	0.000105734	4.27357e-05	6.56311e-05	4.71073e-05	0.000224988
EU	6	Sugar cane, sugar beet	p01.f																				5.14223e-06	6.42048e-06	5.35422e-06	1.25541e-06	1.00174e-05	0.00139503	3.32625e-05	3.28403e-05	3.82351e-05	1.12527e-05	7.08826e-07	9.43693e-06	8.74614e-07	1.39855e-06	1.25572e-05	1.59631e-05	3.04634e-05	5.07375e-05	6.22021e-05	1.80904e-05	1.44011e-05	0.00090457
EU	7	Plant-based fibers	p01.g																				1.6294e-07	2.22561e-07	1.74848e-07	8.44032e-07	1.18852e-07	1.32778e-06	4.38591e-07	5.29735e-07	7.21107e-07	3.62782e-07	1.2345e-07	1.97517e-07	1.28969e-07	5.4543e-08	4.31039e-07	8.79288e-07	1.2664e-06	5.90482e-05	6.55571e-05	2.23969e-06	3.26722e-06	7.02954e-06
EU	8	Crops nec	p01.h																				2.13529e-06	8.93651e-06	6.4296e-06	6.68075e-07	1.41806e-06	1.8332e-05	1.35192e-05	2.85837e-05	1.63262e-05	2.43277e-06	1.13207e-06	5.88423e-06	1.0294e-06	1.66145e-06	1.66901e-05	5.00516e-06	8.73022e-06	3.97453e-05	1.4237e-05	2.53231e-05	1.54542e-05	2.1245e-05
EU	9	Cattle	p01.i																				2.39497e-05	5.1656e-05	3.64249e-05	1.57968e-05	3.39682e-05	9.04801e-05	8.99878e-05	0.000228754	0.0001073	4.76462e-05	1.5706e-05	9.42011e-05	1.10501e-05	9.71889e-06	0.000152434	4.22772e-05	0.000113546	0.000554035	0.000223958	0.000271491	0.000365604	0.00290121
EU	10	Pigs	p01.j																				7.27068e-06	0.000111199	9.31835e-05	3.43455e-06	6.28109e-06	3.27882e-05	2.90585e-05	5.85543e-05	2.64054e-05	1.17624e-05	3.33446e-06	2.77401e-05	3.13534e-06	2.16358e-06	3.24953e-05	1.10172e-05	1.08841e-05	0.000141712	4.48953e-05	5.12337e-05	7.56465e-05	0.000498883
EU	11	Poultry	p01.k																				2.25557e-06	6.77655e-06	4.14592e-06	2.15501e-06	1.92519e-06	3.85537e-05	8.35663e-06	1.2972e-05	1.79934e-05	7.3571e-06	2.24074e-06	1.0395e-05	3.98416e-06	1.013e-06	3.31442e-05	4.46063e-06	5.41378e-06	8.62845e-05	2.8254e-05	2.52725e-05	2.10881e-05	0.000101406
EU	12	Meat animals nec	p01.l																				3.46727e-06	3.34526e-06	2.70422e-06	2.09419e-06	3.15252e-06	7.82174e-06	4.48379e-05	0.000144413	1.53536e-05	8.89024e-06	2.61265e-06	1.57045e-05	1.02229e-06	1.62873e-06	2.29988e-05	1.33964e-05	3.37129e-05	0.000128382	5.42521e-05	6.80315e-05	4.57892e-05	0.000231246
EU	13	Animal products nec	p01.m																				4.13865e-07	4.13568e-07	3.13994e-07	1.31719e-07	1.94277e-07	1.01407e-06	2.67403e-06	1.08111e-05	1.64227e-06	8.29577e-07	5.27669e-07	1.63984e-06	1.29934e-07	1.53308e-07	2.80892e-06	1.38024e-06	1.54428e-06	1.49904e-05	4.45742e-06	7.81325e-06	3.37413e-06	3.76087e-06
EU	14	Raw milk	p01.n																				2.98457e-05	6.56477e-05	5.91312e-05	2.63565e-05	5.7643e-05	0.000262698	0.000137669	0.000376943	0.000123467	5.10608e-05	1.24337e-05	9.77602e-05	2.77154e-05	1.26438e-05	0.000227827	4.72295e-05	7.48083e-05	0.000811374	0.00029228	0.000354905	0.000381268	0.00194722
EU	15	Wool, silk-worm cocoons	p01.o																				1.25941e-05	0.00127751	1.52768e-05	2.33464e-06	9.16009e-06	4.14205e-05	3.91049e-05	3.02207e-05	7.69362e-05	1.20409e-05	5.11405e-06	1.88614e-05	1.59833e-06	3.64603e-06	3.76704e-05	2.98138e-05	1.14321e-05	0.000229504	5.88365e-05	5.60805e-05	0.000288008	0.0029008
EU	16	Manure (conventional treatment)	p01.w.1																				0	0	0	0	0	0	0	0	0	0	0	0	0	0	0	0	0	0	0	0	0	0
EU	17	Manure (biogas treatment)	p01.w.2																				0	0	0	0	0	0	0	0	0	0	0	0	0	0	0	0	0	0	0	0	0	0
EU	18	Products of forestry, logging and related services (02)	p02																				3.91974e-05	5.64068e-05	5.43504e-05	3.45802e-06	7.24476e-05	5.9276e-05	8.53907e-05	0.000180102	0.000486663	8.66542e-06	1.18467e-06	6.30048e-06	2.50704e-05	5.41e-06	4.63257e-05	8.40334e-06	8.63485e-06	0.000151773	4.19878e-05	8.2998e-05	4.74724e-05	5.10295e-05
EU	19	Fish and other fishing products; services incidental of fishing (05)	p05																				4.13578e-07	1.27742e-06	1.09086e-06	2.92623e-07	4.66329e-07	3.16383e-06	1.34387e-06	3.12015e-06	1.80744e-06	1.06953e-06	2.79079e-07	3.69347e-06	5.0637e-07	1.9228e-07	8.73111e-06	1.13337e-06	2.51057e-06	1.61182e-05	6.06221e-06	5.78264e-06	5.70907e-06	2.04223e-05
EU	20	Anthracite	p10.a																				0.374714	1.5804e-05	1.90584e-05	9.73141e-06	4.34335e-05	2.03276e-05	0.000207096	1.93563e-05	7.47645e-05	4.61629e-06	1.43019e-06	7.41631e-06	2.45998e-05	5.75783e-07	1.50633e-05	1.30224e-05	1.98633e-05	0.00011235	1.94286e-05	9.7053e-05	1.42204e-05	3.45471e-05
EU	21	Coking Coal	p10.b																				0.000181695	0.765453	0.000143327	3.38283e-06	5.32935e-05	0.0004063	0.0012634	0.00408661	0.000203319	2.6154e-05	2.33925e-05	6.00005e-05	2.51989e-06	7.39025e-06	0.000233572	2.50017e-05	4.13246e-05	0.000971114	0.000123611	5.93062e-05	4.77992e-05	4.67759e-05
EU	22	Other Bituminous Coal	p10.c																				0.000375038	0.00387856	0.630811	7.34184e-05	0.00316651	0.00219803	0.00117212	0.00032263	0.00026091	5.48177e-05	8.29186e-06	1.62225e-05	2.47534e-05	4.84705e-05	0.000136315	0.000163215	3.50629e-05	0.000590823	0.000137016	0.000168704	0.000408707	0.000369485
EU	23	Sub-Bituminous Coal	p10.d																				4.40103e-06	4.95326e-07	5.15452e-07	0.0606814	4.681e-07	1.81506e-07	2.55308e-07	2.21398e-07	5.62303e-07	6.2795e-08	1.12244e-08	0.000112742	1.59776e-06	2.19901e-08	1.705e-07	5.06575e-07	3.42695e-07	4.46995e-06	3.21891e-07	1.16503e-06	2.06847e-07	1.8309e-06
EU	24	Patent Fuel	p10.e																				2.32909e-07	1.87167e-06	1.58e-06	2.37165e-06	0.959196	4.64219e-07	8.94759e-06	2.15061e-05	5.28788e-07	1.62069e-06	2.2336e-08	9.17505e-08	3.25686e-08	7.25596e-08	5.09044e-07	9.60073e-08	4.12985e-06	2.01129e-06	1.04534e-06	1.43947e-06	7.63061e-05	2.62441e-05
EU	25	Lignite/Brown Coal	p10.f																				0.00605802	0.000609909	0.00060774	0.000500208	0.00162714	0.74259	0.0123647	4.56194e-05	0.00017741	9.53149e-06	2.5906e-06	1.28213e-05	0.000200298	2.57538e-05	3.38769e-05	8.80363e-05	1.39886e-05	0.000114756	4.82265e-05	8.82879e-05	0.00015746	8.09308e-05
EU	26	BKB/Peat Briquettes	p10.g																				0.000193845	4.18664e-06	1.14632e-05	2.6894e-06	5.94785e-05	2.24706e-05	0.788298	8.05262e-06	0.000490367	1.53915e-05	4.27711e-06	1.30322e-06	1.34413e-06	7.33005e-07	4.96549e-06	7.2459e-06	4.70798e-06	2.28983e-05	0.000214398	2.48419e-05	1.22731e-05	1.43373e-05
EU	27	Peat	p10.h																				4.82701e-06	8.84983e-07	1.22372e-06	1.0306e-06	1.23182e-06	5.83603e-06	0.000265557	0.423751	1.91723e-06	9.13458e-07	7.96855e-08	1.39236e-05	1.07579e-07	3.30524e-07	7.61031e-06	3.97457e-07	6.10006e-07	5.96514e-05	4.35237e-06	2.28049e-05	5.16086e-06	9.48775e-06
EU	28	Crude petroleum and services related to crude oil extraction, excluding surveying	p11.a																				4.83857e-05	0.000220476	0.000198171	0.000144219	0.000219459	0.000618346	0.000348478	0.000814662	0.307349	0.000422667	4.62022e-05	0.00910959	1.30692e-05	7.0828e-05	0.000724255	0.000644826	0.000264488	0.0022142	0.00335232	0.00110266	0.00350681	0.00178331
EU	29	Natural gas and services related to natural gas extraction, excluding surveying	p11.b																				0.000132738	6.77535e-05	6.99951e-05	2.45646e-05	0.000504246	0.00662634	0.000384676	0.000652345	0.00474325	0.517104	0.000201147	0.0017405	3.74532e-05	7.551e-05	9.27727e-05	0.000260627	0.000222084	0.000439229	0.00523382	0.00149158	0.000385764	0.000291297
EU	30	Natural Gas Liquids	p11.b.1																				5.90497e-06	1.34918e-05	1.02801e-05	6.00857e-05	0.000313991	0.00172978	2.6468e-05	1.792e-05	0.000927271	4.04757e-06	0.91088	0.000380446	0.000187693	0.00234688	0.00040171	3.41871e-05	2.86106e-05	0.000155452	2.77054e-05	0.000616749	8.76501e-05	0.000101492
EU	31	Other Hydrocarbons	p11.c																				4.52495e-06	5.58665e-06	1.63903e-06	3.38956e-06	6.66501e-07	7.6312e-06	0.000335313	0.000807305	5.35317e-06	4.21186e-06	1.48339e-06	0.911403	3.48671e-07	9.91867e-07	7.37044e-06	3.18328e-06	1.76108e-06	5.33943e-05	4.1511e-05	2.82839e-05	2.57913e-05	2.01993e-05
EU	32	Uranium and thorium ores (12)	p12																				1.96702e-06	5.09302e-07	3.29222e-07	3.96984e-07	4.35283e-07	1.2903e-06	1.89477e-06	4.63765e-06	1.9141e-06	7.22528e-07	4.41636e-07	5.95701e-07	0.981678	9.10104e-07	1.84261e-06	1.84347e-06	2.25473e-06	1.83427e-05	8.63912e-06	1.04479e-05	4.03615e-06	4.67355e-06
EU	33	Iron ores	p13.1																				5.51597e-06	6.92324e-06	4.85389e-06	5.46761e-07	2.0898e-06	9.32033e-06	1.29003e-05	8.77072e-06	1.94064e-05	5.57238e-06	8.09373e-07	1.11172e-06	1.60081e-06	0.970739	3.21083e-05	0.0150729	0.00353321	7.38063e-05	0.000353531	5.16595e-05	9.67917e-06	0.00035547
EU	34	Copper ores and concentrates	p13.20.11																				1.23898e-05	9.66992e-05	7.98315e-05	8.7827e-06	0.000185293	0.0001853	2.96013e-05	2.34703e-05	2.2062e-05	6.01622e-06	1.34278e-06	6.02251e-05	1.13579e-05	4.92681e-05	0.763334	0.000703276	5.63989e-06	0.102117	0.0202317	0.000153865	9.48506e-05	0.000346911
EU	35	Nickel ores and concentrates	p13.20.12																				8.88015e-07	2.40427e-06	1.91201e-06	8.30757e-08	5.94747e-07	1.48086e-06	2.17551e-06	1.22476e-06	2.78999e-06	8.53609e-07	8.14172e-08	2.34024e-07	1.78937e-07	2.81278e-06	3.0762e-05	0.0151481	3.72479e-06	0.000164393	1.50447e-05	8.90975e-06	3.05425e-06	5.91701e-06
EU	36	Aluminium ores and concentrates	p13.20.13																				7.93856e-07	1.43312e-06	7.32525e-07	1.61824e-07	3.67126e-07	2.7328e-06	2.8411e-06	2.19698e-06	4.36061e-06	4.38689e-07	1.01112e-07	9.37323e-07	2.36673e-07	5.90931e-07	2.62543e-06	5.5336e-05	0.0137255	9.85243e-06	5.48907e-06	4.62869e-06	1.37412e-06	4.04556e-06
EU	37	Precious metal ores and concentrates	p13.20.14																				5.0913e-07	2.10087e-06	1.19101e-06	1.34747e-07	2.16519e-06	1.49945e-06	1.42581e-06	2.28842e-06	1.5007e-06	5.28797e-07	8.46883e-08	1.0385e-06	2.01056e-07	5.28479e-06	0.000884397	6.94881e-06	3.50715e-07	0.317061	0.000318171	5.57167e-06	3.84527e-06	7.24126e-06
EU	38	Lead, zinc and tin ores and concentrates	p13.20.15																				2.53457e-06	5.9053e-06	3.05875e-06	3.39131e-07	2.26975e-06	4.62029e-06	6.67148e-06	6.65131e-06	7.9497e-06	2.09493e-06	5.10149e-07	0.000148995	4.83974e-07	3.49408e-06	0.00016581	4.55175e-06	1.98393e-06	0.000954092	0.536015	5.75186e-05	7.24945e-06	1.08929e-05
EU	39	Other non-ferrous metal ores and concentrates	p13.20.16																				7.05961e-06	1.31352e-05	1.12753e-05	1.9357e-06	3.53273e-06	4.29933e-05	2.88731e-05	7.74864e-06	5.55184e-05	1.56723e-06	6.68684e-07	2.17706e-05	2.30182e-06	3.73444e-06	0.000119263	0.000299735	2.24353e-05	0.000464077	9.74984e-05	0.111192	1.70798e-05	2.3242e-05
EU	40	Stone	p14.1																				5.39099e-05	3.48228e-05	2.56683e-05	0.00127497	2.009e-05	0.000116333	0.000338712	0.000708365	4.84645e-05	9.11652e-06	1.80202e-06	1.06286e-05	7.71975e-06	1.74492e-05	6.69108e-05	2.03718e-05	2.49364e-05	0.000279522	5.74752e-05	0.000140434	0.535147	0.0145727
EU	41	Sand and clay	p14.2																				0.000122682	6.60427e-05	4.10863e-05	0.00203006	7.68767e-05	0.000234953	0.0003578	0.00059469	0.000205001	2.40464e-05	5.68606e-06	0.000103699	1.29556e-05	2.93216e-05	0.00539905	8.58956e-05	4.44265e-05	0.0126889	0.000921317	0.00807285	0.0976557	0.695915
EU	42	Chemical and fertilizer minerals, salt and other mining and quarrying products n.e.c.	p14.3																				7.32109e-06	5.60032e-06	7.62636e-06	1.48288e-06	2.34667e-05	1.48572e-05	2.84482e-05	0.000182326	2.15601e-05	3.14859e-06	1.25758e-06	4.83493e-06	9.59589e-07	4.57433e-06	6.79559e-05	2.00938e-05	9.54841e-06	0.000122197	2.9969e-05	6.16863e-05	0.000359734	0.000359268
EU	43	Products of meat cattle	p15.a																				3.23865e-07	5.03996e-07	4.1462e-07	4.1404e-07	2.54879e-07	7.89217e-07	2.00161e-06	4.05894e-06	1.82061e-06	8.57029e-07	2.29907e-07	3.26494e-06	7.93657e-08	1.33393e-07	2.50855e-06	4.45856e-07	5.40377e-07	1.11921e-05	4.40658e-06	3.06729e-06	7.62189e-06	1.13363e-05
EU	44	Products of meat pigs	p15.b																				4.43726e-07	2.35114e-06	1.89714e-06	2.63904e-07	2.62231e-07	1.53551e-06	1.68954e-06	2.63381e-06	2.25213e-06	9.17064e-07	1.97025e-07	4.05533e-06	1.0901e-07	1.92887e-07	4.29559e-06	9.55575e-07	8.13474e-07	1.40166e-05	4.85276e-06	3.71908e-06	5.3434e-06	9.83709e-06
EU	45	Products of meat poultry	p15.c																				1.3133e-07	2.16847e-07	1.70864e-07	4.00452e-08	6.04812e-08	2.59557e-07	2.97738e-07	6.41383e-07	1.21969e-06	5.77184e-07	1.8373e-07	1.38171e-06	3.06112e-08	6.42111e-08	1.22387e-06	4.48735e-07	5.52635e-07	5.78783e-06	1.83148e-06	2.37432e-06	1.12267e-06	1.39929e-06
EU	46	Meat products nec	p15.d																				2.59965e-07	3.78419e-07	2.89591e-07	8.46361e-07	1.31672e-07	4.73756e-07	3.47926e-06	7.94334e-06	1.20261e-06	5.86632e-07	1.61937e-07	1.0005e-06	5.48115e-08	8.24849e-08	1.41514e-06	1.15335e-06	8.64215e-07	1.0842e-05	4.27583e-06	2.68123e-06	1.37995e-05	5.68101e-06
EU	47	products of Vegetable oils and fats	p15.e																				3.91277e-07	8.84381e-07	7.7869e-07	2.05576e-07	6.03716e-07	1.91644e-06	1.25506e-06	3.01924e-06	4.57493e-06	1.47435e-06	2.9074e-07	2.49918e-06	2.09028e-07	1.94846e-07	4.33623e-06	1.06829e-06	2.57202e-06	9.04752e-06	3.82706e-06	4.55089e-06	5.23042e-06	5.80458e-05
EU	48	Dairy products	p15.f																				1.64e-06	6.0845e-06	4.851e-06	1.40709e-06	1.2528e-06	8.99262e-06	7.29908e-06	1.62497e-05	7.78749e-06	3.84657e-06	8.93931e-07	7.62363e-06	6.56711e-07	7.68145e-07	1.37936e-05	3.06111e-06	4.45564e-06	5.33666e-05	1.86719e-05	2.33303e-05	2.35241e-05	3.09162e-05
EU	49	Processed rice	p15.g																				8.62268e-08	1.55161e-07	1.35896e-07	4.23339e-08	1.8054e-07	2.05984e-07	3.19668e-07	5.95632e-07	4.16253e-07	2.3169e-07	9.36867e-08	5.97462e-07	2.81316e-08	4.263e-08	7.46228e-07	1.80095e-07	3.04973e-07	2.3921e-06	1.06816e-06	1.16973e-06	1.38607e-06	1.56272e-05
EU	50	Sugar	p15.h																				1.53065e-07	4.21555e-07	3.35709e-07	5.27609e-08	7.72624e-08	4.33017e-07	4.23924e-07	7.56874e-07	7.15603e-07	3.54118e-07	7.98947e-08	8.32808e-07	5.52501e-08	6.34552e-08	1.62104e-06	2.60494e-07	6.67164e-07	4.40456e-06	1.55235e-06	1.86833e-06	1.21529e-06	1.83217e-06
EU	51	Food products nec	p15.i																				4.5999e-06	7.52456e-06	6.4056e-06	2.91323e-06	4.86165e-06	3.57832e-05	1.15918e-05	3.58628e-05	3.05934e-05	1.11363e-05	2.76995e-06	1.60935e-05	4.0009e-06	2.04651e-06	2.72213e-05	6.37755e-06	6.35983e-06	9.87068e-05	3.79055e-05	3.73859e-05	5.01115e-05	0.000345276
EU	52	Beverages	p15.j																				5.69641e-06	1.73547e-05	1.44542e-05	7.05795e-06	5.73311e-06	0.000107854	1.74542e-05	6.52498e-05	4.10314e-05	7.76035e-06	2.33902e-06	2.5474e-05	1.54371e-05	1.89224e-06	0.000319354	8.05127e-06	6.24273e-06	0.000257684	6.86729e-05	5.13543e-05	6.34714e-05	0.000144579
EU	53	Fish products	p15.k																				7.43517e-07	6.33526e-07	8.63394e-07	4.42656e-07	2.17131e-06	1.01596e-06	2.08126e-06	5.3303e-06	4.62303e-06	1.19006e-06	2.47813e-07	4.3645e-06	2.00155e-07	2.041e-07	4.53666e-06	1.61188e-06	1.9656e-05	1.52268e-05	7.5498e-06	1.09472e-05	1.26458e-05	0.000202397
EU	54	Tobacco products (16)	p16																				3.42206e-07	1.74229e-07	1.3444e-07	2.57267e-07	1.09532e-06	2.56215e-05	1.60442e-05	3.87463e-05	1.9916e-06	7.38486e-07	3.05053e-07	5.41534e-07	5.3835e-08	7.05691e-08	1.24482e-06	8.54587e-07	9.34235e-07	4.17711e-06	1.37247e-06	2.72924e-06	3.25677e-06	2.02321e-06
EU	55	Textiles (17)	p17																				2.18674e-06	8.1098e-06	6.27733e-06	2.91491e-06	7.33102e-07	5.97876e-05	6.8567e-06	6.39684e-06	6.27895e-06	7.71772e-07	2.69401e-07	2.5255e-06	5.68075e-06	9.98917e-07	4.14031e-06	4.0778e-06	1.27728e-05	1.40919e-05	4.97271e-06	1.15523e-05	7.35757e-06	9.00129e-06
EU	56	Wearing apparel; furs (18)	p18																				1.56553e-06	3.0494e-06	2.54481e-06	1.36194e-06	3.19685e-07	2.67816e-05	2.5786e-06	4.0998e-06	5.84478e-06	8.68357e-07	5.87534e-07	3.05116e-06	1.53216e-06	2.97121e-07	2.98582e-06	1.39486e-06	6.06021e-06	1.02379e-05	3.64246e-06	9.64853e-06	1.62105e-05	6.60633e-06
EU	57	Leather and leather products (19)	p19																				3.55453e-07	1.37018e-06	1.1653e-06	1.16636e-07	9.88161e-08	2.32229e-06	8.46332e-07	4.16737e-07	1.42762e-06	6.32979e-08	3.5815e-08	2.40891e-07	5.43097e-08	3.98381e-08	3.4895e-07	6.65552e-07	5.47977e-07	9.46883e-07	5.50127e-07	8.61892e-07	7.32467e-07	1.18027e-06
EU	58	Wood and products of wood and cork (except furniture); articles of straw and plaiting materials (20)	p20																				0.000415227	5.71811e-05	7.38334e-05	5.40098e-05	0.000147029	9.98191e-05	0.000211075	0.000144364	6.98807e-05	6.09417e-06	1.60553e-06	1.15532e-05	7.98992e-06	6.04936e-06	2.49253e-05	3.29025e-05	1.62809e-05	0.000147928	4.74777e-05	0.000111686	5.87565e-05	7.43867e-05
EU	59	Wood material for treatment, Re-processing of secondary wood material into new wood material	p20.w																				0	0	0	0	0	0	0	0	0	0	0	0	0	0	0	0	0	0	0	0	0	0
EU	60	Pulp	p21.1																				4.78908e-05	8.24376e-05	7.08436e-05	2.68553e-05	2.69626e-05	0.000358617	0.000123782	0.000158261	0.000139636	2.68583e-05	8.48874e-06	1.7182e-05	7.64279e-06	5.53682e-06	0.000758905	2.20884e-05	3.58116e-05	0.000553482	0.000306858	0.000142508	8.43194e-05	7.22076e-05
EU	61	Secondary paper for treatment, Re-processing of secondary paper into new pulp	p21.w.1																				0	0	0	0	0	0	0	0	0	0	0	0	0	0	0	0	0	0	0	0	0	0
EU	62	Paper and paper products	p21.2																				2.04438e-05	3.12483e-05	2.47585e-05	1.9217e-05	8.41887e-06	7.67908e-05	4.43252e-05	0.000223966	7.52842e-05	8.38723e-06	1.96204e-06	1.42431e-05	6.57842e-06	5.4129e-06	4.90888e-05	1.61387e-05	2.10267e-05	0.000351368	7.03604e-05	0.000198271	0.000117198	9.69441e-05
EU	63	Printed matter and recorded media (22)	p22																				3.98937e-05	4.42115e-05	3.56547e-05	1.70672e-05	1.28037e-05	0.000167439	8.94931e-05	0.000103534	9.71797e-05	1.29696e-05	3.67782e-06	2.3919e-05	5.81936e-06	5.81607e-06	4.01086e-05	1.36002e-05	1.22531e-05	0.000356659	0.000328857	0.000196855	0.000226077	0.000112032
EU	64	Coke Oven Coke	p23.1.a																				6.09603e-05	0.000135432	0.000106717	9.94537e-06	3.01305e-05	0.000134459	0.000192961	0.000239629	0.000489084	0.000114612	0.000106941	2.18046e-05	1.00744e-05	2.10911e-05	0.000416917	0.000354184	0.000120083	0.00178735	0.000254032	0.000251627	0.000270421	0.000204467
EU	65	Gas Coke	p23.1.b																				0	0	0	0	0	0	0	0	0	0	0	0	0	0	0	0	0	0	0	0	0	0
EU	66	Coal Tar	p23.1.c																				2.67322e-05	3.36307e-05	1.2187e-05	2.00796e-06	6.17999e-06	3.97982e-05	8.96187e-05	4.45612e-05	1.7003e-05	5.62094e-06	2.84599e-06	2.53666e-05	1.52977e-06	2.85128e-06	8.70139e-06	4.04251e-05	9.91905e-06	0.000176913	2.68862e-05	6.38522e-05	1.94724e-05	2.02368e-05
EU	67	Motor Gasoline	p23.20.a																				3.5805e-05	0.000129272	8.49289e-05	6.28134e-05	1.87412e-05	9.38477e-05	0.000172929	0.00031792	0.00033946	0.000164247	2.66112e-05	0.00011878	6.07687e-06	4.23489e-05	0.000201579	0.000316569	0.000200496	0.00082757	0.000549581	0.000654974	0.00216584	0.000672762
EU	68	Aviation Gasoline	p23.20.b																				4.84147e-08	2.10182e-07	1.51335e-07	2.45268e-08	1.3994e-07	8.0428e-07	2.53619e-06	4.4392e-06	5.22711e-07	1.62987e-07	2.73815e-08	1.11923e-07	7.63286e-09	2.8057e-08	7.27753e-08	4.25403e-08	1.58738e-07	5.55332e-07	2.79436e-07	4.27029e-07	4.91798e-07	4.73348e-07
EU	69	Gasoline Type Jet Fuel	p23.20.c																				1.01741e-08	1.63613e-08	9.6458e-09	1.58299e-08	4.35452e-09	6.59354e-08	7.30599e-08	2.55878e-07	3.92783e-08	2.95896e-08	1.96361e-09	2.54538e-08	4.88196e-09	1.75319e-08	3.08723e-08	1.21046e-08	3.31587e-08	2.01522e-07	4.50925e-08	6.76394e-07	5.10766e-07	9.93408e-07
EU	70	Kerosene Type Jet Fuel	p23.20.d																				1.20365e-05	2.99919e-05	2.57197e-05	1.50831e-05	2.22303e-05	2.07705e-05	4.05027e-05	6.84953e-05	0.000108015	3.02747e-05	6.63038e-06	9.08276e-06	1.95417e-06	2.50962e-06	1.15466e-05	7.48343e-06	2.99795e-05	0.000126583	2.6474e-05	6.02432e-05	0.000427766	0.000204097
EU	71	Kerosene	p23.20.e																				1.07581e-05	2.57043e-06	1.53228e-06	2.31926e-06	1.84387e-06	7.18102e-06	5.26866e-05	0.000116858	1.38189e-05	4.12472e-06	1.67311e-06	9.92719e-06	2.24813e-06	2.91341e-06	9.3227e-06	0.000183423	4.7161e-05	7.17097e-05	2.03893e-05	8.20917e-05	4.46216e-05	4.26801e-05
EU	72	Gas/Diesel Oil	p23.20.f																				0.000124525	0.000438776	0.000294727	0.000105457	6.48096e-05	0.000197521	0.000294545	0.000311849	0.000539132	0.000178715	5.05563e-05	0.000117758	1.50069e-05	5.29429e-05	0.000456732	0.000196434	0.000817899	0.00199009	0.000964971	0.00179917	0.00344671	0.00177521
EU	73	Heavy Fuel Oil	p23.20.g																				4.4814e-05	3.51715e-05	2.53494e-05	9.72788e-05	2.01696e-05	6.00946e-05	0.000117493	0.000256734	0.000202816	5.21744e-05	8.51166e-05	7.65459e-05	2.56583e-05	4.55366e-05	0.000586152	0.000172466	0.000473431	0.00278121	0.00519798	0.000856835	0.00109652	0.00159118
EU	74	Refinery Gas	p23.20.h																				7.25945e-07	1.77663e-06	1.19733e-06	5.29204e-07	8.0895e-07	2.34806e-06	4.30745e-06	8.16229e-06	8.01756e-06	2.65096e-06	9.27602e-07	7.31765e-06	2.50336e-07	3.74432e-07	2.40653e-06	1.16536e-05	3.99397e-06	1.09208e-05	1.10085e-05	8.44995e-06	1.40828e-05	8.61773e-06
EU	75	Liquefied Petroleum Gases (LPG)	p23.20.i																				1.86984e-05	3.19515e-05	2.24253e-05	2.13495e-06	1.17629e-05	3.21619e-05	6.34752e-05	6.84698e-05	0.000167614	7.54118e-05	8.91991e-06	3.62132e-05	1.72455e-06	1.24077e-05	0.000419035	4.21005e-05	3.03131e-05	0.000322537	4.14519e-05	0.000398366	6.10458e-05	8.1129e-05
EU	76	Refinery Feedstocks	p23.20.j																				5.76125e-06	1.48067e-05	1.01578e-05	2.46366e-06	4.58212e-06	2.01795e-05	3.21646e-05	6.17333e-05	0.000206202	1.22695e-05	4.03922e-06	8.18781e-05	1.16116e-06	4.00327e-06	2.33389e-05	9.26076e-05	3.87398e-05	7.43774e-05	4.86372e-05	7.31577e-05	7.01395e-05	5.64697e-05
EU	77	Ethane	p23.20.k																				4.00949e-08	9.18752e-08	6.09145e-08	1.13875e-08	3.49575e-08	5.55958e-07	1.13854e-07	1.40106e-07	4.50021e-07	3.50886e-08	6.78232e-09	1.595e-07	7.00879e-09	6.86052e-08	7.50906e-08	2.08996e-07	6.09898e-08	3.28415e-07	2.42381e-07	2.05611e-07	1.19314e-07	1.69142e-07
EU	78	Naphtha	p23.20.l																				1.71162e-05	1.61755e-05	1.12342e-05	2.84462e-06	7.74315e-06	3.26428e-05	4.03462e-05	6.1545e-05	4.14758e-05	7.5474e-06	5.74926e-06	1.94249e-05	3.25915e-06	1.2592e-05	3.26604e-05	0.0034424	3.16028e-05	0.000191253	0.000140447	0.000103326	0.000746289	0.000124363
EU	79	White Spirit & SBP	p23.20.m																				7.77354e-06	1.22814e-05	1.04342e-05	2.01952e-06	3.34121e-05	4.26516e-05	0.000138461	0.000192702	1.04063e-05	5.69836e-06	2.60898e-06	1.69015e-05	7.26631e-07	1.0643e-06	9.15898e-06	1.50648e-05	3.29702e-05	5.75993e-05	4.52035e-05	5.3854e-05	0.000110523	0.000127864
EU	80	Lubricants	p23.20.n																				2.30112e-06	1.82557e-05	1.37064e-05	2.65453e-06	3.61065e-06	9.15725e-06	1.33725e-05	1.94225e-05	1.29241e-05	4.8537e-06	1.60244e-06	4.92283e-06	5.85799e-07	8.28833e-07	2.21958e-05	1.73164e-05	7.28809e-06	7.33639e-05	3.67297e-05	2.2901e-05	8.31184e-05	3.82115e-05
EU	81	Bitumen	p23.20.o																				3.26374e-06	6.01885e-05	9.80391e-05	1.30758e-05	0.000246439	0.000432796	0.00110738	0.00298632	5.58806e-05	3.93616e-05	2.59186e-06	0.000344894	8.61736e-06	6.11412e-06	2.32472e-05	6.12622e-05	2.50951e-05	7.98261e-05	5.2234e-05	5.39079e-05	9.09467e-05	5.13043e-05
EU	82	Paraffin Waxes	p23.20.p																				4.66072e-07	6.27822e-06	6.63721e-06	1.42473e-06	8.71153e-06	2.84703e-05	1.93447e-05	4.3964e-05	2.05391e-06	1.68198e-06	5.92357e-07	6.57817e-05	2.46701e-07	2.47337e-07	2.22312e-06	1.03347e-05	2.70637e-06	9.56382e-06	6.50433e-06	6.13366e-06	8.75466e-06	5.91152e-06
EU	83	Petroleum Coke	p23.20.q																				2.27458e-06	7.19271e-07	7.25799e-07	1.77349e-06	6.19185e-07	1.85978e-05	2.12312e-06	3.08565e-06	1.99223e-05	2.45396e-06	3.27492e-07	1.11788e-06	2.50733e-07	5.54825e-07	1.65084e-06	4.29363e-06	2.49452e-06	7.38338e-06	8.69009e-06	4.88318e-06	1.19041e-05	1.01919e-05
EU	84	Non-specified Petroleum Products	p23.20.r																				4.08062e-06	6.65377e-06	5.66987e-06	9.0264e-07	2.43054e-06	1.20416e-05	3.56673e-05	8.02621e-05	1.29836e-05	4.29711e-06	1.53364e-06	5.24912e-06	1.31631e-06	4.66871e-06	5.4457e-06	2.16892e-05	1.68797e-05	2.81311e-05	2.15787e-05	3.53194e-05	4.31713e-05	4.94145e-05
EU	85	Nuclear fuel	p23.3																				1.06796e-06	2.42599e-06	8.83979e-07	3.38299e-07	8.30075e-07	2.38067e-06	6.84437e-06	0.000332238	3.0264e-06	1.26824e-06	7.74325e-07	1.14375e-06	5.21982e-07	8.34656e-07	9.20301e-06	2.51133e-06	2.71678e-06	0.000318197	3.29598e-05	0.000123788	5.32191e-06	1.99097e-05
EU	86	Plastics, basic	p24.a																				0.000549226	0.000599868	0.000482634	0.000108357	0.000165986	0.000536575	0.000734836	0.000893234	0.000364949	9.79508e-05	0.000118504	7.35947e-05	0.000107292	1.8794e-05	0.000757176	0.000355704	0.00021139	0.0131988	0.00482364	0.0031789	0.000206808	0.000298922
EU	87	Secondary plastic for treatment, Re-processing of secondary plastic into new plastic	p24.a.w																				0	0	0	0	0	0	0	0	0	0	0	0	0	0	0	0	0	0	0	0	0	0
EU	88	N-fertiliser	p24.b																				2.58495e-05	4.5633e-05	3.03706e-05	4.35702e-06	1.23683e-06	4.66628e-05	0.000276521	0.000652396	1.67365e-05	1.08148e-05	6.57737e-07	3.48032e-06	8.44409e-07	1.64612e-06	2.98752e-06	1.94061e-05	1.61723e-05	1.19972e-05	1.08896e-05	2.01162e-05	6.71731e-06	7.70692e-06
EU	89	P- and other fertiliser	p24.c																				2.70949e-05	0.000121875	9.17629e-05	2.93079e-05	7.12845e-06	0.000625288	0.000207873	0.000424634	3.74349e-05	1.67887e-05	1.13074e-06	8.00448e-06	5.43033e-05	6.25812e-06	0.000120188	1.65496e-05	0.000121482	0.00068097	7.99147e-05	0.000277829	1.49856e-05	4.17846e-05
EU	90	Chemicals nec	p24.d																				9.00029e-05	0.000161458	0.000127509	1.14334e-05	9.01068e-06	6.49058e-05	0.000125264	0.000222151	0.000339394	4.23925e-05	1.57736e-05	0.000110983	5.21145e-06	2.33813e-05	9.18126e-05	0.000598519	0.000200375	0.000216467	0.000137111	0.000337561	0.000219925	0.00013683
EU	91	Charcoal	p24.e																				7.13498e-08	1.34514e-07	1.11495e-06	6.90838e-08	4.99359e-06	2.46214e-06	3.38229e-06	1.07332e-05	2.54728e-05	3.36279e-07	4.07466e-09	2.01888e-07	7.28774e-09	2.77443e-07	1.24206e-06	7.34374e-07	7.74411e-07	1.82838e-06	2.40908e-06	5.24801e-06	3.5211e-07	2.91676e-07
EU	92	Additives/Blending Components	p24.f																				2.6904e-05	9.15764e-05	7.28712e-05	2.601e-06	4.56595e-06	2.62394e-05	3.52557e-05	1.10986e-05	0.000449523	2.93952e-06	5.38126e-07	2.18449e-06	2.14354e-07	1.86306e-06	2.43368e-06	2.01624e-06	1.22397e-06	2.81366e-05	2.76788e-05	3.15158e-06	8.0099e-06	4.5588e-06
EU	93	Biogasoline	p24.g																				1.98421e-07	1.42518e-06	1.17006e-06	4.42977e-08	3.36154e-07	1.17607e-06	3.154e-07	6.46288e-07	1.12904e-06	2.43724e-07	5.55028e-08	4.05733e-07	7.44972e-08	3.45677e-07	1.06706e-06	5.69469e-07	4.42327e-07	7.77818e-06	2.3241e-06	6.75577e-06	2.00403e-06	1.46451e-06
EU	94	Biodiesels	p24.h																				6.2114e-06	3.30609e-06	2.89898e-06	2.97374e-07	5.35551e-06	5.5031e-06	1.48844e-05	3.96021e-05	0.000262316	4.11553e-06	1.30706e-06	4.12081e-06	2.63005e-07	3.20248e-06	0.000115046	1.74723e-06	2.14502e-06	4.34415e-05	1.0887e-05	2.46461e-05	1.03014e-05	1.96621e-05
EU	95	Other Liquid Biofuels	p24.i																				1.46775e-06	2.66519e-07	2.36722e-07	2.53338e-08	4.43843e-07	7.23344e-07	3.92639e-06	2.14133e-06	2.57899e-05	1.40965e-07	3.56302e-08	3.6579e-07	3.30663e-08	3.18755e-07	1.05133e-06	3.49398e-07	4.99588e-07	2.54793e-06	1.46535e-06	1.36808e-06	1.33198e-06	3.69968e-06
EU	96	Rubber and plastic products (25)	p25																				4.06772e-05	0.000144363	0.000109182	6.22917e-06	2.20534e-05	9.68328e-05	0.000393676	0.000584751	6.48517e-05	1.98241e-05	3.52386e-06	1.64673e-05	8.56734e-06	3.6414e-06	4.71519e-05	1.7703e-05	2.35155e-05	0.00025093	6.86232e-05	0.000158977	6.57478e-05	9.87278e-05
EU	97	Glass and glass products	p26.a																				0.000167761	0.000354935	0.000301945	2.57382e-05	0.000162642	0.00017292	0.00040447	0.00059283	0.000134235	3.57229e-05	6.82208e-06	2.67419e-05	2.07346e-05	1.05443e-05	0.000132652	6.69489e-05	7.15294e-05	0.000472434	0.000148313	0.00020664	0.000228188	0.000211845
EU	98	Secondary glass for treatment, Re-processing of secondary glass into new glass	p26.a.w																				0	0	0	0	0	0	0	0	0	0	0	0	0	0	0	0	0	0	0	0	0	0
EU	99	Ceramic goods	p26.b																				2.60014e-05	2.88597e-05	2.19058e-05	3.81676e-06	9.00675e-06	5.04486e-05	5.73181e-05	2.06543e-05	3.67442e-05	5.79137e-06	1.298e-06	1.07705e-05	1.11793e-05	4.36799e-06	2.34377e-05	8.86148e-06	8.87449e-06	0.000114023	4.10234e-05	3.65274e-05	4.91147e-05	0.000109445
EU	100	Bricks, tiles and construction products, in baked clay	p26.c																				2.6152e-05	2.35062e-05	1.86339e-05	2.18425e-05	8.57093e-06	7.82569e-05	6.01222e-05	3.79446e-05	3.46517e-05	3.21751e-06	1.48907e-06	9.57658e-06	2.13202e-06	2.67269e-06	0.000112833	7.37219e-06	6.43287e-06	0.00014084	4.30611e-05	3.4073e-05	0.000156881	9.16539e-05
EU	101	Cement, lime and plaster	p26.d																				0.000631645	0.0011232	0.000891146	0.00118671	0.000267775	0.00221602	0.00141984	0.000627235	0.000876014	9.04587e-05	3.42429e-05	0.00010065	4.59438e-05	0.000165465	0.00215829	0.000204052	0.000104365	0.00885687	0.00105789	0.000675899	0.00429206	0.00415679
EU	102	Ash for treatment, Re-processing of ash into clinker	p26.d.w																				0	0	0	0	0	0	0	0	0	0	0	0	0	0	0	0	0	0	0	0	0	0
EU	103	Other non-metallic mineral products	p26.e																				9.34528e-05	8.26837e-05	5.90735e-05	0.000259456	3.13374e-05	0.000129218	0.000172793	0.000137462	0.000143087	6.54946e-05	8.17995e-06	3.02465e-05	1.65091e-05	8.22053e-06	0.000228367	5.01607e-05	5.55972e-05	0.000900601	0.00017986	0.000336432	0.000988834	0.000682493
EU	104	Basic iron and steel and of ferro-alloys and first products thereof	p27.a																				0.00102605	0.00180667	0.00140734	0.000136994	0.000340838	0.00257381	0.00221946	0.00101466	0.00327645	0.000497147	7.49251e-05	0.000110928	0.000151281	4.22698e-05	0.00577341	0.000333184	0.000819894	0.0270277	0.00276892	0.00269005	0.000524543	0.000600362
EU	105	Secondary steel for treatment, Re-processing of secondary steel into new steel	p27.a.w																				0	0	0	0	0	0	0	0	0	0	0	0	0	0	0	0	0	0	0	0	0	0
EU	106	Precious metals	p27.41																				1.40053e-05	7.50868e-05	4.56207e-05	1.22457e-06	6.96672e-06	1.30044e-05	3.61642e-05	3.19132e-05	5.98172e-05	3.64441e-06	1.81675e-06	4.29542e-06	1.4127e-06	9.1338e-07	0.000699312	1.16847e-05	7.45925e-06	0.00323505	0.000300993	0.000140366	1.88476e-05	1.93607e-05
EU	107	Secondary preciuos metals for treatment, Re-processing of secondary preciuos metals into new preciuos metals	p27.41.w																				0	0	0	0	0	0	0	0	0	0	0	0	0	0	0	0	0	0	0	0	0	0
EU	108	Aluminium and aluminium products	p27.42																				0.00012919	0.000253966	0.000205193	1.71313e-05	4.91907e-05	0.00025556	0.000337515	0.000361577	0.000365905	9.65285e-05	1.18136e-05	2.06805e-05	3.02802e-05	6.58519e-06	0.000759945	7.95245e-05	4.11755e-05	0.00360015	0.000401501	0.000333518	0.000102802	0.000113189
EU	109	Secondary aluminium for treatment, Re-processing of secondary aluminium into new aluminium	p27.42.w																				0	0	0	0	0	0	0	0	0	0	0	0	0	0	0	0	0	0	0	0	0	0
EU	110	Lead, zinc and tin and products thereof	p27.43																				1.17204e-05	5.74746e-05	2.76835e-05	1.11208e-06	4.67819e-06	2.21396e-05	2.71854e-05	2.68337e-05	1.90962e-05	7.98751e-06	1.16878e-06	3.14916e-06	6.35536e-06	1.01204e-06	0.000608651	1.39084e-05	5.44216e-06	0.00315877	0.00024769	0.000293705	2.8786e-05	3.36592e-05
EU	111	Secondary lead for treatment, Re-processing of secondary lead into new lead	p27.43.w																				0	0	0	0	0	0	0	0	0	0	0	0	0	0	0	0	0	0	0	0	0	0
EU	112	Copper products	p27.44																				6.2957e-05	0.00014122	9.13751e-05	5.91489e-06	2.25066e-05	0.000112217	0.000138865	5.76769e-05	0.000121323	2.09467e-05	4.53442e-06	8.91177e-06	1.07861e-05	5.47681e-06	0.00106222	2.07008e-05	6.1e-05	0.00507776	0.000452727	0.00094296	5.52491e-05	6.58932e-05
EU	113	Secondary copper for treatment, Re-processing of secondary copper into new copper	p27.44.w																				0	0	0	0	0	0	0	0	0	0	0	0	0	0	0	0	0	0	0	0	0	0
EU	114	Other non-ferrous metal products	p27.45																				7.74379e-06	1.14376e-05	7.88701e-06	8.23543e-07	3.73603e-06	1.10945e-05	2.29184e-05	2.63785e-05	2.44e-05	5.08952e-06	1.32353e-06	1.65147e-06	1.1895e-06	6.98822e-07	7.9706e-05	4.62371e-06	3.17239e-06	0.000373008	4.08951e-05	4.26325e-05	8.37532e-06	1.06591e-05
EU	115	Secondary other non-ferrous metals for treatment, Re-processing of secondary other non-ferrous metals into new other non-ferrous metals	p27.45.w																				0	0	0	0	0	0	0	0	0	0	0	0	0	0	0	0	0	0	0	0	0	0
EU	116	Foundry work services	p27.5																				0.000265991	0.000156954	0.000105532	1.36734e-05	0.000101781	0.00023816	0.000586699	0.00017034	0.00135854	0.00012566	4.62957e-05	1.93768e-05	1.64663e-05	1.28634e-05	0.000181967	4.63094e-05	4.3854e-05	0.000823579	0.00019738	0.000301375	0.000146739	0.000164632
EU	117	Fabricated metal products, except machinery and equipment (28)	p28																				0.00016547	0.000461814	0.00038959	2.25522e-05	0.000112342	0.000343952	0.000546728	0.000688655	0.000438392	4.13434e-05	8.80266e-06	2.54163e-05	9.21051e-05	6.88235e-06	0.000146634	3.98459e-05	4.39946e-05	0.000557047	0.000132489	0.000249021	0.000115576	0.000108649
EU	118	Machinery and equipment n.e.c. (29)	p29																				3.14985e-05	6.71991e-05	3.80137e-05	7.31342e-06	5.44441e-05	0.000130555	0.000249852	0.00039068	0.00015773	3.01476e-05	1.1543e-05	9.73979e-06	8.93141e-06	2.77917e-06	3.43528e-05	2.71676e-05	4.57699e-05	0.000121074	5.47856e-05	0.000242074	0.00019401	0.000213803
EU	119	Office machinery and computers (30)	p30																				1.61959e-06	4.39639e-06	5.20336e-06	7.64187e-07	9.8441e-06	1.28506e-05	4.87387e-06	6.71437e-06	1.48193e-05	2.38927e-06	7.83904e-07	1.12386e-06	4.63621e-07	1.51058e-07	2.60217e-06	1.4607e-06	1.07477e-06	0.000129829	6.02606e-06	5.76105e-06	8.77643e-06	5.8639e-06
EU	120	Electrical machinery and apparatus n.e.c. (31)	p31																				0.00120126	0.000533236	0.000458314	3.62026e-05	0.000349939	0.000881918	0.00246706	0.000162003	0.0013987	6.99462e-05	2.1469e-05	7.66419e-05	2.19284e-05	1.64382e-05	0.00022202	5.31197e-05	0.000103211	0.000945729	0.000319542	0.000632603	0.000217526	0.000256668
EU	121	Radio, television and communication equipment and apparatus (32)	p32																				2.01416e-05	4.12183e-05	3.54075e-05	8.47702e-06	1.31394e-05	0.000148176	6.25289e-05	0.000104965	0.000110452	5.63984e-06	2.35803e-06	2.81135e-05	8.6859e-06	7.50684e-06	1.87172e-05	7.66758e-06	6.39843e-06	0.000171621	5.84879e-05	0.000119229	4.94583e-05	3.66349e-05
EU	122	Medical, precision and optical instruments, watches and clocks (33)	p33																				2.81409e-05	4.07837e-05	4.9299e-05	9.74126e-06	8.49946e-05	2.0469e-05	0.000205314	0.00037913	4.53257e-05	1.03468e-05	2.77679e-06	6.07347e-06	1.29797e-06	2.2111e-06	2.01075e-05	7.99159e-06	6.21383e-06	0.00033436	0.000939916	4.27829e-05	0.000117174	5.54705e-05
EU	123	Motor vehicles, trailers and semi-trailers (34)	p34																				8.75035e-06	1.49756e-05	1.25908e-05	1.45344e-06	1.39739e-05	2.80465e-05	3.62819e-05	4.52403e-05	4.11763e-05	9.89983e-06	1.84039e-06	6.83084e-06	2.72502e-06	1.24849e-06	1.37941e-05	5.70666e-06	9.14106e-06	5.88495e-05	2.35108e-05	3.84168e-05	3.9899e-05	2.57115e-05
EU	124	Other transport equipment (35)	p35																				3.50733e-05	2.50413e-05	2.13731e-05	6.3781e-06	4.88172e-06	3.72635e-05	2.05762e-05	3.11926e-05	3.25166e-05	6.87454e-06	1.21963e-06	5.42563e-06	5.89231e-06	3.07464e-06	2.99799e-05	3.36856e-05	1.61102e-05	0.000284405	3.40991e-05	0.000110519	3.60231e-05	4.778e-05
EU	125	Furniture; other manufactured goods n.e.c. (36)	p36																				1.22721e-05	6.02917e-05	5.0044e-05	3.79318e-06	2.29434e-06	2.18776e-05	1.71219e-05	2.22475e-05	1.88864e-05	3.8268e-06	1.49008e-06	7.15114e-06	4.25686e-06	1.51092e-06	2.65594e-05	1.48181e-05	9.40615e-06	0.00016863	2.57423e-05	5.96269e-05	5.3341e-05	4.53961e-05
EU	126	Secondary raw materials	p37																				0.000122906	0.000927674	0.00076455	1.26993e-05	4.1259e-05	0.000181171	0.000275643	0.000202477	0.000258133	8.07324e-05	2.18762e-05	5.37369e-05	2.54549e-05	9.94859e-06	0.00296928	6.49477e-05	8.54123e-05	0.0104017	0.00134439	0.000487892	0.000129104	0.000177419
EU	127	Bottles for treatment, Recycling of bottles by direct reuse	p37.w.1																				0	0	0	0	0	0	0	0	0	0	0	0	0	0	0	0	0	0	0	0	0	0
EU	128	Electricity by coal	p40.11.a																				0.0323264	0.00325397	0.00319875	0.00253489	0.00780911	0.0172359	0.0606769	0.0082703	0.01367	0.0166003	0.00566557	0.000733746	0.00949038	0.000139388	0.00135769	0.00131217	0.000951427	0.00879781	0.00438303	0.00495376	0.051113	0.0212397
EU	129	Electricity by gas	p40.11.b																				0.00182372	0.000201043	0.000456537	0.000499345	0.00189259	0.000378452	0.00262368	0.00426511	0.00127717	0.00758081	0.00257357	8.80787e-05	0.000589677	1.79291e-05	0.00023882	0.000287116	0.000243742	0.00357494	0.00129232	0.00283429	0.00499578	0.00541179
EU	130	Electricity by nuclear	p40.11.c																				1.83509e-05	1.72416e-05	5.29525e-06	1.00904e-06	5.01597e-06	2.46167e-05	7.98625e-05	6.04476e-05	1.35031e-05	7.66238e-05	2.60267e-05	4.03574e-06	9.45172e-07	1.594e-06	2.65855e-06	5.80385e-06	1.22307e-06	1.83783e-05	1.46197e-05	1.91338e-05	1.97241e-05	1.60627e-05
EU	131	Electricity by hydro	p40.11.d																				8.00551e-06	0.000172536	0.000146201	3.45418e-06	1.81541e-06	2.85607e-05	1.11411e-05	1.49832e-05	8.60802e-06	4.27656e-06	1.37244e-06	5.4326e-06	2.08165e-06	9.06131e-07	5.74712e-06	2.42471e-06	2.2115e-06	5.33766e-05	3.80971e-05	3.78496e-05	0.000112331	6.34737e-05
EU	132	Electricity by wind	p40.11.e																				0.000126737	0.00227825	0.00187753	1.97575e-05	1.52389e-05	0.00036237	0.000171729	5.98366e-05	0.000137892	0.000360412	0.000122825	3.23892e-05	4.22145e-05	1.11132e-05	3.54635e-05	6.01602e-05	2.34714e-05	0.000264801	0.00010452	0.000503416	0.000371465	0.000320142
EU	133	Electricity by petroleum and other oil derivatives	p40.11.f																				0.00104675	8.67372e-05	8.57408e-05	0.000195117	8.61263e-05	0.000194729	0.000447927	0.000289261	0.000270146	3.4142e-05	5.53698e-06	3.11571e-05	0.000319437	3.64224e-06	9.64336e-05	0.000117635	9.16419e-05	0.00279541	0.000156114	0.000322485	0.00250128	0.0015102
EU	134	Electricity by biomass and waste	p40.11.g																				0.00069108	0.000149231	0.00014142	2.74522e-05	0.000186325	0.000162674	0.00140866	0.000130317	0.000294693	0.000110305	3.83175e-05	1.08615e-05	0.000102723	3.47354e-06	2.8019e-05	1.89094e-05	1.75795e-05	0.000148644	0.000110127	0.000280442	0.000798078	0.000345342
EU	135	Electricity by solar photovoltaic	p40.11.h																				0.000264475	1.55882e-05	1.62447e-05	6.43322e-07	7.51283e-05	3.82699e-05	0.000544173	1.28844e-05	9.93054e-05	1.42033e-05	5.44438e-06	1.35901e-06	9.26975e-07	1.43681e-06	1.10936e-05	6.63602e-06	2.91709e-06	3.29501e-05	2.04519e-05	1.91471e-05	9.25965e-06	1.80457e-05
EU	136	Electricity by solar thermal	p40.11.i																				8.94632e-06	1.34369e-07	1.59662e-07	1.27858e-06	1.13128e-07	2.47468e-07	5.42704e-07	7.02275e-07	4.73309e-06	2.09924e-07	6.17408e-08	6.72753e-08	3.3221e-06	1.65037e-08	3.31823e-07	1.91692e-06	9.78964e-07	8.31385e-06	1.17324e-05	2.53676e-06	5.91319e-07	2.9667e-06
EU	137	Electricity by tide, wave, ocean	p40.11.j																				9.42148e-08	2.11304e-07	8.058e-08	3.00606e-08	9.00404e-06	1.08175e-07	6.32059e-07	1.34114e-06	1.40486e-05	4.41015e-07	1.5886e-07	1.16794e-07	1.52182e-08	2.88524e-08	3.25417e-07	3.4251e-06	1.16186e-06	1.71154e-06	0.00011284	5.68851e-05	1.18784e-06	7.89833e-07
EU	138	Electricity by Geothermal	p40.11.k																				1.20397e-05	2.49468e-07	5.80038e-07	2.2884e-08	3.25639e-06	1.13318e-06	2.42425e-05	3.90002e-07	2.70451e-05	1.46758e-07	6.18443e-08	1.71574e-07	2.79348e-08	4.84227e-07	2.51279e-07	2.43992e-07	1.55741e-07	1.18587e-06	2.292e-06	6.81793e-07	4.57874e-07	1.14285e-06
EU	139	Electricity nec	p40.11.l																				0.000340604	1.81738e-05	2.22624e-05	8.63785e-06	9.33955e-05	5.69654e-05	0.000609047	3.19832e-05	0.000115292	1.79992e-05	6.74726e-06	5.32179e-06	5.21503e-05	1.41233e-06	1.4993e-05	1.39727e-05	1.38432e-05	0.000115582	7.78834e-05	7.83114e-05	3.04811e-05	5.28091e-05
EU	140	Transmission services of electricity	p40.12																				0.00101964	0.000117384	0.000116629	1.03171e-05	0.000277315	0.000126271	0.00207738	7.5343e-05	0.000410935	0.00132653	0.000456192	1.79528e-05	1.24778e-05	3.95507e-06	3.24446e-05	2.13196e-05	1.41474e-05	0.000156771	0.000110141	0.000103759	0.000307475	0.000188999
EU	141	Distribution and trade services of electricity	p40.13																				0.000180253	8.46372e-05	6.13028e-05	4.36915e-06	5.24313e-05	5.18238e-05	0.000392105	6.24062e-05	0.000105883	0.000237289	8.15662e-05	1.54416e-05	6.10472e-06	2.3992e-06	2.2534e-05	1.68627e-05	1.69652e-05	0.000141143	0.000125716	0.000123651	0.000120183	8.76313e-05
EU	142	Coke oven gas	p40.2.a																				2.251e-06	3.00433e-06	1.97421e-06	1.38652e-07	7.35972e-07	2.53656e-06	8.37174e-06	8.80186e-06	5.60754e-06	1.20315e-06	3.08356e-07	3.26239e-07	1.4578e-07	5.731e-07	3.13133e-06	8.85193e-07	7.22328e-07	1.27104e-05	3.04484e-06	1.1605e-05	4.37604e-06	1.23857e-05
EU	143	Blast Furnace Gas	p40.2.b																				8.44732e-06	2.53336e-06	2.08659e-06	2.95086e-07	2.48686e-06	3.71275e-06	1.8152e-05	5.92622e-06	1.11559e-05	3.64474e-06	1.13233e-06	9.41127e-07	3.52328e-07	1.50852e-06	5.03563e-06	1.23282e-06	1.18173e-06	2.04831e-05	5.65424e-06	2.59248e-05	1.4295e-05	4.66342e-05
EU	144	Oxygen Steel Furnace Gas	p40.2.c																				2.472e-07	2.24614e-07	1.23094e-07	7.98901e-09	7.80989e-08	2.60308e-07	6.50775e-07	1.44273e-07	8.22544e-07	6.65956e-08	3.63595e-08	1.73131e-08	1.43782e-08	1.50276e-08	2.09829e-07	1.25647e-07	6.8468e-08	8.37368e-07	1.71178e-07	3.34331e-07	9.10995e-08	9.18238e-08
EU	145	Gas Works Gas	p40.2.d																				4.42815e-08	7.8999e-07	2.06346e-07	2.65002e-09	1.50056e-08	9.95293e-07	1.07864e-06	6.86456e-08	6.88112e-07	2.79584e-07	2.49598e-09	4.09652e-08	3.57508e-09	4.85703e-08	5.69739e-08	1.66913e-07	1.56302e-08	1.52559e-07	5.07351e-08	1.68018e-07	2.35993e-07	7.16888e-08
EU	146	Biogas	p40.2.e																				0.000148465	4.9214e-06	8.00311e-06	6.41265e-07	4.03391e-05	1.76156e-05	0.000300849	7.79289e-06	7.87073e-05	3.43239e-06	1.3558e-06	1.55353e-06	6.38069e-07	1.07844e-06	4.36861e-06	2.90901e-06	2.11686e-06	2.23226e-05	1.55455e-05	1.87785e-05	1.51733e-05	3.20746e-05
EU	147	Distribution services of gaseous fuels through mains	p40.2.1																				0.000274688	4.51946e-05	3.54368e-05	2.2513e-05	8.43007e-05	9.81228e-05	0.000508596	0.000152772	0.00334793	4.60283e-05	1.6273e-05	2.70709e-05	4.7692e-05	2.05278e-05	7.95982e-05	7.10417e-05	6.67108e-05	0.000518281	0.000432421	0.000426182	0.000451943	0.000671622
EU	148	Steam and hot water supply services	p40.3																				0.00121166	0.0076936	0.00616831	8.40618e-05	0.000360688	0.00325849	0.00334126	0.000370961	0.00275999	0.000994184	0.000328295	0.00167459	0.000184678	0.000148219	0.00034193	0.000664354	0.000109969	0.000820535	0.000426032	0.000702542	0.000860734	0.000995228
EU	149	Collected and purified water, distribution services of water (41)	p41																				0.000141416	0.000638809	0.000542206	1.68308e-06	4.04754e-05	8.20891e-05	0.000298247	3.46834e-05	5.87547e-05	2.90626e-05	1.56163e-05	2.76978e-05	1.55573e-06	2.99503e-06	4.51533e-05	1.24307e-05	1.09086e-05	0.000196678	0.000136955	5.06795e-05	2.84628e-05	3.9736e-05
EU	150	Construction work (45)	p45																				0.000760355	0.000169574	0.000123434	2.51335e-05	0.000221749	0.000497693	0.00164612	0.000128823	0.000715714	5.67186e-05	2.12242e-05	2.13038e-05	8.28218e-06	1.78827e-05	8.74615e-05	7.48584e-05	3.32422e-05	0.000530195	0.000385675	0.000190936	0.00028715	0.00023411
EU	151	Secondary construction material for treatment, Re-processing of secondary construction material into aggregates	p45.w																				0	0	0	0	0	0	0	0	0	0	0	0	0	0	0	0	0	0	0	0	0	0
EU	152	Sale, maintenance, repair of motor vehicles, motor vehicles parts, motorcycles, motor cycles parts and accessoiries	p50.a																				0.00011265	5.63741e-05	4.01681e-05	9.59947e-06	6.67377e-05	0.000134291	0.000431582	0.000439184	0.00041809	0.000104536	3.6055e-05	0.000112903	4.44952e-05	8.75125e-06	5.59914e-05	4.64539e-05	1.55361e-05	0.000369174	0.000196597	0.000210003	0.000243819	0.000349235
EU	153	Retail trade services of motor fuel	p50.b																				1.76731e-05	6.28194e-05	5.7709e-05	5.52638e-06	0.000145356	7.41063e-05	0.000147913	0.000165124	0.000136953	6.86772e-06	6.07969e-06	3.19869e-05	7.85828e-06	7.99646e-06	3.50679e-05	3.99746e-05	3.34998e-05	0.000209975	0.000241244	6.98514e-05	9.57422e-05	0.000307345
EU	154	Wholesale trade and commission trade services, except of motor vehicles and motorcycles (51)	p51																				0.000185295	9.1369e-05	5.15243e-05	3.68469e-05	0.000141355	0.000248298	0.000591001	0.000518426	0.000261311	5.90747e-05	9.93294e-05	0.000137825	6.56463e-05	2.87948e-05	0.000913257	9.18868e-05	4.07507e-05	0.00142385	0.000403797	0.000696771	0.00101239	0.00110783
EU	155	Retail trade services, except of motor vehicles and motorcycles; repair services of personal and household goods (52)	p52																				6.7994e-05	1.72486e-05	1.60896e-05	0.000338416	6.85922e-05	0.000245385	0.00187639	0.0043276	0.000190832	5.40446e-05	2.64135e-05	0.00194224	9.49201e-05	1.51115e-05	0.00133985	3.99015e-05	1.4258e-05	0.00371773	0.000499049	0.000492539	0.00337486	0.00285712
EU	156	Hotel and restaurant services (55)	p55																				1.72944e-05	4.0575e-05	3.14936e-05	6.29332e-06	1.83797e-05	7.37852e-05	5.08032e-05	4.87615e-05	6.49643e-05	4.36205e-05	1.1295e-05	8.99517e-05	6.27999e-06	8.12018e-06	0.000165487	1.34181e-05	1.18242e-05	0.00053156	0.000220093	0.000145537	0.000120873	0.000188455
EU	157	Railway transportation services	p60.1																				0.000100902	0.000430745	0.000295827	0.000122598	0.000160363	0.0019653	0.000907859	0.00170152	0.000538634	7.21056e-05	2.20069e-05	0.000179986	0.000191228	2.40288e-05	0.000242287	0.000667516	0.000232866	0.00345246	0.00185806	0.00140318	0.00145803	0.00190531
EU	158	Other land transportation services	p60.2																				5.2496e-05	0.000196372	8.34054e-05	0.000205002	2.97023e-05	0.000245702	0.000348917	0.000372355	0.000147223	8.57761e-05	2.68232e-05	8.50412e-05	1.66406e-05	1.99491e-05	0.0001916	0.000183632	4.63281e-05	0.0012458	0.000233967	0.000509359	0.0074052	0.00240848
EU	159	Transportation services via pipelines	p60.3																				0.000263874	0.0014105	0.00103077	0.000615105	0.000910407	0.00109734	0.00743605	0.0176066	0.0106287	0.0015336	0.00110394	0.000585399	1.69429e-05	0.000153425	0.00467674	0.00768431	0.000536899	0.0410863	0.0903285	0.00121625	0.000793169	0.000910024
EU	160	Sea and coastal water transportation services	p61.1																				0.00137656	0.000363371	0.000268593	0.000168316	0.000601167	0.00102808	0.00307555	0.00181772	0.00653217	0.00116779	0.000323402	0.00698399	9.67896e-05	0.000225473	0.00109863	0.00255169	0.000949917	0.00686491	0.00414733	0.00455206	0.00580741	0.0096186
EU	161	Inland water transportation services	p61.2																				9.86639e-05	3.68669e-05	1.81962e-05	0.000139988	4.98857e-05	0.000420359	0.000279797	0.000251547	0.00119127	0.000333095	8.80776e-05	0.000284398	0.000485813	3.3494e-05	0.0115935	8.56577e-05	8.94858e-05	0.00421676	0.00199179	0.000321164	0.00479891	0.016631
EU	162	Air transport services (62)	p62																				0.000305848	0.000311358	0.000236096	0.00292191	0.000320716	0.000922643	0.00162697	0.0054356	0.00182228	0.000764936	0.000118887	0.000656207	9.13885e-05	0.000105965	0.000886901	0.000240142	0.000826902	0.0139952	0.00162384	0.0055797	0.0964244	0.0351585
EU	163	Supporting and auxiliary transport services; travel agency services (63)	p63																				0.000184877	0.000457452	0.00021546	9.41829e-05	6.3374e-05	0.000933917	0.000803414	0.00106889	0.000599749	9.3453e-05	2.41115e-05	0.000240593	6.20998e-05	2.63976e-05	0.000448298	0.000170729	0.000169074	0.00381915	0.000837972	0.00199402	0.00265598	0.00188417
EU	164	Post and telecommunication services (64)	p64																				3.75914e-05	0.000910788	0.000766685	2.38996e-05	1.66252e-05	0.000125985	8.70537e-05	9.10341e-05	0.000146096	2.62919e-05	1.32397e-05	3.54027e-05	9.15681e-06	8.08022e-06	0.000864407	3.61835e-05	2.06796e-05	0.00435735	0.000546755	0.00020747	0.000224311	0.000131849
EU	165	Financial intermediation services, except insurance and pension funding services (65)	p65																				2.62667e-05	8.7166e-05	6.45441e-05	7.69332e-06	2.51719e-05	0.00014577	8.01694e-05	6.39548e-05	0.000147823	3.86162e-05	1.26686e-05	1.68543e-05	1.38582e-05	2.35631e-06	4.77383e-05	2.11556e-05	0.000117996	0.000212841	0.00265716	9.16394e-05	6.43271e-05	7.45192e-05
EU	166	Insurance and pension funding services, except compulsory social security services (66)	p66																				1.07957e-05	5.90066e-05	4.87079e-05	3.708e-06	5.27153e-06	4.98703e-05	2.98985e-05	2.92313e-05	0.000180643	7.87608e-06	2.72788e-06	7.86368e-06	2.79757e-06	1.43271e-06	1.89897e-05	6.26783e-06	1.48943e-05	7.80439e-05	5.50586e-05	4.88896e-05	6.22715e-05	7.53154e-05
EU	167	Services auxiliary to financial intermediation (67)	p67																				7.43452e-06	1.05855e-05	8.22016e-06	2.00448e-06	5.036e-06	1.38696e-05	1.94431e-05	0.000102105	3.27962e-05	6.43046e-06	1.92461e-06	9.9275e-06	1.40902e-06	1.52115e-06	2.5482e-05	4.67296e-06	1.73741e-05	0.000138254	0.000375408	8.11858e-05	2.89129e-05	3.32918e-05
EU	168	Real estate services (70)	p70																				5.50009e-05	8.15922e-05	6.09215e-05	7.27621e-06	1.88314e-05	0.000168785	0.00017275	0.000163755	0.000192593	1.94298e-05	7.46448e-06	2.18305e-05	4.50766e-06	4.96911e-06	6.64787e-05	2.14333e-05	1.40653e-05	0.000302707	0.000131217	0.000113478	9.60878e-05	9.54312e-05
EU	169	Renting services of machinery and equipment without operator and of personal and household goods (71)	p71																				0.000128613	0.000308944	0.000246214	1.38212e-05	7.36099e-05	0.000655525	0.000254018	0.000612266	0.00109932	0.000298802	7.51838e-05	0.000147553	3.46351e-05	2.08582e-05	0.000549969	0.000108276	4.37092e-05	0.00186374	0.000537187	0.000905271	0.000411366	0.000508128
EU	170	Computer and related services (72)	p72																				5.42983e-05	0.000155565	0.000129222	7.48467e-06	4.78581e-05	0.000101831	0.000132958	0.00010923	0.000405563	6.35446e-05	2.18449e-05	0.000104981	1.28427e-05	7.58378e-06	6.5802e-05	2.35718e-05	1.65288e-05	0.000432555	0.000192374	0.000206595	0.000146583	0.000118988
EU	171	Research and development services (73)	p73																				3.70656e-05	2.14875e-05	1.73703e-05	5.22642e-06	8.56795e-06	6.074e-05	3.83604e-05	6.18602e-05	7.49119e-05	1.34878e-05	4.102e-06	3.07384e-05	1.26906e-05	1.08168e-05	3.37731e-05	2.04045e-05	1.30253e-05	0.00228662	0.000185114	0.00150982	3.70069e-05	6.97217e-05
EU	172	Other business services (74)	p74																				0.000563195	0.000531386	0.000387237	0.000140758	0.000215508	0.00128178	0.00137252	0.0010513	0.0031688	0.000399143	0.00014453	0.000334984	0.000137811	5.12063e-05	0.000457722	0.000225732	0.000165652	0.0031558	0.00168298	0.00127724	0.00248991	0.00147894
EU	173	Public administration and defence services; compulsory social security services (75)	p75																				1.33655e-05	1.11232e-05	1.01333e-05	4.96173e-07	6.10343e-06	7.47444e-06	2.80844e-05	5.38255e-06	6.82882e-05	3.25179e-06	1.13416e-06	3.32362e-06	2.75365e-07	2.36496e-07	2.13693e-06	1.42827e-06	1.22922e-06	1.70325e-05	1.11178e-05	6.8467e-06	1.08624e-05	7.61014e-06
EU	174	Education services (80)	p80																				1.7948e-06	1.15282e-06	9.19384e-07	1.32828e-06	1.42045e-07	2.35884e-05	1.27642e-06	1.74067e-06	5.36978e-06	1.67502e-06	5.79983e-07	1.22393e-06	4.25681e-06	5.46435e-08	6.79467e-07	1.81415e-06	6.38918e-07	9.06273e-06	1.77049e-06	5.89102e-06	1.66684e-06	1.80408e-06
EU	175	Health and social work services (85)	p85																				5.74967e-08	1.75675e-07	1.43697e-07	3.01361e-07	4.71776e-08	6.34632e-06	1.90463e-07	4.78257e-07	2.38954e-06	7.85376e-07	3.04213e-07	4.0218e-07	1.8813e-06	1.04399e-07	2.65037e-07	1.08116e-07	6.81242e-08	2.61621e-06	1.81115e-06	9.66697e-07	5.26583e-07	3.72989e-07
EU	176	Food waste for treatment: incineration	p90.1.a																				1.11967e-05	3.24098e-06	2.4158e-06	1.6877e-07	3.40152e-06	3.61243e-06	2.473e-05	2.25374e-05	5.91174e-06	4.31114e-06	1.22834e-06	8.33546e-05	2.03427e-07	1.5604e-06	3.525e-05	2.21436e-06	1.98319e-06	0.000281682	6.2226e-05	5.89069e-05	5.00682e-06	5.68711e-06
EU	177	Paper waste for treatment: incineration	p90.1.b																				1.22415e-05	3.35731e-06	2.5198e-06	1.59956e-07	3.65216e-06	3.67303e-06	2.63595e-05	1.76763e-05	5.96281e-06	4.06127e-06	1.15926e-06	7.29295e-05	2.06492e-07	1.46922e-06	3.06428e-05	6.78264e-06	1.99314e-06	0.000256742	6.27664e-05	5.39273e-05	4.59213e-06	5.40932e-06
EU	178	Plastic waste for treatment: incineration	p90.1.c																				2.03514e-05	2.10813e-05	1.52529e-05	1.12416e-06	7.28125e-06	1.36251e-05	4.68337e-05	8.95702e-05	3.91672e-05	3.83248e-05	1.15261e-05	0.00104135	1.40443e-06	5.11144e-06	0.000127218	5.47616e-05	1.02318e-05	0.000988758	0.000182725	0.000258525	2.55985e-05	3.56858e-05
EU	179	Intert/metal waste for treatment: incineration	p90.1.d																				6.30056e-05	0.000105308	8.59093e-05	4.44708e-06	3.0423e-05	5.38681e-05	0.000146224	0.000373343	8.21263e-05	6.38906e-05	1.86058e-05	0.000295857	7.53378e-06	5.67059e-05	0.000882092	4.03629e-05	2.44216e-05	0.00967895	0.00253653	0.00115108	0.000157185	0.000178305
EU	180	Textiles waste for treatment: incineration	p90.1.e																				6.47123e-06	6.64122e-06	4.72204e-06	6.06755e-07	3.51199e-06	6.21695e-06	1.73331e-05	6.85283e-05	2.48591e-05	2.0876e-05	6.41102e-06	0.00112419	6.85219e-07	3.91878e-06	0.000103907	6.05636e-06	4.55495e-06	0.000571681	0.000156043	7.10011e-05	1.49043e-05	1.46426e-05
EU	181	Wood waste for treatment: incineration	p90.1.f																				7.52992e-06	3.66824e-06	3.11017e-06	7.37444e-08	2.24268e-06	1.69991e-06	1.58558e-05	1.02034e-05	3.16372e-06	1.66138e-06	4.63845e-07	2.20148e-05	8.57043e-08	1.12707e-06	2.23075e-05	1.04818e-06	8.01334e-07	0.000207878	5.047e-05	3.3551e-05	2.70297e-06	3.0313e-06
EU	182	Oil/hazardous waste for treatment: incineration	p90.1.g																				1.57051e-05	1.22006e-05	8.88057e-06	6.69372e-07	6.06123e-06	1.16376e-05	3.72341e-05	0.000140709	1.61308e-05	4.69332e-06	9.42728e-07	5.20127e-05	1.92999e-06	5.15619e-06	8.32671e-05	5.40218e-06	3.52519e-06	0.00142687	0.000177769	0.000472287	1.83855e-05	3.79682e-05
EU	183	Food waste for treatment: biogasification and land application	p90.2.a																				1.24668e-06	3.38509e-07	3.1251e-07	2.87496e-08	3.52649e-07	2.37947e-07	2.5919e-06	1.43217e-06	8.75874e-07	4.90835e-07	1.51864e-07	1.84294e-06	3.42568e-08	8.4659e-08	1.3754e-06	4.14789e-07	1.67688e-07	1.51489e-05	3.19782e-06	5.2602e-06	3.83971e-07	4.99683e-07
EU	184	Paper waste for treatment: biogasification and land application	p90.2.b																				9.99937e-08	2.34062e-08	2.20876e-08	3.03848e-09	3.12386e-08	2.07969e-08	2.25252e-07	1.9729e-07	7.46037e-08	8.04869e-08	2.44729e-08	1.4393e-07	2.1343e-09	2.15408e-08	1.63449e-07	7.61004e-08	1.81118e-08	1.68519e-06	5.15227e-07	6.9445e-07	4.40675e-08	5.49504e-08
EU	185	Sewage sludge for treatment: biogasification and land application	p90.2.c																				1.15697e-05	1.85198e-05	1.29364e-05	2.71891e-07	3.54274e-06	9.17609e-06	3.02807e-05	2.38079e-05	6.56611e-06	2.68946e-06	7.0401e-07	2.8177e-05	2.82334e-07	1.22717e-06	1.79079e-05	2.52031e-06	1.47257e-06	0.000248631	3.33595e-05	8.1464e-05	7.71389e-06	7.44623e-06
EU	186	Food waste for treatment: composting and land application	p90.3.a																				0.00021458	0.00079335	0.000666202	1.63041e-05	7.89974e-05	0.000178919	0.000491513	0.000706408	0.000199279	0.000132298	4.29137e-05	0.00031588	1.96064e-05	3.91999e-05	0.00107601	0.000331289	6.60885e-05	0.00768066	0.00140124	0.00202436	0.000416539	0.0003471
EU	187	Paper and wood waste for treatment: composting and land application	p90.3.b																				8.83988e-08	1.11498e-07	9.6694e-08	7.67159e-10	2.42151e-08	1.83626e-08	1.84645e-07	2.50164e-08	7.46587e-08	2.60696e-09	2.67096e-09	8.86357e-09	9.10152e-10	7.06225e-10	6.98327e-08	4.14077e-09	7.43144e-09	2.0894e-07	6.16411e-08	3.86868e-08	1.2615e-08	1.56916e-08
EU	188	Food waste for treatment: waste water treatment	p90.4.a																				0.000156975	9.64657e-05	7.96251e-05	4.40066e-06	4.67232e-05	8.45817e-05	0.000333291	0.000250747	8.72956e-05	1.98238e-05	6.50487e-06	0.000273649	8.5361e-06	7.22066e-06	0.000156814	1.94194e-05	2.40534e-05	0.0013908	0.000224297	0.000503908	6.61084e-05	8.88164e-05
EU	189	Other waste for treatment: waste water treatment	p90.4.b																				0.000166378	0.00016889	0.000134987	7.29172e-06	5.35255e-05	0.000146089	0.000384009	0.000472313	0.000142044	4.618e-05	1.45686e-05	0.00058713	1.55427e-05	1.30287e-05	0.000252483	3.46363e-05	2.94428e-05	0.00242358	0.000379447	0.000865544	0.000104398	0.000152516
EU	190	Food waste for treatment: landfill	p90.5.a																				0.000128553	0.00195794	0.00158479	0.000116577	5.91901e-05	0.00222636	0.000521872	0.00220346	0.000616889	9.26062e-05	3.60881e-05	0.000558366	0.000343719	4.51013e-05	0.0017594	0.000153718	0.000226499	0.0182866	0.0017207	0.00639099	0.0010497	0.00113297
EU	191	Paper for treatment: landfill	p90.5.b																				2.76469e-05	0.000352072	0.000284478	1.53443e-05	1.30092e-05	0.000214336	0.000103347	0.000459937	9.65287e-05	2.13748e-05	7.16002e-06	0.000108044	3.54453e-05	1.07813e-05	0.000402822	3.19104e-05	4.45863e-05	0.00391726	0.000445613	0.00128187	0.000238611	0.000241151
EU	192	Plastic waste for treatment: landfill	p90.5.c																				3.26342e-06	1.66824e-05	1.34879e-05	7.37046e-07	1.56975e-06	1.23609e-05	8.52568e-06	2.64072e-05	6.58e-06	1.92019e-06	6.16338e-07	5.99472e-06	2.26807e-06	9.74524e-07	2.87465e-05	2.38956e-06	4.26615e-06	0.000275086	3.88778e-05	9.76086e-05	9.49445e-06	1.00291e-05
EU	193	Inert/metal/hazardous waste for treatment: landfill	p90.5.d																				1.32687e-05	2.55787e-05	2.06505e-05	5.25868e-07	4.04342e-06	1.05035e-05	3.17443e-05	7.37284e-05	9.10954e-06	3.02219e-06	9.71469e-07	3.74596e-05	1.67999e-06	1.26914e-06	4.20829e-05	2.87441e-06	2.61283e-06	0.000660631	6.4252e-05	0.000240448	1.30615e-05	2.28112e-05
EU	194	Textiles waste for treatment: landfill	p90.5.e																				2.42725e-06	3.63837e-05	2.78069e-05	1.53035e-06	1.26928e-06	2.41379e-05	1.29563e-05	5.21087e-05	1.18619e-05	2.51805e-06	7.61885e-07	1.12993e-05	5.25191e-06	1.81624e-06	6.57291e-05	4.27131e-06	1.05644e-05	0.000392	4.53612e-05	0.000140745	2.52187e-05	2.77135e-05
EU	195	Wood waste for treatment: landfill	p90.5.f																				4.24283e-06	3.33624e-05	2.64638e-05	2.27254e-06	2.28618e-06	3.87392e-05	1.37658e-05	4.717e-05	1.67673e-05	3.60292e-06	1.18092e-06	9.99267e-06	6.96941e-06	1.11246e-06	4.85006e-05	4.2045e-06	9.6247e-06	0.000358601	4.21677e-05	0.000137008	2.25522e-05	2.34799e-05
EU	196	Membership organisation services n.e.c. (91)	p91																				3.89206e-09	2.30499e-09	1.72922e-09	1.1983e-09	1.37322e-09	4.94686e-09	9.74006e-09	1.87316e-08	3.20944e-08	3.55712e-09	1.08692e-09	4.59175e-09	7.5068e-10	1.28287e-09	1.23533e-08	1.10762e-08	1.09959e-08	6.79358e-08	7.53944e-08	5.07753e-08	2.25276e-08	1.887e-08
EU	197	Recreational, cultural and sporting services (92)	p92																				3.9888e-06	1.01792e-06	9.39122e-07	1.33665e-06	1.78855e-06	3.51287e-05	1.04335e-05	6.99888e-06	2.60671e-05	1.22103e-06	3.32296e-07	3.54736e-06	8.29727e-07	2.83367e-07	4.44604e-06	1.39504e-06	1.34106e-06	1.75735e-05	1.64953e-05	7.85794e-06	9.43465e-06	6.80686e-06
EU	198	Other services (93)	p93																				1.82549e-05	9.26902e-06	8.12736e-06	4.81468e-07	5.73929e-06	5.63307e-06	3.92433e-05	6.99258e-06	3.74423e-05	9.86287e-07	5.91143e-07	1.95179e-06	4.13113e-07	5.34407e-07	4.41414e-06	1.0466e-06	9.70497e-07	2.32164e-05	1.29433e-05	5.22049e-06	1.38162e-05	6.92528e-06
EU	199	Private households with employed persons (95)	p95																				1.40307e-07	8.07553e-08	5.63111e-08	2.8573e-08	6.25109e-08	1.51594e-07	4.79315e-07	7.09221e-07	4.44253e-05	1.44829e-07	5.83998e-08	9.03855e-07	9.6684e-09	1.11435e-08	8.9946e-07	4.05089e-07	2.03286e-07	8.34642e-07	1.41361e-06	1.47171e-06	4.54502e-07	2.94177e-07
EU	200	Extra-territorial organizations and bodies	p99																				0	0	0	0	0	0	0	0	0	0	0	0	0	0	0	0	0	0	0	0	0	0
NonEU	1	Paddy rice	p01.b																				0.000192919	0.000134451	0.000102018	4.13032e-05	7.54568e-05	0.000236276	0.000389764	0.00146595	0.0011032	0.000186543	7.19928e-05	0.000430517	3.14875e-05	4.14176e-05	0.000732818	0.000714201	0.00583939	0.0038814	0.00166027	0.011063	0.000857527	0.000847613
NonEU	2	Wheat	p01.c																				6.16401e-05	4.1198e-05	3.05118e-05	1.16578e-05	1.77747e-05	7.39914e-05	9.72162e-05	0.000462947	0.000278369	4.57657e-05	2.70168e-05	9.87715e-05	1.04591e-05	3.57735e-05	0.000274157	0.000191986	0.0194838	0.000934609	0.000640625	0.00440919	0.00028748	0.00024398
NonEU	3	Cereal grains nec	p01.d																				5.34414e-05	2.65472e-05	2.25932e-05	9.48752e-06	1.39942e-05	7.01313e-05	7.7802e-05	0.000203648	0.000276324	3.00044e-05	1.68174e-05	6.12291e-05	8.30326e-06	3.81295e-05	0.000136127	0.000154361	0.009815	0.000631516	0.000350175	0.00255465	0.000241065	0.000189275
NonEU	4	Vegetables, fruit, nuts	p01.e																				4.94723e-05	3.25304e-05	2.67385e-05	9.47928e-06	1.78135e-05	6.76395e-05	0.000100619	0.000168358	0.000198603	3.99563e-05	1.44506e-05	6.46706e-05	7.35864e-06	4.52569e-05	0.000246684	0.000122492	0.00682355	0.000548004	0.000346255	0.00228092	0.000258771	0.000313204
NonEU	5	Oil seeds	p01.f																				3.63384e-05	2.84343e-05	2.27072e-05	8.39739e-06	1.26486e-05	5.23917e-05	7.35699e-05	0.000141273	0.000148979	3.05999e-05	1.23322e-05	4.16019e-05	6.05687e-06	3.09993e-05	0.000128226	0.000105862	0.00190896	0.000425711	0.00036021	0.000696877	0.000193927	0.000170083
NonEU	6	Sugar cane, sugar beet	p01.g																				2.67054e-05	1.31334e-05	1.34454e-05	4.13755e-06	7.55919e-06	2.42399e-05	3.59314e-05	0.000120712	0.000250031	1.46115e-05	4.59734e-06	2.49088e-05	2.25597e-06	1.94649e-05	5.11811e-05	0.000149817	0.00292505	0.000234636	0.000140261	0.000645993	0.000109035	0.000101521
NonEU	7	Plant-based fibers	p01.h																				1.65097e-05	1.23453e-05	1.05965e-05	1.51382e-05	8.9615e-06	4.23035e-05	3.78374e-05	4.36979e-05	3.62974e-05	1.05028e-05	3.26225e-06	1.1129e-05	4.0903e-06	2.01571e-06	2.47408e-05	5.61647e-05	9.02557e-05	0.000961495	0.00102043	0.00013523	6.93238e-05	4.66894e-05
NonEU	8	Crops nec	p01.i																				4.53362e-05	3.15947e-05	3.12698e-05	3.83016e-05	1.30077e-05	6.64939e-05	8.11961e-05	0.000199664	0.000250359	4.46956e-05	2.35767e-05	5.24715e-05	6.84391e-06	1.53607e-05	0.000153859	0.000121321	0.00263326	0.000547971	0.000337389	0.000827843	0.000175087	0.000200716
NonEU	9	Cattle	p01.j																				0.000465696	0.000342433	0.000313938	8.19146e-05	0.000196559	0.000562811	0.000725237	0.00172063	0.0071752	0.000493302	0.000160942	0.000712294	6.81511e-05	0.00015839	0.00158504	0.00290723	0.160409	0.0065508	0.00337746	0.037456	0.00194899	0.00148502
NonEU	10	Pigs	p01.k																				8.56383e-05	4.90084e-05	3.14918e-05	1.24284e-05	1.97168e-05	7.07332e-05	0.000116166	0.00107458	0.000340404	5.33156e-05	1.92566e-05	0.000112868	6.73512e-06	3.21518e-05	0.000301683	0.000163304	0.00621664	0.000752416	0.000379928	0.00201351	0.000349904	0.000277993
NonEU	11	Poultry	p01.l																				5.46602e-05	4.26091e-05	2.93038e-05	7.59131e-06	1.43161e-05	8.8947e-05	6.98995e-05	0.000141481	0.000539783	6.47807e-05	1.04283e-05	5.78585e-05	4.56107e-06	3.85815e-05	0.000129585	0.000124575	0.0086514	0.000473369	0.000270578	0.00190373	0.000277118	0.000176154
NonEU	12	Meat animals nec	p01.m																				3.13742e-05	2.22613e-05	1.63721e-05	7.01778e-06	1.20623e-05	4.39644e-05	6.87871e-05	0.0001532	0.000208794	3.05824e-05	1.46928e-05	5.08106e-05	4.91603e-06	3.31474e-05	0.000236109	0.000282737	0.0325506	0.000428742	0.000514653	0.00679937	0.00023966	0.000165398
NonEU	13	Animal products nec	p01.n																				5.01198e-06	2.9359e-06	2.23378e-06	7.41968e-07	1.4712e-06	5.85156e-06	8.53058e-06	2.74929e-05	1.51125e-05	4.00215e-06	2.4191e-06	6.78098e-06	7.59149e-07	1.88008e-06	2.20255e-05	1.95248e-05	1.2136e-05	7.56067e-05	2.43225e-05	5.59208e-05	2.10523e-05	2.18969e-05
NonEU	14	Raw milk	p01.o																				0.000317009	0.00022474	0.000164849	6.16611e-05	0.000108602	0.000414571	0.000579865	0.00178236	0.00174987	0.000344312	0.000108744	0.000721498	4.4393e-05	0.000305348	0.00159186	0.00188616	0.233625	0.00410286	0.0039369	0.049884	0.00237454	0.00173167
NonEU	15	Wool, silk-worm cocoons	p01.w.1																				2.13564e-05	3.97162e-05	1.84849e-05	2.1291e-06	1.2004e-05	5.46425e-05	7.91502e-05	3.98984e-05	5.31939e-05	1.53703e-05	2.27211e-06	1.09987e-05	3.13822e-06	1.37472e-05	5.27294e-05	6.42517e-05	0.00124149	0.000158946	0.000139262	0.000171747	6.86051e-05	6.02659e-05
NonEU	16	Manure (conventional treatment)	p01.w.2																				0	0	0	0	0	0	0	0	0	0	0	0	0	0	0	0	0	0	0	0	0	0
NonEU	17	Manure (biogas treatment)	p02																				0	0	0	0	0	0	0	0	0	0	0	0	0	0	0	0	0	0	0	0	0	0
NonEU	18	Products of forestry, logging and related services (02)	p05																				2.77076e-05	1.24056e-05	1.21179e-05	4.70532e-06	1.4182e-05	2.39213e-05	5.6825e-05	8.65599e-05	6.44562e-05	7.99929e-06	2.56166e-06	6.87034e-06	1.61256e-06	3.40901e-06	2.72921e-05	3.54728e-05	3.80503e-05	9.93655e-05	6.95864e-05	0.000105179	4.15302e-05	2.98937e-05
NonEU	19	Fish and other fishing products; services incidental of fishing (05)	p10.a																				9.8661e-07	1.9616e-06	1.60551e-06	3.00747e-07	5.32111e-07	2.3788e-06	2.34572e-06	7.69468e-06	4.21469e-06	1.6228e-06	5.76767e-07	4.07688e-06	3.18426e-07	4.10551e-07	7.81048e-06	5.83137e-06	1.1692e-05	2.50268e-05	8.37091e-06	1.69951e-05	6.59916e-06	1.41914e-05
NonEU	20	Anthracite	p10.b																				0.531722	0.000164914	0.000342323	0.000824574	7.37198e-05	0.000115053	0.000147637	0.000937512	0.000162019	5.35539e-05	1.54831e-05	1.59647e-05	2.84983e-05	8.23313e-06	0.000232962	8.36847e-05	0.000136717	0.000421119	0.000215972	0.00111651	0.00014498	0.000122622
NonEU	21	Coking Coal	p10.c																				0.00150894	0.164063	0.000473853	9.37136e-05	0.000143063	0.000683599	0.00230784	0.394778	0.00277986	0.000242879	7.65025e-05	0.000141402	2.61349e-05	0.000380663	0.000766667	0.00333771	0.00101713	0.00158743	0.00142425	0.00521269	0.000742938	0.000713559
NonEU	22	Other Bituminous Coal	p10.d																				0.00808944	0.0103754	0.325014	0.0187221	0.00101521	0.0244738	0.0049699	0.0100324	0.00553162	0.000622331	0.000175536	0.000432049	0.000363098	0.000404301	0.00240962	0.00216351	0.00477976	0.0113037	0.00983358	0.0108403	0.00261194	0.00222504
NonEU	23	Sub-Bituminous Coal	p10.e																				0.00110667	0.000241573	0.000309553	0.898823	0.000660549	0.000273137	0.0020892	0.000883497	0.00133757	0.000156673	4.7697e-05	3.03572e-05	3.83257e-05	0.000708756	0.000126054	0.00791825	0.00152202	0.000259281	0.00239168	0.000538203	0.000142909	0.000188299
NonEU	24	Patent Fuel	p10.f																				3.36139e-06	1.84252e-06	1.45134e-06	3.53485e-07	0.000126916	3.64255e-06	5.05793e-06	5.9043e-06	1.18324e-05	1.26698e-06	5.96685e-07	3.4756e-06	1.93515e-07	1.34413e-06	9.36569e-06	1.00973e-05	5.85638e-06	1.48206e-05	8.37818e-06	1.49149e-05	1.16676e-05	6.34085e-06
NonEU	25	Lignite/Brown Coal	p10.g																				9.06537e-05	7.09282e-05	7.94908e-05	5.95121e-06	4.34174e-05	0.0166273	0.000133728	0.000160023	3.98409e-05	2.0507e-05	1.61342e-06	1.2514e-05	4.01051e-06	0.0027006	0.000118141	2.19661e-05	6.40834e-05	0.000236495	6.31243e-05	0.000146018	2.63288e-05	3.12789e-05
NonEU	26	BKB/Peat Briquettes	p10.h																				4.4055e-05	2.46304e-06	4.3214e-06	2.95679e-06	5.81998e-07	5.36954e-06	0.0135176	5.52502e-06	1.192e-05	1.76861e-06	8.06587e-07	1.37324e-06	2.95691e-07	2.40045e-06	5.42128e-06	2.65671e-06	3.75871e-06	1.93146e-05	3.39762e-05	1.40733e-05	1.43306e-05	3.44706e-05
NonEU	27	Peat	p11.a																				2.40958e-06	3.08308e-06	2.71001e-06	7.48473e-08	7.03889e-07	1.01349e-06	3.39876e-05	0.00074029	4.17938e-06	2.75181e-07	9.01732e-08	8.12775e-07	4.96429e-08	3.1675e-07	9.22072e-07	6.55387e-07	1.22702e-06	5.6711e-06	1.87088e-06	4.96213e-06	1.78651e-06	1.41915e-06
NonEU	28	Crude petroleum and services related to crude oil extraction, excluding surveying	p11.b																				0.000946606	0.00201322	0.00147082	0.000555717	0.00145881	0.0205442	0.00368867	0.00794533	0.349482	0.00539912	0.000828649	0.00629881	0.000309938	0.000967292	0.00853461	0.0337351	0.0117129	0.0307962	0.0143569	0.0230828	0.017286	0.0160468
NonEU	29	Natural gas and services related to natural gas extraction, excluding surveying	p11.b.1																				0.000732015	0.000749639	0.000368573	0.000175412	0.00533709	0.103653	0.00945832	0.01455	0.0630295	0.397971	0.000130724	0.0264354	0.000433949	0.000258343	0.000813239	0.00206203	0.00115465	0.00269522	0.0646572	0.0080883	0.00260069	0.00177282
NonEU	30	Natural Gas Liquids	p11.c																				8.14345e-05	7.28358e-05	5.28928e-05	3.92924e-05	6.22569e-05	0.000175738	0.000223435	0.000403785	0.0013399	9.24677e-05	0.0677183	0.000130262	2.11152e-05	4.25116e-05	0.000439896	0.00194516	0.00242793	0.0016596	0.00118449	0.0143037	0.00117147	0.000715386
NonEU	31	Other Hydrocarbons	p12																				2.4241e-05	2.24705e-05	1.49777e-05	4.30114e-06	5.76779e-06	2.37792e-05	3.29723e-05	4.56802e-05	0.000100817	9.47599e-06	1.86664e-05	3.33233e-05	2.75586e-06	5.4888e-06	7.76175e-05	0.000112344	0.000129666	0.000210258	0.000116211	0.000845506	0.000228094	9.22658e-05
NonEU	32	Uranium and thorium ores (12)	p13.1																				7.54868e-06	3.27651e-05	1.50233e-05	1.76419e-06	3.05959e-06	9.12457e-06	1.585e-05	4.42085e-05	0.000159835	5.55383e-06	2.19399e-06	1.97334e-05	1.29616e-06	2.75984e-06	3.75256e-05	0.000939855	0.000159492	0.000308464	8.61644e-05	0.000180741	2.96244e-05	3.17391e-05
NonEU	33	Iron ores	p13.20.11																				7.63265e-05	0.000129291	8.23283e-05	1.14271e-05	3.129e-05	0.000125824	0.000182347	0.000288396	0.000241013	7.29763e-05	1.02143e-05	1.83794e-05	1.06445e-05	0.010922	0.000663175	0.000904007	0.00162618	0.000961632	0.000342922	0.0033451	0.000137133	0.000123042
NonEU	34	Copper ores and concentrates	p13.20.12																				9.96336e-05	9.58327e-05	7.10972e-05	1.56565e-05	3.38631e-05	9.25645e-05	0.000204089	0.000254144	0.000266522	4.31265e-05	2.20955e-05	3.60625e-05	1.29504e-05	6.79291e-05	0.0489926	0.00192349	0.0194901	0.00205194	0.00200734	0.0435338	0.000220986	0.00016707
NonEU	35	Nickel ores and concentrates	p13.20.13																				2.63159e-05	1.83549e-05	1.30679e-05	3.76446e-06	1.04638e-05	2.73926e-05	5.9282e-05	0.000111695	6.65082e-05	1.71518e-05	3.80609e-06	1.3116e-05	3.32452e-06	2.49067e-05	0.000283021	0.751248	0.00178331	0.000212064	0.000300821	0.00183006	5.59546e-05	8.25794e-05
NonEU	36	Aluminium ores and concentrates	p13.20.14																				2.47066e-05	1.85788e-05	1.38163e-05	1.09481e-05	1.02207e-05	3.91854e-05	6.5512e-05	9.26626e-05	6.63994e-05	1.23239e-05	4.90914e-06	5.94845e-06	5.41481e-06	4.04937e-06	5.23415e-05	0.000180197	0.300123	0.000132661	0.000149224	0.000194195	0.000356386	0.000115081
NonEU	37	Precious metal ores and concentrates	p13.20.15																				2.25015e-05	1.89659e-05	9.98981e-06	3.7188e-06	9.95504e-06	1.70066e-05	5.28957e-05	7.43148e-05	5.62977e-05	9.55811e-06	3.49439e-06	9.17851e-06	1.93805e-06	4.58125e-06	0.00109757	4.97594e-05	7.68433e-05	0.000517059	0.00166014	0.000504196	4.46998e-05	3.78689e-05
NonEU	38	Lead, zinc and tin ores and concentrates	p13.20.16																				2.92552e-05	2.61633e-05	1.57077e-05	3.68396e-06	8.49704e-06	2.74022e-05	5.20466e-05	0.000159305	6.07525e-05	1.2657e-05	5.33177e-06	8.40393e-06	6.25223e-06	3.10729e-05	0.000265947	0.0388002	0.00204136	0.000732193	0.0594423	0.00363503	4.98249e-05	4.75773e-05
NonEU	39	Other non-ferrous metal ores and concentrates	p14.1																				6.79982e-05	5.71113e-05	3.68903e-05	8.49148e-06	2.73351e-05	7.09624e-05	0.000158979	0.000235354	0.000172111	4.85236e-05	1.40617e-05	2.34623e-05	8.69432e-06	4.7739e-05	0.000306263	0.0041333	0.00293233	0.000748407	0.000701197	0.276781	0.000139195	0.000151281
NonEU	40	Stone	p14.2																				6.11697e-05	3.29958e-05	4.80312e-05	0.000105619	1.85909e-05	2.81943e-05	6.07215e-05	0.000346735	7.28778e-05	8.44077e-05	4.24026e-05	1.38936e-05	3.02644e-06	9.51315e-06	5.72108e-05	5.85703e-05	6.48044e-05	0.000260109	0.000145305	0.000228549	0.0350516	0.000272838
NonEU	41	Sand and clay	p14.3																				7.19764e-05	6.07995e-05	4.92849e-05	3.82683e-05	3.45783e-05	0.000114824	0.00016235	0.000324704	0.000304319	6.12281e-05	2.58189e-05	6.40704e-05	1.23502e-05	3.50231e-05	0.00109403	0.000384498	0.0134593	0.00111162	0.000552469	0.00572152	0.0035343	0.0311458
NonEU	42	Chemical and fertilizer minerals, salt and other mining and quarrying products n.e.c.	p15.a																				9.67361e-06	1.47444e-05	1.28927e-05	2.23553e-06	1.30446e-05	1.12507e-05	2.25854e-05	5.07319e-05	5.50413e-05	5.88946e-06	2.29154e-06	7.34073e-06	1.26993e-06	2.63471e-06	4.71888e-05	7.71117e-05	0.0001636	0.000100679	6.33814e-05	0.000120633	0.00028081	7.25919e-05
NonEU	43	Products of meat cattle	p15.b																				2.54679e-06	2.2613e-06	1.77301e-06	6.13378e-07	1.11596e-06	3.46425e-06	5.98995e-06	9.89745e-06	1.14106e-05	3.68498e-06	1.74282e-06	8.36979e-06	4.09209e-07	1.14519e-06	1.33843e-05	2.91535e-05	1.43117e-05	4.88618e-05	2.18708e-05	3.6529e-05	1.48264e-05	1.52684e-05
NonEU	44	Products of meat pigs	p15.c																				2.40992e-06	1.50413e-06	1.26616e-06	3.7344e-07	6.22868e-07	2.79657e-06	4.12355e-06	4.73327e-06	1.15312e-05	2.16834e-06	6.13684e-07	5.00958e-06	2.41718e-07	3.51486e-06	9.54963e-06	1.11671e-05	1.95906e-05	3.0357e-05	1.38032e-05	4.93586e-05	1.32573e-05	1.45275e-05
NonEU	45	Products of meat poultry	p15.d																				2.65787e-06	1.54734e-06	1.33563e-06	3.98155e-07	7.35472e-07	2.98854e-06	4.35557e-06	4.86879e-06	2.42832e-05	2.4208e-06	8.61119e-07	4.79711e-06	2.57181e-07	5.22524e-06	1.10455e-05	6.39094e-06	1.28024e-05	3.69661e-05	1.47189e-05	4.0101e-05	1.40762e-05	1.66435e-05
NonEU	46	Meat products nec	p15.e																				3.17392e-06	2.90731e-06	2.24253e-06	1.42689e-06	1.14831e-06	4.27421e-06	9.62232e-06	1.93381e-05	1.64071e-05	4.72416e-06	2.25954e-06	7.31611e-06	4.78363e-07	2.06107e-06	1.50386e-05	4.04119e-05	3.14538e-05	6.31725e-05	2.79786e-05	5.91616e-05	2.93267e-05	1.96825e-05
NonEU	47	products of Vegetable oils and fats	p15.f																				4.77738e-06	4.13361e-06	3.50666e-06	1.07446e-06	2.05366e-06	6.35919e-06	8.70646e-06	3.36134e-05	4.14843e-05	6.65931e-06	2.14151e-06	1.29771e-05	7.665e-07	1.77508e-06	2.42761e-05	3.02148e-05	0.000148712	8.75247e-05	3.77913e-05	0.000101328	2.60444e-05	3.81198e-05
NonEU	48	Dairy products	p15.g																				2.03246e-06	2.00304e-06	1.52305e-06	5.57752e-07	9.69955e-07	3.04707e-06	4.65257e-06	1.23907e-05	1.03888e-05	3.65234e-06	1.18697e-06	9.19666e-06	3.62485e-07	8.74837e-07	1.23985e-05	1.05288e-05	1.89782e-05	4.62809e-05	2.07556e-05	4.82866e-05	1.38383e-05	1.45375e-05
NonEU	49	Processed rice	p15.h																				5.32338e-06	4.53276e-06	3.6095e-06	1.17384e-06	2.71666e-06	8.32093e-06	1.2988e-05	1.90612e-05	2.71733e-05	6.29115e-06	4.75581e-06	1.38067e-05	9.44318e-07	1.37854e-06	2.79181e-05	3.47835e-05	6.19834e-05	8.79943e-05	3.97504e-05	0.000112421	3.18752e-05	5.52868e-05
NonEU	50	Sugar	p15.i																				1.60156e-06	1.50543e-06	1.22283e-06	3.73376e-07	6.92164e-07	2.70022e-06	3.63268e-06	6.43416e-06	1.03431e-05	2.54109e-06	7.27269e-07	5.46967e-06	3.11363e-07	8.41418e-07	9.46022e-06	6.5189e-06	6.84224e-05	3.31091e-05	1.42718e-05	5.76814e-05	1.00453e-05	1.12322e-05
NonEU	51	Food products nec	p15.j																				1.0717e-05	7.7439e-06	6.63029e-06	2.52897e-06	3.94258e-06	1.984e-05	1.81071e-05	4.69948e-05	6.52135e-05	1.57241e-05	4.05425e-06	2.70835e-05	2.31248e-06	6.7236e-06	4.464e-05	2.1268e-05	0.000609328	0.00017075	7.56714e-05	0.000293923	6.38059e-05	9.01299e-05
NonEU	52	Beverages	p15.k																				5.84746e-06	5.14065e-06	4.12756e-06	1.73619e-06	2.87889e-06	1.0183e-05	1.25721e-05	3.5332e-05	2.40744e-05	9.36087e-06	2.51678e-06	2.24282e-05	1.58404e-06	3.10433e-06	6.52387e-05	1.45841e-05	0.000213225	0.000138638	5.33112e-05	0.000196945	4.24119e-05	4.88323e-05
NonEU	53	Fish products	p16																				3.79352e-06	2.73286e-06	2.17057e-06	8.55603e-07	1.67804e-06	4.6063e-06	8.09633e-06	1.47669e-05	1.83306e-05	5.52789e-06	1.69297e-06	1.16229e-05	6.28746e-07	1.07427e-06	1.62557e-05	1.34127e-05	0.000196886	6.28148e-05	2.84844e-05	9.75811e-05	1.87297e-05	2.11242e-05
NonEU	54	Tobacco products (16)	p17																				1.34865e-05	9.10633e-06	6.87757e-06	1.36202e-06	5.12596e-06	1.37284e-05	3.08388e-05	3.54457e-05	3.27397e-05	5.1624e-06	2.71157e-06	5.30521e-06	1.23876e-06	1.07196e-06	2.62343e-05	4.78072e-05	3.92147e-05	6.3047e-05	3.22401e-05	0.000110603	2.29574e-05	1.85213e-05
NonEU	55	Textiles (17)	p18																				2.83635e-05	5.01284e-05	3.82111e-05	1.4816e-05	1.13257e-05	0.000195465	7.81874e-05	0.000103059	7.91061e-05	1.33361e-05	6.00151e-06	3.29297e-05	1.91124e-05	8.61174e-06	5.49736e-05	6.94803e-05	0.000441305	0.000244807	0.000152507	0.000335492	9.75829e-05	7.75031e-05
NonEU	56	Wearing apparel; furs (18)	p19																				9.79718e-06	1.12152e-05	9.19943e-06	1.75045e-06	3.27896e-06	1.35475e-05	1.96503e-05	5.20903e-05	2.56016e-05	7.07918e-06	3.72511e-06	2.86775e-05	1.0859e-06	2.24888e-06	3.28536e-05	1.40439e-05	9.11344e-05	0.000131005	4.49359e-05	0.000161423	4.28634e-05	3.02578e-05
NonEU	57	Leather and leather products (19)	p20																				3.49341e-06	4.83596e-06	3.84313e-06	6.23859e-07	1.20787e-06	5.34429e-06	7.27347e-06	1.30956e-05	1.5054e-05	1.82137e-06	1.53211e-06	3.15491e-06	4.06381e-07	5.70262e-07	8.18124e-06	3.52042e-05	1.82384e-05	2.62289e-05	1.61927e-05	3.70161e-05	1.02349e-05	8.36448e-06
NonEU	58	Wood and products of wood and cork (except furniture); articles of straw and plaiting materials (20)	p20.w																				0.000151898	4.61534e-05	5.03143e-05	1.56771e-05	0.000101663	0.000102169	0.000328121	0.00029277	0.000143044	2.06116e-05	7.17455e-06	2.98909e-05	6.76896e-06	8.4686e-06	6.8259e-05	0.000112585	0.000114619	0.000378504	0.000256931	0.000350428	0.000156402	0.000109574
NonEU	59	Wood material for treatment, Re-processing of secondary wood material into new wood material	p21.1																				0	0	0	0	0	0	0	0	0	0	0	0	0	0	0	0	0	0	0	0	0	0
NonEU	60	Pulp	p21.w.1																				3.9361e-05	2.38795e-05	2.32218e-05	9.03542e-05	3.19562e-05	9.94303e-05	0.000330381	0.00075946	0.000195167	5.03558e-05	9.43403e-06	2.08858e-05	4.39527e-06	5.99049e-05	0.000209604	8.80743e-05	0.000328579	0.00440263	0.00442279	0.000509332	0.000375233	0.000110875
NonEU	61	Secondary paper for treatment, Re-processing of secondary paper into new pulp	p21.2																				0	0	0	0	0	0	0	0	0	0	0	0	0	0	0	0	0	0	0	0	0	0
NonEU	62	Paper and paper products	p22																				4.00052e-05	3.25436e-05	2.74913e-05	2.36066e-05	2.01551e-05	6.8046e-05	0.000112696	0.000175716	0.000124028	2.06493e-05	9.01819e-06	3.76262e-05	5.98665e-06	8.12394e-06	6.9093e-05	0.000102584	0.000136851	0.000384701	0.000332043	0.000341341	0.000223938	0.000135132
NonEU	63	Printed matter and recorded media (22)	p23.1.a																				7.15234e-06	1.12659e-05	8.68347e-06	5.23314e-06	3.23194e-06	1.31083e-05	2.30226e-05	4.28796e-05	2.34066e-05	7.47588e-06	1.78262e-06	1.03927e-05	1.34412e-06	2.86317e-06	1.52545e-05	1.31527e-05	1.22412e-05	0.00014218	0.00011544	6.72197e-05	8.93043e-05	4.02499e-05
NonEU	64	Coke Oven Coke	p23.1.b																				0.000150474	0.000146661	0.00010274	1.87267e-05	6.16258e-05	0.000202471	0.000404294	0.000601047	0.000811347	0.000235795	0.000553362	4.172e-05	1.39981e-05	9.06233e-05	0.000435606	0.000335057	0.000599719	0.000617056	0.000398121	0.00142817	0.000297221	0.00027316
NonEU	65	Gas Coke	p23.1.c																				2.62667e-05	1.69452e-05	1.14489e-05	3.47949e-06	1.21575e-05	2.83167e-05	5.60718e-05	4.93695e-05	0.000237416	1.43937e-05	2.60253e-06	9.81505e-06	4.74378e-06	2.86617e-06	8.2878e-05	0.00019128	0.00303614	0.000132989	0.000167984	0.00639955	6.50171e-05	3.91902e-05
NonEU	66	Coal Tar	p23.20.a																				9.75359e-06	7.91142e-06	5.22025e-06	1.1656e-06	3.09312e-06	1.10186e-05	2.22065e-05	2.3151e-05	1.68351e-05	3.64408e-06	1.06364e-06	2.87882e-06	7.6218e-07	1.22781e-06	1.81785e-05	2.35231e-05	2.64231e-05	3.47519e-05	2.21428e-05	6.47133e-05	1.85306e-05	2.57389e-05
NonEU	67	Motor Gasoline	p23.20.b																				5.17305e-05	4.98921e-05	3.0709e-05	1.88892e-05	2.42714e-05	8.70322e-05	0.000148753	0.000347096	0.000261234	0.00017309	2.80194e-05	8.42311e-05	9.13537e-06	3.87741e-05	0.000232283	0.000930259	0.000330141	0.000818167	0.000353048	0.000995591	0.00091269	0.000438932
NonEU	68	Aviation Gasoline	p23.20.c																				3.05875e-07	1.99778e-07	1.58145e-07	6.6734e-08	1.93246e-07	3.84288e-07	5.74408e-07	1.0479e-06	2.88952e-06	2.19513e-07	4.64788e-08	2.55618e-07	3.5334e-08	1.28247e-07	6.58195e-07	5.21558e-07	7.41029e-07	2.96649e-06	1.52549e-06	2.62656e-06	1.3009e-06	1.16219e-06
NonEU	69	Gasoline Type Jet Fuel	p23.20.d																				3.68612e-07	1.5843e-07	1.24152e-07	5.25022e-08	8.26187e-08	4.32858e-07	5.58998e-07	1.02606e-06	4.57907e-06	1.3657e-07	6.83646e-08	3.32353e-07	4.25346e-08	1.38979e-07	8.19338e-07	6.77751e-07	5.61377e-07	3.58604e-06	1.23434e-06	2.9213e-06	1.36563e-06	9.57529e-07
NonEU	70	Kerosene Type Jet Fuel	p23.20.e																				1.62949e-05	2.1673e-05	1.58349e-05	1.02121e-05	1.76621e-05	4.12811e-05	4.5882e-05	0.000130691	0.000132133	5.06699e-05	6.28636e-06	2.98917e-05	3.24077e-06	2.49625e-05	3.71338e-05	2.74088e-05	0.000192489	0.000236122	8.09134e-05	0.000260082	0.000269599	0.000283872
NonEU	71	Kerosene	p23.20.f																				7.92698e-06	4.55812e-06	2.84148e-06	1.52303e-06	2.16706e-06	8.50122e-06	2.21076e-05	3.52852e-05	4.42264e-05	9.22386e-06	2.71173e-06	2.93693e-05	1.22003e-06	4.05745e-06	3.43981e-05	5.67508e-05	3.45263e-05	7.46194e-05	3.40729e-05	0.000209721	4.25165e-05	4.73909e-05
NonEU	72	Gas/Diesel Oil	p23.20.g																				0.0001558	0.00019231	8.38379e-05	5.72097e-05	9.07728e-05	0.000267484	0.000362374	0.0007893	0.000823944	0.000365624	8.57926e-05	0.000199427	2.79526e-05	0.000118485	0.000602091	0.00065041	0.00238394	0.0024517	0.000878933	0.00466715	0.00279093	0.00229598
NonEU	73	Heavy Fuel Oil	p23.20.h																				0.000205939	9.59111e-05	6.4265e-05	0.000107116	9.76097e-05	0.000343314	0.000461165	0.00128509	0.000915262	0.000207902	0.000445874	0.000279735	0.000181689	0.000280137	0.00352625	0.00143885	0.00190986	0.00740903	0.00438777	0.0045456	0.00269702	0.00812315
NonEU	74	Refinery Gas	p23.20.i																				2.54549e-06	2.47058e-06	1.67954e-06	7.08936e-07	9.48927e-07	6.07072e-06	5.74649e-06	1.1882e-05	2.37498e-05	2.52163e-06	1.63696e-06	4.77697e-06	5.86311e-07	1.6486e-06	2.11135e-05	8.26979e-05	2.03155e-05	4.18644e-05	1.47972e-05	3.90541e-05	2.21187e-05	1.97426e-05
NonEU	75	Liquefied Petroleum Gases (LPG)	p23.20.j																				4.75896e-05	0.000173626	0.000138892	9.99005e-06	3.0452e-05	0.000143842	0.000111187	0.000204461	0.000354613	0.000226925	1.53663e-05	0.000108538	9.088e-06	8.81054e-05	0.00168564	0.0013931	0.000943644	0.0123944	0.000682098	0.00519258	0.000195641	0.000425257
NonEU	76	Refinery Feedstocks	p23.20.k																				1.20548e-05	7.71433e-06	5.18261e-06	3.08001e-06	4.18499e-06	2.13658e-05	2.28132e-05	4.57544e-05	0.000146189	1.75304e-05	1.48784e-05	1.81376e-05	2.42847e-06	1.08253e-05	5.62308e-05	0.000484163	0.000184782	0.00012331	6.31784e-05	0.000205455	9.82492e-05	7.48027e-05
NonEU	77	Ethane	p23.20.l																				2.86591e-06	3.19399e-06	2.63598e-06	5.62464e-07	9.34587e-07	2.93178e-06	5.54993e-06	7.9142e-06	1.71028e-05	1.62075e-06	6.25778e-07	1.42743e-06	4.19181e-07	8.44708e-07	6.34122e-06	1.82014e-05	1.7691e-05	2.64056e-05	2.29472e-05	3.16058e-05	8.79968e-06	1.8709e-05
NonEU	78	Naphtha	p23.20.m																				3.56511e-05	2.69051e-05	1.79937e-05	8.38051e-06	1.66052e-05	3.72317e-05	7.98362e-05	0.000125531	0.000107864	1.78943e-05	1.64414e-05	4.93748e-05	7.89991e-06	9.51989e-06	0.000111324	0.0134862	0.000672897	0.000499085	0.000384664	0.000431759	0.00326508	0.000109078
NonEU	79	White Spirit & SBP	p23.20.n																				7.07454e-06	2.75039e-06	2.48234e-06	9.35682e-07	5.83172e-06	6.27608e-06	2.25014e-05	5.53029e-05	1.1924e-05	3.07983e-06	1.59355e-06	6.96202e-06	5.38973e-07	1.48982e-06	9.71545e-06	1.94196e-05	2.27929e-05	2.84493e-05	1.63283e-05	3.69649e-05	2.0192e-05	2.78391e-05
NonEU	80	Lubricants	p23.20.o																				1.83852e-05	9.59144e-06	8.26602e-06	5.93626e-06	5.13912e-06	1.23763e-05	2.29392e-05	9.74338e-05	3.76183e-05	1.45331e-05	5.54132e-06	6.75889e-05	1.37759e-06	5.17145e-06	3.93303e-05	8.27369e-05	0.000309751	0.00011658	5.20271e-05	0.000162473	9.3676e-05	8.26018e-05
NonEU	81	Bitumen	p23.20.p																				1.43913e-05	4.84014e-06	8.71337e-06	1.96791e-05	3.19831e-06	0.000316031	0.000146282	0.000247817	2.35152e-05	9.35424e-06	3.97741e-06	0.00036327	1.06418e-05	4.3009e-06	2.17549e-05	0.00017412	4.17861e-05	6.27858e-05	5.16182e-05	8.14387e-05	6.23699e-05	4.93181e-05
NonEU	82	Paraffin Waxes	p23.20.q																				8.01169e-06	3.87192e-06	3.03224e-06	1.15112e-06	7.30508e-07	9.32696e-06	3.13826e-05	5.98522e-05	8.35926e-06	1.26399e-06	7.10486e-07	1.55657e-05	3.15393e-07	2.03276e-06	8.52838e-06	1.39271e-05	9.46397e-06	1.57097e-05	7.91571e-06	1.95142e-05	1.5213e-05	2.14112e-05
NonEU	83	Petroleum Coke	p23.20.r																				6.94243e-06	2.28967e-06	2.47195e-06	2.75503e-06	1.51138e-06	4.11844e-05	8.72376e-06	1.59844e-05	1.1684e-05	8.02359e-06	2.09376e-06	7.70872e-06	6.03401e-07	2.6896e-06	9.34526e-06	2.40959e-05	1.38875e-05	2.59307e-05	1.91469e-05	2.9239e-05	2.31898e-05	1.91069e-05
NonEU	84	Non-specified Petroleum Products	p23.3																				4.31743e-05	4.24166e-05	3.20442e-05	2.33903e-06	7.41745e-06	1.75985e-05	6.25947e-05	8.47326e-05	4.25696e-05	8.39727e-06	5.00329e-06	2.04814e-05	1.57512e-06	3.71825e-06	3.04721e-05	0.000111712	0.000217476	0.000109305	6.69302e-05	0.000205936	0.00163178	0.000175131
NonEU	85	Nuclear fuel	p24.a																				2.56138e-06	1.87294e-06	1.23821e-06	9.44202e-07	1.19353e-06	2.59177e-06	6.55398e-06	2.23058e-05	6.43815e-06	1.74564e-06	1.10144e-06	1.34624e-06	4.42231e-07	6.2993e-07	6.55359e-06	7.30455e-06	8.8273e-06	5.74299e-05	7.60519e-05	2.57496e-05	5.47446e-06	5.80063e-06
NonEU	86	Plastics, basic	p24.a.w																				0.000105049	0.000143777	0.000102198	4.67146e-05	9.17835e-05	0.000170654	0.000389713	0.000579356	0.000309185	0.00029115	8.57381e-05	4.93975e-05	3.5713e-05	4.37657e-05	0.000407282	0.000240791	0.00108936	0.003089	0.00420627	0.00196006	0.000226018	0.000212694
NonEU	87	Secondary plastic for treatment, Re-processing of secondary plastic into new plastic	p24.b																				0	0	0	0	0	0	0	0	0	0	0	0	0	0	0	0	0	0	0	0	0	0
NonEU	88	N-fertiliser	p24.c																				5.95433e-06	4.13473e-06	2.77042e-06	2.65129e-06	1.56233e-06	4.5437e-05	0.000344445	0.000834396	4.70218e-05	1.63818e-05	9.04288e-07	3.1639e-06	9.98864e-07	2.00123e-06	9.4526e-06	1.30704e-05	0.000212054	3.12367e-05	2.75744e-05	0.000123562	1.52281e-05	1.29203e-05
NonEU	89	P- and other fertiliser	p24.d																				4.39637e-05	3.39697e-05	2.58285e-05	1.31659e-05	1.54834e-05	0.000164363	0.000172841	0.000437443	0.000219902	6.06986e-05	9.57599e-06	2.56759e-05	0.000150326	1.25261e-05	0.00043945	0.00014988	0.00162868	0.00247584	0.000442372	0.00156076	0.000115738	0.000130683
NonEU	90	Chemicals nec	p24.e																				0.000476539	0.000393326	0.000296826	0.000102371	0.00016674	0.000566158	0.0010402	0.00172071	0.00169479	0.000343241	0.000148202	0.000384381	5.83668e-05	9.97686e-05	0.00137308	0.00760491	0.00578012	0.00399706	0.00373434	0.00632427	0.00142208	0.00121269
NonEU	91	Charcoal	p24.f																				9.26638e-05	0.00011211	0.000128375	1.87471e-05	0.000141179	0.000199335	6.53379e-05	0.000208788	0.00988685	3.85837e-05	3.56709e-07	5.0167e-05	2.76384e-06	1.63293e-05	3.79009e-05	0.000255414	0.000131984	0.00107611	9.38387e-05	0.000800163	1.47969e-05	1.7607e-05
NonEU	92	Additives/Blending Components	p24.g																				1.36075e-05	6.07603e-06	6.2175e-06	2.88735e-06	6.80753e-06	3.33721e-06	8.27072e-06	2.52437e-05	0.000314656	3.29712e-05	1.1134e-05	5.30306e-06	3.17431e-07	1.39636e-06	5.87031e-06	9.09731e-06	6.78734e-06	3.04708e-05	2.91435e-05	1.5952e-05	2.97375e-05	1.98976e-05
NonEU	93	Biogasoline	p24.h																				5.06026e-07	4.11471e-07	3.0641e-07	1.44223e-07	2.0678e-07	6.95578e-07	1.13628e-06	2.44025e-06	2.14852e-06	6.87505e-07	1.04198e-07	5.35464e-07	1.19106e-07	1.00088e-07	1.68859e-06	1.58177e-06	2.15259e-06	1.58359e-05	2.90566e-06	1.72752e-05	4.06252e-06	2.37345e-06
NonEU	94	Biodiesels	p24.i																				3.06813e-06	1.26716e-06	4.98817e-07	1.5422e-07	1.23176e-06	1.14436e-06	6.66639e-06	3.05025e-06	0.000161826	5.98691e-06	1.87207e-06	4.92373e-06	9.71176e-08	1.51166e-06	1.91441e-06	1.10036e-06	2.25349e-06	1.94004e-05	6.1807e-06	1.26514e-05	4.78425e-06	6.46046e-06
NonEU	95	Other Liquid Biofuels	p25																				2.38187e-07	1.6415e-07	1.2155e-07	5.28304e-08	6.49562e-08	3.50006e-07	4.78922e-07	9.52632e-07	2.36931e-06	1.54569e-07	4.93694e-08	2.87149e-07	3.88806e-08	8.01642e-08	8.45473e-07	3.90448e-07	1.46044e-06	4.82741e-06	1.21853e-06	4.08617e-06	1.36565e-06	1.04655e-06
NonEU	96	Rubber and plastic products (25)	p26.a																				7.60744e-05	8.98305e-05	6.99854e-05	1.75572e-05	3.39153e-05	0.000111234	0.000266952	0.000374865	0.000168297	4.35887e-05	1.20388e-05	3.37871e-05	1.00676e-05	8.28166e-06	0.000118092	0.000114797	0.000242677	0.000373139	0.00023725	0.00113712	0.000173618	0.000141375
NonEU	97	Glass and glass products	p26.a.w																				9.06091e-05	0.000104339	7.5105e-05	1.21691e-05	4.35665e-05	0.000102333	0.000196653	0.000299391	0.000170697	4.00758e-05	7.57347e-06	2.61162e-05	7.2029e-06	1.78821e-05	8.3846e-05	0.000116669	0.000167964	0.000352724	0.000288475	0.00170851	0.000224201	0.000181139
NonEU	98	Secondary glass for treatment, Re-processing of secondary glass into new glass	p26.b																				0	0	0	0	0	0	0	0	0	0	0	0	0	0	0	0	0	0	0	0	0	0
NonEU	99	Ceramic goods	p26.c																				2.5655e-05	1.40924e-05	1.14528e-05	4.47833e-06	9.1648e-06	3.49697e-05	5.67165e-05	4.50182e-05	6.16352e-05	1.40868e-05	2.99606e-06	1.37455e-05	5.81802e-06	8.09949e-06	3.3403e-05	2.69246e-05	3.78904e-05	0.000156798	0.000110481	0.000113733	7.92918e-05	8.35533e-05
NonEU	100	Bricks, tiles and construction products, in baked clay	p26.d																				6.83478e-06	3.0654e-06	2.52682e-06	4.01439e-06	1.76439e-06	6.2471e-05	1.28804e-05	1.39667e-05	1.72137e-05	3.75646e-06	1.04149e-06	2.92206e-06	7.48186e-07	3.80858e-06	0.000144414	1.64384e-05	2.48477e-05	7.01802e-05	3.85083e-05	5.18383e-05	3.0204e-05	2.95356e-05
NonEU	101	Cement, lime and plaster	p26.d.w																				0.000387302	0.000164281	0.000135322	0.000142833	8.70564e-05	0.000927867	0.000683927	0.000798362	0.00126913	0.000202717	5.89344e-05	0.000172829	3.31786e-05	0.000289492	0.00218266	0.00102954	0.000858942	0.00341738	0.00234274	0.00253779	0.00208582	0.0025208
NonEU	102	Ash for treatment, Re-processing of ash into clinker	p26.e																				0	0	0	0	0	0	0	0	0	0	0	0	0	0	0	0	0	0	0	0	0	0
NonEU	103	Other non-metallic mineral products	p27.a																				0.00018127	0.000119433	9.82685e-05	8.93398e-05	8.16822e-05	0.000214997	0.000431228	0.000415635	0.000462316	0.000203424	3.29945e-05	4.5841e-05	1.80206e-05	2.00751e-05	0.000272366	0.000228837	0.000390477	0.00144965	0.000577647	0.00143024	0.00062704	0.000562868
NonEU	104	Basic iron and steel and of ferro-alloys and first products thereof	p27.a.w																				0.00212047	0.00189368	0.0013323	0.000257695	0.000777845	0.00267047	0.00461254	0.00578085	0.00516337	0.0014863	0.000184323	0.000401692	0.000246805	0.000242316	0.00459099	0.00155623	0.00872764	0.00863279	0.00406407	0.0229776	0.00255196	0.00206128
NonEU	105	Secondary steel for treatment, Re-processing of secondary steel into new steel	p27.41																				0	0	0	0	0	0	0	0	0	0	0	0	0	0	0	0	0	0	0	0	0	0
NonEU	106	Precious metals	p27.41.w																				4.47131e-05	3.38011e-05	1.83987e-05	5.90898e-06	1.93653e-05	3.36669e-05	9.96067e-05	7.82338e-05	8.69775e-05	1.20865e-05	4.04038e-06	1.1331e-05	2.56534e-06	3.43377e-06	0.000686929	6.33184e-05	0.000205284	0.000156569	0.000126256	0.000353634	5.42087e-05	3.46326e-05
NonEU	107	Secondary preciuos metals for treatment, Re-processing of secondary preciuos metals into new preciuos metals	p27.42																				0	0	0	0	0	0	0	0	0	0	0	0	0	0	0	0	0	0	0	0	0	0
NonEU	108	Aluminium and aluminium products	p27.42.w																				0.000316982	0.000396588	0.000293157	3.20308e-05	0.000131349	0.000404501	0.000751357	0.000657851	0.00115093	0.00105402	6.01765e-05	7.7295e-05	4.33676e-05	8.84175e-05	0.000752106	0.000288339	0.000859773	0.00212706	0.000694697	0.00305147	0.000391147	0.000399423
NonEU	109	Secondary aluminium for treatment, Re-processing of secondary aluminium into new aluminium	p27.43																				0	0	0	0	0	0	0	0	0	0	0	0	0	0	0	0	0	0	0	0	0	0
NonEU	110	Lead, zinc and tin and products thereof	p27.43.w																				1.55627e-05	1.11272e-05	6.39733e-06	1.53925e-06	6.18952e-06	1.05453e-05	3.23348e-05	4.4123e-05	2.76388e-05	6.35742e-06	1.82175e-06	2.82162e-06	2.36252e-06	9.75004e-07	6.7675e-05	1.79376e-05	0.000217914	0.000233517	5.01593e-05	0.000247638	2.03787e-05	1.63659e-05
NonEU	111	Secondary lead for treatment, Re-processing of secondary lead into new lead	p27.44																				0	0	0	0	0	0	0	0	0	0	0	0	0	0	0	0	0	0	0	0	0	0
NonEU	112	Copper products	p27.44.w																				0.000140705	9.94814e-05	6.09624e-05	7.87788e-06	4.80043e-05	9.93859e-05	0.000310936	0.000150902	0.000167567	2.41896e-05	7.20786e-06	1.27253e-05	7.59106e-06	6.59961e-06	0.000223533	6.88794e-05	0.000206952	0.000553205	0.000168425	0.000852887	8.83603e-05	6.93778e-05
NonEU	113	Secondary copper for treatment, Re-processing of secondary copper into new copper	p27.45																				0	0	0	0	0	0	0	0	0	0	0	0	0	0	0	0	0	0	0	0	0	0
NonEU	114	Other non-ferrous metal products	p27.45.w																				9.9277e-05	7.33654e-05	5.46751e-05	8.72711e-06	4.04056e-05	9.3069e-05	0.000236448	0.000190472	0.00019621	7.96049e-05	1.2244e-05	1.48857e-05	9.67242e-06	8.42979e-06	0.000175913	5.83658e-05	0.000110512	0.000303046	0.000159897	0.000689249	9.77158e-05	8.80325e-05
NonEU	115	Secondary other non-ferrous metals for treatment, Re-processing of secondary other non-ferrous metals into new other non-ferrous metals	p27.5																				0	0	0	0	0	0	0	0	0	0	0	0	0	0	0	0	0	0	0	0	0	0
NonEU	116	Foundry work services	p28																				0.000206421	0.000125549	9.85103e-05	1.69622e-05	6.88746e-05	0.000183899	0.000444875	0.000304927	0.000308642	0.000158293	1.32568e-05	2.59189e-05	1.05203e-05	1.84482e-05	0.000142516	9.19877e-05	0.000167362	0.000428334	0.000314419	0.000696034	0.000201497	0.000149037
NonEU	117	Fabricated metal products, except machinery and equipment (28)	p29																				0.000243784	0.000206454	0.000166377	3.77874e-05	0.000136783	0.000380896	0.000690745	0.000800171	0.000770185	0.000116492	2.5375e-05	6.16785e-05	5.55276e-05	2.49913e-05	0.000291021	0.000265059	0.000496649	0.000803387	0.000534809	0.00219313	0.000394368	0.000308222
NonEU	118	Machinery and equipment n.e.c. (29)	p30																				8.26196e-05	0.000105288	6.49976e-05	1.83145e-05	6.7956e-05	0.000151804	0.000291843	0.000454153	0.000342901	5.79715e-05	2.35936e-05	2.14524e-05	1.1692e-05	1.42196e-05	0.000144517	0.000112233	0.000289869	0.000295572	0.000206055	0.00157089	0.000292276	0.000253426
NonEU	119	Office machinery and computers (30)	p31																				3.16457e-06	6.48586e-06	4.61393e-06	7.93055e-07	2.45959e-06	7.67761e-06	8.14258e-06	1.40059e-05	1.37396e-05	1.49292e-05	4.34225e-06	4.121e-06	3.29078e-07	5.59397e-07	9.77601e-06	1.66804e-05	8.02598e-06	2.69457e-05	1.62833e-05	2.40208e-05	1.09723e-05	9.08752e-06
NonEU	120	Electrical machinery and apparatus n.e.c. (31)	p32																				0.000481637	0.000159225	0.000145368	1.8779e-05	0.000146994	0.000396456	0.000992025	0.000120694	0.000326402	0.000695529	1.09461e-05	2.08064e-05	9.93817e-06	1.49835e-05	8.127e-05	3.56572e-05	9.64193e-05	0.00031106	0.000164192	0.000563271	0.000121795	0.000135999
NonEU	121	Radio, television and communication equipment and apparatus (32)	p33																				2.5834e-05	3.02169e-05	2.55793e-05	6.89496e-06	1.40195e-05	7.54431e-05	7.70498e-05	8.37631e-05	0.000108328	0.000432034	6.32474e-06	1.18003e-05	4.56858e-06	2.97314e-06	2.58535e-05	3.98548e-05	2.29762e-05	0.00013226	0.000150922	9.73566e-05	7.26229e-05	5.01135e-05
NonEU	122	Medical, precision and optical instruments, watches and clocks (33)	p34																				3.62159e-05	2.35528e-05	2.26739e-05	1.91182e-05	3.94232e-05	1.94625e-05	0.000230089	0.000410928	5.13921e-05	0.000171533	3.39395e-06	7.1904e-06	1.32607e-06	3.93531e-06	2.3368e-05	2.08443e-05	1.93692e-05	0.000647619	0.00200255	6.83217e-05	0.000220895	0.000105112
NonEU	123	Motor vehicles, trailers and semi-trailers (34)	p35																				7.6659e-06	1.07192e-05	8.14631e-06	2.49163e-06	8.93316e-06	2.51183e-05	2.73081e-05	4.15899e-05	4.75206e-05	1.25148e-05	5.43487e-06	1.03481e-05	2.82328e-06	3.19217e-06	1.56963e-05	1.25296e-05	4.27166e-05	7.39176e-05	3.53469e-05	0.000120211	5.28998e-05	3.48539e-05
NonEU	124	Other transport equipment (35)	p36																				2.09004e-05	3.95658e-05	3.19632e-05	6.75882e-06	1.08494e-05	8.05819e-05	4.4882e-05	9.28989e-05	7.623e-05	1.57758e-05	3.55555e-06	1.60385e-05	8.5653e-06	3.72431e-06	6.9868e-05	3.39656e-05	4.26377e-05	0.000271254	8.43923e-05	0.0002543	9.091e-05	0.000108822
NonEU	125	Furniture; other manufactured goods n.e.c. (36)	p37																				2.2187e-05	1.98466e-05	1.52005e-05	5.6732e-06	1.00795e-05	2.98236e-05	6.48531e-05	9.74903e-05	7.74062e-05	8.98019e-05	7.96197e-06	2.90813e-05	2.92012e-06	3.63474e-06	6.06285e-05	5.49326e-05	5.34132e-05	0.000224386	0.000128877	0.000238206	0.00011548	7.83518e-05
NonEU	126	Secondary raw materials	p37.w.1																				8.65503e-05	5.72987e-05	4.09472e-05	1.50499e-05	4.1368e-05	0.000152708	0.000215201	0.000225724	0.000292378	4.42876e-05	9.85444e-06	3.56301e-05	1.57113e-05	7.6175e-06	0.000236346	0.000198323	0.00453233	0.000480459	0.00030341	0.0047172	0.000353779	0.000145648
NonEU	127	Bottles for treatment, Recycling of bottles by direct reuse	p40.11.a																				0	0	0	0	0	0	0	0	0	0	0	0	0	0	0	0	0	0	0	0	0	0
NonEU	128	Electricity by coal	p40.11.b																				0.00645916	0.00221564	0.00208252	0.00102631	0.00172939	0.00367217	0.00899898	0.00947294	0.00978335	0.00137346	0.000573188	0.00123863	0.00038207	0.00103307	0.00625394	0.0076918	0.0264288	0.0226847	0.024672	0.0577519	0.010085	0.00895672
NonEU	129	Electricity by gas	p40.11.c																				0.000840598	0.000385819	0.000316636	0.000210502	0.000234788	0.000883907	0.00147383	0.00199657	0.00617587	0.000463127	0.000124707	0.000598848	7.94727e-05	0.000187432	0.00168701	0.00351016	0.0194432	0.00707341	0.00389392	0.0504156	0.00388167	0.00183883
NonEU	130	Electricity by nuclear	p40.11.d																				1.32306e-05	1.3133e-05	8.35163e-06	1.0997e-06	8.61784e-07	8.00112e-06	1.00953e-05	9.66222e-06	2.28652e-05	4.03381e-06	1.21046e-06	3.5859e-06	3.81719e-07	4.66597e-06	9.97882e-06	6.42645e-06	2.01064e-05	3.57761e-05	1.11019e-05	5.63817e-05	1.69974e-05	1.94526e-05
NonEU	131	Electricity by hydro	p40.11.e																				2.97679e-05	1.403e-05	1.0263e-05	2.56555e-06	2.09759e-06	1.41259e-05	2.38553e-05	2.21154e-05	6.06617e-05	8.07588e-06	1.31291e-06	6.54865e-06	8.5471e-07	1.15179e-05	1.90699e-05	3.9343e-05	0.000254672	6.94798e-05	2.80873e-05	0.000771776	5.05151e-05	4.46464e-05
NonEU	132	Electricity by wind	p40.11.f																				5.07254e-06	2.25247e-06	1.97606e-06	6.40445e-07	1.06113e-06	5.70528e-06	9.23963e-06	8.04325e-06	1.56465e-05	5.62581e-06	5.37217e-07	2.33528e-06	4.55326e-07	4.45397e-06	1.14858e-05	7.87779e-06	9.29397e-06	3.11072e-05	1.08736e-05	4.27007e-05	1.78227e-05	2.98923e-05
NonEU	133	Electricity by petroleum and other oil derivatives	p40.11.g																				0.000266605	0.00018087	0.000123805	5.74703e-05	0.000116164	0.000517747	0.000620884	0.00182503	0.00451858	0.0002165	7.42338e-05	0.000446275	4.61968e-05	6.43328e-05	0.0010355	0.00177437	0.00208335	0.0042555	0.00160561	0.026774	0.00242254	0.000935251
NonEU	134	Electricity by biomass and waste	p40.11.h																				9.22182e-06	5.73452e-05	3.36218e-05	4.18043e-06	3.77419e-06	2.66534e-05	2.43816e-05	4.39511e-05	7.10668e-05	1.74722e-05	2.53266e-06	8.50323e-06	1.15446e-06	1.14714e-05	3.4868e-05	2.83483e-05	3.55952e-05	0.00016295	8.55885e-05	0.000157443	4.9249e-05	4.63112e-05
NonEU	135	Electricity by solar photovoltaic	p40.11.i																				6.59854e-07	2.30287e-07	1.89339e-07	1.69577e-07	1.66062e-07	4.62498e-07	9.10662e-07	1.48804e-06	2.23024e-06	3.11801e-07	8.13785e-08	3.5077e-07	5.37404e-08	4.06695e-07	1.07461e-06	1.58029e-06	3.09733e-06	5.03968e-06	3.38678e-06	6.49925e-06	1.82473e-06	1.32963e-06
NonEU	136	Electricity by solar thermal	p40.11.j																				3.2458e-07	3.14524e-07	1.79829e-07	5.7995e-08	1.46492e-07	6.48172e-07	8.1253e-07	1.81926e-06	1.46247e-06	2.44499e-07	3.92614e-08	1.94398e-06	9.38923e-08	5.28779e-08	1.25102e-06	4.36124e-07	2.35643e-06	1.33177e-05	2.9971e-06	9.22853e-06	1.23115e-06	8.12363e-07
NonEU	137	Electricity by tide, wave, ocean	p40.11.k																				1.61291e-06	1.19697e-06	7.56175e-07	7.17769e-07	8.34231e-07	1.78903e-06	5.55064e-06	1.04887e-05	7.16524e-06	1.89994e-06	3.94911e-07	2.55778e-06	2.25659e-07	1.98644e-06	4.2988e-06	3.07463e-06	6.15977e-06	3.79644e-05	1.99245e-05	2.57295e-05	8.73161e-06	4.95593e-06
NonEU	138	Electricity by Geothermal	p40.11.l																				5.35046e-06	4.61215e-06	3.32259e-06	5.66359e-07	1.42484e-06	4.71597e-06	9.144e-06	9.74143e-06	1.02899e-05	2.25409e-06	4.66705e-07	1.27859e-06	3.75549e-07	1.43903e-06	6.369e-06	5.88726e-06	9.62293e-06	1.56583e-05	8.21595e-06	2.98671e-05	9.04447e-06	1.22296e-05
NonEU	139	Electricity nec	p40.12																				3.9392e-05	7.29698e-05	4.80268e-05	6.08458e-06	1.77261e-05	6.05708e-05	9.55457e-05	0.000115118	0.000271706	3.98043e-05	6.16028e-06	2.30787e-05	4.86157e-06	1.14035e-05	9.58092e-05	0.000166155	0.000680682	0.000294346	0.00013421	0.00110659	0.000109143	9.20445e-05
NonEU	140	Transmission services of electricity	p40.13																				1.27708e-05	1.48623e-05	1.00607e-05	2.24216e-06	3.87093e-06	1.32267e-05	2.13343e-05	3.31339e-05	5.96825e-05	5.68437e-06	1.65562e-06	5.61225e-06	1.10324e-06	3.95962e-06	1.98195e-05	6.84733e-05	0.000115136	6.78548e-05	6.46932e-05	0.00155545	3.77204e-05	2.66945e-05
NonEU	141	Distribution and trade services of electricity	p40.2.a																				9.98942e-06	1.79037e-05	1.13357e-05	1.82941e-06	2.78842e-06	1.51387e-05	1.74219e-05	2.4234e-05	7.20799e-05	8.89633e-06	1.92514e-06	9.10312e-06	1.05169e-06	5.56449e-06	2.2483e-05	3.65708e-05	4.70403e-05	0.000102827	3.55439e-05	0.000119482	4.47406e-05	3.36835e-05
NonEU	142	Coke oven gas	p40.2.b																				2.77974e-05	1.01818e-05	8.9647e-06	2.3171e-06	5.26655e-06	1.65719e-05	3.89963e-05	3.87361e-05	3.97802e-05	6.06271e-06	2.25245e-06	4.10037e-06	1.36632e-06	3.57689e-05	3.63172e-05	1.98228e-05	4.21323e-05	6.25783e-05	6.3139e-05	0.000110681	4.7054e-05	7.70297e-05
NonEU	143	Blast Furnace Gas	p40.2.c																				3.73578e-05	2.11435e-05	1.74371e-05	4.07946e-06	1.08889e-05	3.52817e-05	7.05872e-05	7.74899e-05	8.674e-05	1.32533e-05	3.85928e-06	8.52729e-06	2.69423e-06	3.99523e-06	4.64333e-05	3.39105e-05	7.83091e-05	9.75929e-05	6.65169e-05	0.000243936	8.27019e-05	8.23979e-05
NonEU	144	Oxygen Steel Furnace Gas	p40.2.d																				8.58099e-07	5.63596e-07	4.30897e-07	1.11135e-07	2.41062e-07	1.05291e-06	1.66787e-06	2.04997e-06	2.39277e-06	5.24561e-07	1.44732e-07	2.15503e-07	8.03669e-08	1.56776e-07	1.44687e-06	7.76718e-07	3.25193e-06	4.43375e-06	2.71319e-06	6.98308e-06	2.07078e-06	1.22596e-06
NonEU	145	Gas Works Gas	p40.2.e																				9.40424e-07	4.84804e-07	5.09861e-07	3.24509e-07	9.20592e-07	1.13906e-06	2.03958e-06	3.24371e-06	8.01862e-06	5.23557e-07	3.33069e-07	7.30159e-07	1.93214e-07	3.37936e-07	2.32394e-06	2.88952e-06	2.90456e-05	1.23659e-05	2.1573e-05	2.32856e-05	3.79649e-06	6.24161e-06
NonEU	146	Biogas	p40.2.1																				1.71539e-06	7.21772e-07	7.33847e-07	7.25835e-07	5.39176e-07	1.54764e-06	4.1723e-06	6.51643e-06	1.83335e-05	5.93464e-07	5.02569e-07	8.41258e-07	1.12416e-07	3.78146e-07	1.91188e-06	3.72965e-06	3.50301e-06	1.21242e-05	2.02349e-05	1.08475e-05	1.32868e-05	3.66952e-06
NonEU	147	Distribution services of gaseous fuels through mains	p40.3																				0.000121933	4.28271e-05	3.78582e-05	2.56903e-05	2.61806e-05	8.69871e-05	0.00019023	0.000231054	0.000205227	4.11794e-05	1.80942e-05	0.000164009	8.30355e-06	5.58399e-05	0.00017799	0.000501556	0.000260555	0.000643271	0.000759083	0.00068243	0.000396947	0.000342187
NonEU	148	Steam and hot water supply services	p41																				0.00107818	0.000757993	0.000561945	0.000137651	0.00020221	0.00102637	0.00144267	0.00169463	0.00302642	0.000383039	0.000158164	0.000399932	8.77453e-05	0.0014984	0.0021879	0.00159122	0.00141367	0.00823902	0.00435172	0.00919635	0.0055861	0.00374895
NonEU	149	Collected and purified water, distribution services of water (41)	p45																				1.23148e-06	7.16938e-07	5.81434e-07	2.97782e-07	5.45313e-07	1.45027e-06	2.92955e-06	4.12293e-06	2.7343e-06	1.31349e-06	3.1952e-07	2.01235e-06	1.86271e-07	2.61224e-07	4.04089e-06	3.14965e-06	2.32926e-06	2.51847e-05	9.209e-06	2.00176e-05	5.40087e-06	3.72427e-06
NonEU	150	Construction work (45)	p45.w																				3.13566e-05	1.57468e-05	1.12757e-05	1.39671e-05	7.07281e-06	3.05207e-05	6.92179e-05	0.000111588	0.000132239	3.15115e-05	7.415e-06	2.27452e-05	3.73774e-06	2.12757e-05	7.95097e-05	9.31452e-05	0.000136043	0.000578569	0.000447468	0.000403635	0.000281233	0.000131953
NonEU	151	Secondary construction material for treatment, Re-processing of secondary construction material into aggregates	p50.a																				0	0	0	0	0	0	0	0	0	0	0	0	0	0	0	0	0	0	0	0	0	0
NonEU	152	Sale, maintenance, repair of motor vehicles, motor vehicles parts, motorcycles, motor cycles parts and accessoiries	p50.b																				1.83957e-05	3.49798e-05	2.62081e-05	8.17212e-06	1.41338e-05	4.40932e-05	9.14624e-05	0.000215844	0.00029581	0.000260759	9.75856e-06	9.40919e-05	3.88225e-06	4.62606e-05	6.23534e-05	4.74159e-05	0.000240108	0.000266369	0.000138394	0.000944375	0.000151061	0.000124295
NonEU	153	Retail trade services of motor fuel	p51																				2.658e-05	2.38735e-05	1.6629e-05	5.992e-06	6.74937e-06	4.13569e-05	8.97431e-05	0.000190595	0.000132289	5.10585e-05	1.66164e-05	6.81398e-05	2.32176e-06	1.90213e-05	5.21574e-05	6.83481e-05	0.000219061	0.000208691	0.000273152	0.000428581	0.000126092	0.000140832
NonEU	154	Wholesale trade and commission trade services, except of motor vehicles and motorcycles (51)	p52																				7.6586e-05	0.000119546	7.61043e-05	3.0271e-05	6.06542e-05	0.000115857	0.000177474	0.00039361	0.000393151	8.74994e-05	4.38167e-05	0.00012834	8.95233e-06	8.26857e-05	0.000182293	0.000165272	0.00113625	0.000771136	0.000415525	0.00293145	0.000375916	0.000285926
NonEU	155	Retail trade services, except of motor vehicles and motorcycles; repair services of personal and household goods (52)	p55																				5.35122e-05	3.64355e-05	2.82264e-05	1.01302e-05	7.16355e-05	8.0458e-05	0.000327439	0.000783507	0.000187417	0.000205921	3.18226e-05	0.000736964	5.1077e-06	3.51224e-05	0.000112914	0.000108707	0.000587108	0.000515089	0.00030218	0.0011423	0.000222458	0.000177863
NonEU	156	Hotel and restaurant services (55)	p60.1																				6.50772e-05	9.4069e-05	7.0839e-05	1.79225e-05	3.47445e-05	0.000111498	0.000149313	0.000199509	0.000275509	0.000276218	3.97698e-05	0.00038573	1.10528e-05	6.30534e-05	0.000541622	7.10288e-05	0.000162604	0.0021248	0.000875284	0.000980832	0.000478311	0.000593117
NonEU	157	Railway transportation services	p60.2																				0.000133852	0.000476676	0.00031504	9.79619e-05	4.51872e-05	0.000652632	0.000456046	0.000894337	0.000883861	0.000121972	2.61074e-05	0.000109543	1.5492e-05	8.3502e-05	0.000307486	0.00162793	0.000888767	0.00234688	0.0010644	0.00247334	0.000940929	0.000677326
NonEU	158	Other land transportation services	p60.3																				3.40681e-05	7.13707e-05	4.61366e-05	2.205e-05	1.52722e-05	0.000122939	0.000101803	0.000188099	0.000232053	0.000165654	1.27779e-05	7.69756e-05	8.46003e-06	3.33254e-05	0.000177524	0.000213672	0.000541856	0.000728305	0.000225816	0.00114535	0.0013859	0.000607025
NonEU	159	Transportation services via pipelines	p61.1																				0.00263185	0.00348034	0.00198258	0.000373715	0.0010533	0.00591709	0.00668997	0.00430039	0.10845	0.003766	0.00232883	0.00351138	8.26518e-05	0.000776251	0.0305297	0.032558	0.00294781	0.0289536	0.0165989	0.00543764	0.00235533	0.00307038
NonEU	160	Sea and coastal water transportation services	p61.2																				0.000835755	0.000339205	0.00030589	0.000182167	0.000351832	0.00058594	0.00180813	0.00237733	0.00572103	0.0180929	0.000714438	0.00353556	6.55665e-05	0.000383329	0.00161396	0.00100024	0.000830445	0.0102027	0.0050746	0.00726784	0.00640854	0.0065338
NonEU	161	Inland water transportation services	p62																				9.37624e-05	9.55003e-05	6.18368e-05	2.99944e-05	9.02314e-05	0.000414259	0.000360097	0.000525396	0.00215486	0.00058739	0.000139995	0.000473067	0.000362059	0.000139105	0.0323329	0.00025793	0.000384418	0.0101149	0.0024757	0.00101637	0.00132581	0.0229242
NonEU	162	Air transport services (62)	p63																				0.000454096	0.000404024	0.000304987	0.00042838	0.000194204	0.000981229	0.00104953	0.00214309	0.00224836	0.00174718	9.51082e-05	0.000836476	0.000100263	0.000213354	0.00080916	0.00054055	0.00355925	0.00613954	0.0023294	0.00479897	0.00925608	0.0103456
NonEU	163	Supporting and auxiliary transport services; travel agency services (63)	p64																				0.00015205	0.000184164	0.000103233	6.97109e-05	5.97606e-05	0.000348751	0.000431265	0.000908295	0.000738485	0.000297671	6.64608e-05	0.00043142	3.87521e-05	6.2303e-05	0.000687391	0.000351948	0.000537066	0.00351193	0.00105404	0.00355426	0.00241322	0.00194232
NonEU	164	Post and telecommunication services (64)	p65																				1.09256e-05	1.19615e-05	8.46393e-06	7.53795e-06	4.25764e-06	1.57047e-05	2.84894e-05	5.86521e-05	6.26909e-05	1.31472e-05	3.07957e-06	1.69565e-05	1.87575e-06	3.54676e-06	2.4322e-05	2.25619e-05	3.69375e-05	0.000194574	0.000106383	0.000147737	0.000134579	6.50893e-05
NonEU	165	Financial intermediation services, except insurance and pension funding services (65)	p66																				2.65264e-05	2.55605e-05	1.98095e-05	9.60047e-06	1.04543e-05	8.24696e-05	6.45706e-05	0.000115373	0.000138909	0.000119788	5.68374e-06	3.4178e-05	1.21225e-05	9.21346e-06	6.2509e-05	4.7153e-05	7.22323e-05	0.000372207	0.000233211	0.000328514	0.000132212	0.000102892
NonEU	166	Insurance and pension funding services, except compulsory social security services (66)	p67																				6.69494e-06	1.11943e-05	7.22639e-06	5.03784e-06	3.24183e-06	2.32011e-05	2.33324e-05	4.23785e-05	5.42301e-05	1.32295e-05	4.27214e-06	8.23743e-06	1.85551e-06	4.41908e-06	2.11026e-05	1.57553e-05	3.73797e-05	0.000112469	6.32066e-05	8.90717e-05	0.000101732	0.000146062
NonEU	167	Services auxiliary to financial intermediation (67)	p70																				9.72846e-06	1.26532e-05	8.74191e-06	7.11012e-06	4.24045e-06	4.1443e-05	2.36127e-05	4.59192e-05	7.98775e-05	2.24094e-05	3.11402e-06	5.68319e-05	3.19284e-06	6.4107e-06	2.6029e-05	1.88084e-05	5.18294e-05	0.000335256	0.000578846	0.000182948	8.0916e-05	6.23199e-05
NonEU	168	Real estate services (70)	p71																				1.63814e-05	4.27181e-05	2.6647e-05	6.51268e-06	6.92775e-06	7.00722e-05	0.000147585	0.000347293	8.73299e-05	4.38541e-05	4.15847e-06	3.69535e-05	4.49263e-06	8.96912e-06	3.76914e-05	2.92751e-05	2.88671e-05	0.000208447	8.92362e-05	0.000148467	0.000108964	7.67907e-05
NonEU	169	Renting services of machinery and equipment without operator and of personal and household goods (71)	p72																				6.96873e-05	3.99101e-05	3.78018e-05	1.43825e-05	2.75334e-05	0.000105018	0.000128497	0.000230602	0.00220971	0.00336091	3.70303e-05	9.14449e-05	1.08356e-05	1.86523e-05	0.000306714	0.000115802	0.000184032	0.000617192	0.000347022	0.000513431	0.000368871	0.000371326
NonEU	170	Computer and related services (72)	p73																				1.23687e-05	1.47189e-05	1.19131e-05	7.18436e-06	5.22616e-06	3.8578e-05	3.12028e-05	5.97336e-05	6.21962e-05	1.60808e-05	1.9599e-06	1.63476e-05	8.61387e-06	4.29505e-06	1.9759e-05	1.6718e-05	2.3054e-05	0.000175672	9.21344e-05	0.000122846	0.00013625	6.93558e-05
NonEU	171	Research and development services (73)	p74																				8.58799e-05	1.80073e-05	1.464e-05	6.14531e-06	1.05865e-05	4.51018e-05	6.58139e-05	0.000162704	8.4197e-05	3.90359e-05	4.05524e-06	0.000117747	4.42893e-06	2.94224e-05	8.90811e-05	3.47307e-05	2.53292e-05	0.00646805	0.000575593	0.00472373	9.73858e-05	0.000169962
NonEU	172	Other business services (74)	p75																				0.000134105	0.000107226	8.86854e-05	0.000117771	4.21048e-05	0.000433529	0.000412623	0.000812979	0.000554785	0.000615887	4.09736e-05	0.000269326	9.47244e-05	4.02436e-05	0.000234193	0.00022879	0.000672793	0.00198214	0.00142749	0.00120274	0.00197219	0.000873517
NonEU	173	Public administration and defence services; compulsory social security services (75)	p80																				8.07322e-07	1.49032e-06	1.1173e-06	1.03037e-06	1.29833e-06	1.1802e-06	4.15813e-06	8.9784e-06	5.80964e-06	5.23156e-06	1.45456e-06	8.72531e-06	3.88061e-07	7.10525e-07	2.06207e-06	1.56477e-06	1.63034e-06	3.47598e-05	3.34292e-05	1.37781e-05	2.66543e-05	8.49387e-06
NonEU	174	Education services (80)	p85																				2.44334e-07	1.39557e-07	1.40343e-07	7.98866e-08	2.36001e-07	4.00236e-07	1.61023e-06	2.76976e-06	1.46219e-06	4.901e-07	5.4134e-07	9.98066e-07	1.58246e-07	6.00652e-08	6.75985e-07	7.41186e-07	4.75915e-07	3.66406e-06	2.89888e-06	6.64619e-06	1.92293e-06	1.59355e-06
NonEU	175	Health and social work services (85)	p90.1.a																				1.2429e-06	8.30828e-07	6.88608e-07	1.32945e-07	5.95981e-07	1.35134e-06	3.00276e-06	3.29782e-06	2.41847e-06	6.50127e-07	1.93939e-06	8.85752e-07	9.72798e-08	3.89215e-07	1.54567e-06	1.26874e-06	1.69742e-06	1.08067e-05	7.45126e-06	8.09325e-06	2.39397e-06	1.88573e-06
NonEU	176	Food waste for treatment: incineration	p90.1.b																				1.83048e-06	5.36789e-06	4.34561e-06	3.71566e-07	1.42518e-06	3.86496e-06	7.10808e-06	6.03624e-05	6.07662e-06	4.42917e-06	5.9567e-07	4.10437e-05	2.40407e-07	6.31776e-06	0.000131464	5.79557e-06	6.51669e-06	0.00102938	0.000265584	0.000109602	1.39376e-05	1.17352e-05
NonEU	177	Paper waste for treatment: incineration	p90.1.c																				1.00084e-06	2.66135e-06	2.09148e-06	2.05036e-07	4.93825e-07	2.95358e-06	3.15103e-06	3.40687e-05	4.29338e-06	2.54743e-06	2.66248e-07	3.78173e-05	1.94147e-07	1.29853e-06	4.64776e-05	1.39327e-05	5.59688e-06	0.000276081	6.04335e-05	7.31357e-05	6.38137e-06	7.15337e-06
NonEU	178	Plastic waste for treatment: incineration	p90.1.d																				4.70967e-06	3.55807e-05	2.22672e-05	1.69089e-06	2.52931e-06	2.52384e-05	2.09749e-05	0.000113108	8.37291e-05	2.06097e-05	1.76016e-06	8.78735e-05	1.22179e-06	1.79383e-05	0.000140243	6.86265e-05	1.52387e-05	0.000891565	0.000146609	0.000281183	5.05965e-05	4.50375e-05
NonEU	179	Intert/metal waste for treatment: incineration	p90.1.e																				8.03051e-06	3.29321e-05	2.34055e-05	2.89946e-06	4.81496e-06	4.76636e-05	2.65003e-05	0.000197748	7.59414e-05	2.37759e-05	2.83562e-06	0.000261455	9.36645e-06	2.57512e-05	0.00026776	1.92084e-05	1.57184e-05	0.00332838	0.000739977	0.000637496	0.00014655	0.000184877
NonEU	180	Textiles waste for treatment: incineration	p90.1.f																				3.99995e-06	3.28428e-05	2.03314e-05	1.28785e-06	2.20563e-06	2.6208e-05	2.95409e-05	0.000189764	8.74357e-05	1.76175e-05	1.55432e-06	0.000164127	1.59982e-06	1.10787e-05	0.00020473	1.33701e-05	8.93696e-06	0.000474843	0.0001379	7.97301e-05	3.97381e-05	3.78054e-05
NonEU	181	Wood waste for treatment: incineration	p90.1.g																				4.77399e-07	1.14563e-06	9.11575e-07	9.97383e-08	2.76233e-07	9.0192e-07	1.76177e-06	1.44769e-05	2.78288e-06	1.15749e-06	1.23155e-07	2.54689e-05	8.91577e-08	9.74446e-07	2.34922e-05	1.35438e-06	2.46145e-06	0.000197202	4.28944e-05	4.11058e-05	3.97739e-06	4.1497e-06
NonEU	182	Oil/hazardous waste for treatment: incineration	p90.2.a																				2.74293e-06	1.23211e-05	8.32956e-06	1.04155e-06	1.49464e-06	1.31917e-05	8.17229e-06	7.51299e-05	3.91961e-05	1.21322e-05	8.53173e-07	0.000136	9.48814e-06	7.72619e-06	6.31503e-05	7.10669e-06	7.58448e-06	0.000711562	8.88626e-05	0.000247777	4.73103e-05	5.82702e-05
NonEU	183	Food waste for treatment: biogasification and land application	p90.2.b																				2.92865e-07	2.91956e-07	2.50738e-07	7.5304e-08	1.3901e-07	6.06946e-07	1.54229e-06	3.45989e-06	1.66346e-06	5.35706e-07	1.09676e-07	4.39667e-06	4.14477e-08	2.01056e-07	1.87909e-06	1.51911e-06	8.49853e-07	1.3729e-05	3.79681e-06	4.28836e-06	1.44118e-06	1.10903e-06
NonEU	184	Paper waste for treatment: biogasification and land application	p90.2.c																				1.07463e-07	1.27217e-07	9.63381e-08	3.18089e-08	4.33283e-08	2.30078e-07	6.87412e-07	1.50286e-06	5.85243e-07	1.83871e-07	2.60829e-08	1.55677e-06	1.89663e-08	1.45713e-07	5.91776e-07	5.91187e-07	6.23819e-07	2.21991e-06	2.06458e-06	2.16508e-06	5.78791e-07	5.40491e-07
NonEU	185	Sewage sludge for treatment: biogasification and land application	p90.3.a																				5.24198e-06	6.7603e-06	5.51999e-06	5.12477e-06	2.85023e-06	4.88271e-06	1.83882e-05	0.000282441	1.34959e-05	7.38606e-06	1.164e-06	6.83365e-05	5.19526e-07	1.08904e-05	0.000141449	2.75064e-05	1.10724e-05	0.00271896	0.000364076	0.000833269	0.000101825	7.91586e-05
NonEU	186	Food waste for treatment: composting and land application	p90.3.b																				5.33278e-06	1.24748e-05	1.06242e-05	2.40074e-06	2.61945e-06	2.00489e-05	1.78072e-05	0.000149905	2.75102e-05	0.000110038	1.81473e-06	8.11662e-05	4.64044e-06	1.00523e-05	0.000190881	8.30687e-05	4.78523e-05	0.00115926	0.000174399	0.000355706	7.52027e-05	7.46442e-05
NonEU	187	Paper and wood waste for treatment: composting and land application	p90.4.a																				2.67195e-07	1.96353e-07	1.64153e-07	1.00583e-07	9.05009e-08	3.34974e-07	1.03018e-06	2.08085e-06	1.43854e-06	2.00542e-07	5.17669e-08	8.96013e-07	3.85221e-08	8.17951e-08	1.14178e-06	1.0134e-06	9.33155e-07	3.14886e-05	1.29378e-05	4.67369e-06	1.60881e-06	1.21942e-06
NonEU	188	Food waste for treatment: waste water treatment	p90.4.b																				1.99251e-05	3.01278e-05	2.22539e-05	1.3664e-05	1.00224e-05	3.55196e-05	6.08643e-05	0.000493684	8.37744e-05	2.57136e-05	5.5933e-06	9.49988e-05	2.81213e-06	1.81604e-05	0.000371841	0.000120761	0.000157013	0.00436988	0.000726712	0.00148089	0.000305503	0.000184168
NonEU	189	Other waste for treatment: waste water treatment	p90.5.a																				2.10978e-05	4.57695e-05	3.2633e-05	6.83649e-06	9.33096e-06	6.67631e-05	5.75151e-05	0.000474985	0.00011102	3.95464e-05	4.90975e-06	0.000256643	4.194e-06	2.10713e-05	0.000302518	5.61242e-05	7.40804e-05	0.00431364	0.000594418	0.00152081	0.000188543	0.000159669
NonEU	190	Food waste for treatment: landfill	p90.5.b																				5.85563e-05	0.000167844	0.000104495	4.33316e-05	2.13217e-05	0.00019436	0.000175314	0.00161863	0.000500354	0.000145919	1.08881e-05	0.000183285	2.03762e-05	9.82563e-05	0.000804002	0.000223831	0.000223792	0.0128311	0.00116823	0.00500053	0.00105801	0.00080039
NonEU	191	Paper for treatment: landfill	p90.5.c																				1.52071e-05	3.78679e-05	2.53978e-05	1.40948e-05	6.18505e-06	3.56042e-05	5.7385e-05	0.000633798	0.000103008	3.7195e-05	2.89654e-06	9.3727e-05	1.01604e-05	1.98676e-05	0.000368763	6.01684e-05	6.96322e-05	0.00530282	0.000557283	0.00191994	0.000364965	0.000284362
NonEU	192	Plastic waste for treatment: landfill	p90.5.d																				3.78473e-06	1.5508e-05	9.56155e-06	1.64005e-06	1.32168e-06	1.20994e-05	9.27265e-06	9.3924e-05	4.50078e-05	7.68134e-06	8.41654e-07	9.56784e-06	1.34905e-06	8.30121e-06	7.1354e-05	1.36565e-05	1.73759e-05	0.000761848	7.97913e-05	0.000295417	3.41868e-05	3.97477e-05
NonEU	193	Inert/metal/hazardous waste for treatment: landfill	p90.5.e																				3.95337e-06	9.21895e-06	6.57316e-06	1.17917e-06	1.4106e-06	8.05844e-06	9.65676e-06	0.00022882	2.23492e-05	6.428e-06	7.66415e-07	6.92364e-05	2.32506e-06	6.17902e-06	0.000101853	7.24393e-06	1.11725e-05	0.00205813	0.000181383	0.000754604	3.6513e-05	6.46668e-05
NonEU	194	Textiles waste for treatment: landfill	p90.5.f																				2.99481e-06	5.32946e-06	3.44923e-06	2.24042e-06	8.91588e-07	6.58174e-06	9.31168e-06	8.70322e-05	1.92468e-05	3.64411e-06	4.49389e-07	7.31228e-06	3.04473e-06	3.84633e-06	8.3809e-05	9.93091e-06	1.75778e-05	0.000533391	4.24413e-05	0.00021294	5.41757e-05	4.12385e-05
NonEU	195	Wood waste for treatment: landfill	p91																				5.42451e-06	1.90637e-05	1.18072e-05	4.9189e-06	1.93692e-06	1.61397e-05	1.75532e-05	0.000172188	5.9621e-05	1.12809e-05	1.17895e-06	1.27275e-05	3.11668e-06	1.06479e-05	0.000140869	2.31312e-05	2.69271e-05	0.00125664	0.000135823	0.000509107	0.000106444	7.89808e-05
NonEU	196	Membership organisation services n.e.c. (91)	p92																				5.84512e-07	2.77745e-07	2.5152e-07	4.16351e-07	2.09375e-07	5.73118e-07	1.7891e-06	3.3404e-06	1.82548e-06	3.8301e-07	1.2119e-07	4.26149e-07	7.52677e-08	9.18158e-08	1.01802e-06	1.35593e-06	1.36276e-06	9.26996e-06	6.63552e-06	6.14677e-06	4.59903e-06	2.33494e-06
NonEU	197	Recreational, cultural and sporting services (92)	p93																				4.44238e-06	5.03302e-06	3.55019e-06	2.75664e-06	2.02758e-06	1.50395e-05	1.47851e-05	3.3906e-05	6.68219e-05	5.88493e-06	1.73897e-06	1.14439e-05	1.78384e-06	2.02559e-06	1.17263e-05	1.16091e-05	2.33009e-05	8.25344e-05	4.7901e-05	6.31315e-05	5.20876e-05	3.20693e-05
NonEU	198	Other services (93)	p95																				9.08535e-06	2.69212e-06	2.31355e-06	1.18177e-06	1.40623e-06	5.02421e-06	9.22684e-06	2.12713e-05	1.25306e-05	4.22617e-06	1.20521e-06	4.8831e-06	5.81933e-07	3.15682e-06	8.23306e-06	6.35393e-06	1.4579e-05	7.74972e-05	4.77624e-05	5.53169e-05	2.54068e-05	1.61179e-05
NonEU	199	Private households with employed persons (95)	p99																				5.70404e-07	2.70888e-07	2.06387e-07	1.11305e-07	2.43618e-07	4.24245e-07	1.85467e-06	2.67207e-06	1.05546e-06	3.14222e-07	6.50494e-08	1.49032e-07	3.28203e-08	3.31609e-08	4.06676e-06	7.47608e-07	8.10771e-07	3.28608e-06	6.39776e-06	6.55495e-06	1.34585e-06	7.29254e-07
NonEU	200	Extra-territorial organizations and bodies	p01.a																				0	0	0	0	0	0	0	0	0	0	0	0	0	0	0	0	0	0	0	0	0	0
[truncated: 354 more columns]
